# Supplementary material for: Tracing Arab-Islamic Inheritance in Madagascar: Study of the Y-chromosome and Mitochondrial DNA in the Antemoro
Source: PubMed Central journal article supplement (PMC3838347; doi:10.1371/journal.pone.0080932), 2013-11-22
Supplement: pone.0080932.s001.pdf [file pone.0080932.s001.pdf]

**Supporting information - Tracing Arab-Islamic inheritance in Madagascar: study of the Y-chromosome and mitochondrial DNA in the Antemoro.**

Mélanie Capredon<sup>1,2,3</sup>, Nicolas Brucato<sup>4</sup>, Laure Tonasso<sup>1</sup>, Valérie Choesmel-Cadamuro<sup>1</sup>, François-Xavier Ricaut<sup>1</sup>, Harilanto Razafindrazaka<sup>1</sup>, Andriamihaja Bakomalala Rakotondrabe<sup>5</sup>, Mamisoa Adelta Ratolojanahary<sup>5</sup>, Louis-Paul Randriamarolaza<sup>5</sup>, Bernard Champion<sup>2</sup>, Jean-Michel Dugoujon<sup>1</sup>

<sup>1</sup>Laboratoire d'Anthropologie Moléculaire et Imagerie de Synthèse, CNRS and Université Paul Sabatier Toulouse III, UMR5288, Toulouse, France; <sup>2</sup>Centre de recherche littéraire et historique de l'Océan Indien (CRLHOI), Département d'ethnologie, Université de La Réunion, Saint-Denis, France ; <sup>3</sup> Department of Pediatrics, CHU Sainte Justine, Faculty of Medecine, University of Montreal, Quebec, Canada ; <sup>4</sup> Language and Genetics Department, Max Planck Institute for Psycholinguistics, Nijmegen, The Netherlands. ; <sup>5</sup> Laboratoire d'Anthropologie Patrimoine -Transformations sociales- Transculturalité (LAP2T), Université Antananarivo, Antananarivo, Madagascar.

***Table S1. Y-STR profiles in the Antemoro..... 3***

***Table S2. Database used for the analysis of Y haplogroup frequencies ..... 8***

***Table S3. Database used for the analysis of the seven Y-STR markers ..... 11***

***Table S4. JI haplotype references used for the median-joining network ..... 13***

***Table S5. T1 haplotype references used for the median-joining network ..... 14***

***Table S6. HVI and HVII profiles in the Antemoro ..... 16***

***Table S7. Database used for HVI analysis ..... 21***

***Table S8. Table of population pairwise  $F_{ST}$  values based on Y haplogroup frequencies. ... 24***

***Table S9. Shared haplotypes between the Ampanabaka, other Malagasy populations and the Comoros, using 17 Y-STR markers..... 28***

***Table S10. Shared haplotypes between the Anteony, other Malagasy populations and the Comoros, using 17 Y-STR markers ..... 29***

***Table S11. Shared haplotypes between the Antalaotra, other Malagasy populations and the Comoros, using 17 Y-STR markers. .... 30***

***Figure S1. MDS plot of  $F_{ST}$  between Malagasy populations and the Comoros using NRY haplogroup frequencies (Kruskal stress: 0.172). ..... 32***

***Table S12. Shared haplotypes between the Ampanabaka and the database using seven Y-STR markers ..... 33***

***Table S13. Shared haplotypes between the Antalaotra and the database, using seven Y-STR markers ..... 36***

***Table S14. Shared haplotypes between the Anteony and the database using seven Y-STR markers ..... 39***

|                                                                                                                                                                                                                                                                                       |           |
|---------------------------------------------------------------------------------------------------------------------------------------------------------------------------------------------------------------------------------------------------------------------------------------|-----------|
| <i>Figure S2. MDS plot of <math>F_{ST}</math> computed from Y haplogroup frequencies between the Antemoro and populations from various geographic regions (Kruskal stress =0.227). Anty: Anteony, Anta: Antalaotra, Ampa: Ampanabaka.....</i>                                         | <b>43</b> |
| <i>Table S15. Population pairwise <math>F_{ST}</math> values based on HVI in our three Antemoro groups .</i>                                                                                                                                                                          | <b>44</b> |
| <i>Figure S3. MDS plot computed from <math>F_{ST}</math> values between Malagasy populations, based on HVI data. Lower diagonal: <math>F_{ST}</math>; upper diagonal: p-values. (+) p-value significant at 1% ; (-) p-values non- significant at 1%. Kruskal stress = 0.329. ....</i> | <b>47</b> |
| <i>Figure S4. PCA computed from mitochondrial haplogroups frequency in Malagasy and Comoros populations. The insert showed the contribution of haplogroups to the two components. ....</i>                                                                                            | <b>48</b> |
| <i>Table S16. Shared HVI haplotypes between the Ampanabaka and the other Malagasy populations.....</i>                                                                                                                                                                                | <b>49</b> |
| <i>Table S17. Shared HVI haplotypes between the Antalaotra and other Malagasy populations .....</i>                                                                                                                                                                                   | <b>49</b> |
| <i>Table S18. Shared HVI haplotypes between the Anteony and other Malagasy populations. ....</i>                                                                                                                                                                                      | <b>50</b> |
| <i>Table S19. Shared HVI unique haplotypes between the Ampanabaka and populations from the database.....</i>                                                                                                                                                                          | <b>51</b> |
| <i>Table S20. Shared HVI unique haplotypes between the Antalaotra and populations from the database.....</i>                                                                                                                                                                          | <b>55</b> |
| <i>Table S21. Shared HVI unique haplotypes between the Anteony and populations from the database .....</i>                                                                                                                                                                            | <b>59</b> |
| <i>Figure S5. MDS plots of <math>F_{ST}</math> computed from HVI haplotypes between the Antemoro and populations from various geographic regions. (a) African populations, (b) Southeast Asian and Oceanian populations; (c) European and west Eurasian populations.....</i>          | <b>64</b> |
| <i>References .....</i>                                                                                                                                                                                                                                                               | <b>65</b> |

**Table S1.** Y-STR profiles in the Antemoro

| <b>Groupe</b>    | <b>ID (Hg)</b>       | <b>DYS393</b> | <b>DYS390</b> | <b>DYS 19</b> | <b>DYS 391</b> | <b>DYS385ab</b> | <b>DYS 439</b> | <b>DYS 389I</b> | <b>DYS 392</b> | <b>DYS 389II</b> | <b>DYS 458</b> | <b>DYS 437</b> | <b>DYS 448</b> | <b>YGATAH4</b> | <b>DYS 456</b> | <b>DYS 438</b> | <b>DYS 635</b> |
|------------------|----------------------|---------------|---------------|---------------|----------------|-----------------|----------------|-----------------|----------------|------------------|----------------|----------------|----------------|----------------|----------------|----------------|----------------|
| <b>Ampnabaka</b> | <b>MA301 (E1b1a)</b> | 13            | 21            | 15            | 10             | 17,18           | 11             | 13              | 11             | 31               | 15             | 14             | 21             | 12             | 15             | 11             | 21             |
|                  | <b>MA302 (E1b1a)</b> | 13            | 21            | 15            | 10             | 16,18           | 11             | 13              | 11             | 31               | 15             | 14             | 21             | 12             | 15             | 11             | 21             |
|                  | <b>MA303 (E1b1a)</b> | 13            | 21            | 15            | 10             | 16,18           | 11             | 13              | 11             | 31               | 15             | 14             | 21             | 12             | 15             | 11             | 21             |
|                  | <b>MA304 (E1b1a)</b> | 14            | 21            | 17            | 10             | 17,19           | 12             | 13              | 11             | 30               | 17             | 13             | 21             | 11             | 15             | 11             | 21             |
|                  | <b>MA306 (E1b1a)</b> | 13            | 21            | 15            | 10             | 17,18           | 12             | 13              | 11             | 31               | 15             | 14             | 21             | 13             | 15             | 11             | 21             |
|                  | <b>MA307 (O1a2)</b>  | 13            | 23            | 15            | 10             | 13,14           | 11             | 12              | 14             | 28               | 17             | 14             | 16             | 11             | 15             | 10             | 22             |
|                  | <b>MA309 (E1b1a)</b> | 13            | 21            | 15            | 10             | 17,18           | 11             | 13              | 11             | 31               | 15             | 14             | 21             | 12             | 15             | 11             | 21             |
|                  | <b>MA310 (E1b1a)</b> | 13            | 21            | 15            | 10             | 16,18           | 11             | 13              | 11             | 31               | 15             | 14             | 21             | 12             | 15             | 11             | 21             |
|                  | <b>MA311 (E1b1a)</b> | 13            | 21            | 15            | 11             | 16,18           | 11             | 13              | 11             | 30               | 16             | 14             | 21             | 12             | 16             | 11             | 21             |
|                  | <b>MA312 (E1b1a)</b> | 13            | 21            | 15            | 10             | 16,18           | 11             | 13              | 11             | 31               | 15             | 14             | 21             | 12             | 15             | 11             | 21             |
|                  | <b>MA313 (E1b1a)</b> | 13            | 21            | 15            | 10             | 17,17           | 13             | 13              | 11             | 31               | 16             | 14             | 21             | 13             | 15             | 11             | 22             |
|                  | <b>MA314 (E1b1a)</b> | 13            | 21            | 15            | 10             | 17,18           | 11             | 13              | 11             | 31               | 15             | 14             | 21             | 12             | 15             | 11             | 21             |
|                  | <b>MA315 (E1b1a)</b> | 13            | 21            | 15            | 10             | 17,18           | 11             | 13              | 11             | 31               | 15             | 14             | 21             | 12             | 15             | 11             | 21             |
|                  | <b>MA316 (E1b1a)</b> | 13            | 21            | 15            | 10             | 16,2            | 12             | 13              | 11             | 31               | 18             | 14             | 21             | 13             | 15             | 11             | 22             |
|                  | <b>MA319 (E1b1a)</b> | 13            | 22            | 15            | 10             | 16,17           | 12             | 14              | 12             | 33               | 17             | 14             | 21             | 10             | 15             | 11             | 21             |
|                  | <b>MA321 (E1b1a)</b> | 13            | 21            | 15            | 10             | 14,18           | 12             | 14              | 11             | 32               | 15             | 14             | 20             | 11             | 15             | 11             | 21             |
|                  | <b>MA322 (E1b1a)</b> | 13            | 21            | 15            | 11             | 16,17           | 11             | 13              | 11             | 31               | 16             | 14             | 21             | 12             | 15             | 11             | 21             |
|                  | <b>MA323 (O1a2)</b>  | 14            | 23            | 15            | 10             | 13,14           | 11             | 12              | 14             | 28               | 18             | 14             | 16             | 12             | 16             | 10             | 21             |
|                  | <b>MA325 (E1b1a)</b> | 14            | 21            | 17            | 11             | 15,19           | 12             | 13              | 11             | 31               | 17             | 13             | 21             | 11             | 15             | 11             | 21             |
|                  | <b>MA326 (E1b1a)</b> | 14            | 21            | 15            | 11             | 15,2            | 13             | 13              | 11             | 30               | 16             | 14             | 21             | 11             | 15             | 11             | 23             |
|                  | <b>MA327 (E1b1a)</b> | 13            | 21            | 15            | 10             | 16,18           | 11             | 13              | 11             | 30               | 15             | 14             | 21             | 12             | 15             | 11             | 21             |
|                  | <b>MA328 (O1a2)</b>  | 13            | 23            | 16            | 10             | 14,15           | 11             | 12              | 14             | 29               | 19             | 14             | 16             | 12             | 15             | 10             | 22             |
|                  | <b>MA329 (E1b1a)</b> | 13            | 21            | 15            | 10             | 16,18           | 11             | 13              | 11             | 31               | 15             | 14             | 21             | 12             | 15             | 11             | 21             |
|                  | <b>MA330 (O1a2)</b>  | 13            | 23            | 16            | 10             | 13,14           | 11             | 12              | 14             | 28               | 18             | 14             | 16             | 12             | 15             | 10             | 21             |
|                  | <b>MA332 (E1b1a)</b> | 13            | 21            | 15            | 11             | 16,17           | 11             | 13              | 11             | 31               | 16             | 14             | 21             | 12             | 15             | 11             | 22             |

|         |                      |    |    |    |    |       |    |    |           |    |     |    |    |    |    |    |    |
|---------|----------------------|----|----|----|----|-------|----|----|-----------|----|-----|----|----|----|----|----|----|
|         | MA333 (E1b1a)        | 13 | 21 | 15 | 10 | 17,18 | 11 | 13 | 11        | 31 | 15  | 14 | 22 | 12 | 15 | 11 | 21 |
|         | MA334 (E1b1a)        | 14 | 21 | 15 | 10 | 16,18 | 12 | 13 | 11        | 31 | 17  | 14 | 21 | 12 | 16 | 11 | 21 |
|         | MA335 (E1b1a)        | 13 | 21 | 15 | 10 | 17,18 | 11 | 13 | 11        | 31 | 15  | 14 | 21 | 12 | 15 | 11 | 21 |
|         | MA337 (O1a2)         | 13 | 23 | 16 | 10 | 14,15 | 11 | 13 | 13        | 29 | 21  | 14 | 16 | 11 | 15 | 10 | 22 |
|         | MA338 (E1b1a)        | 13 | 21 | 15 | 10 | 17,18 | 11 | 13 | 11        | 31 | 15  | 14 | 21 | 12 | 15 | 11 | 22 |
|         | MA339 (O1a2)         | 13 | 23 | 15 | 10 | 13,14 | 11 | 12 | 14        | 28 | 17  | 14 | 16 | 11 | 15 | 10 | 22 |
|         | MA342 (B2a)          | 13 | 24 | 15 | 10 | 11,11 | 11 | 14 | 11        | 33 | 17  | 14 | 22 | 12 | 13 | 10 | 17 |
|         | MA343 (E1b1a)        | 14 | 21 | 15 | 11 | 15,2  | 13 | 13 | 11        | 30 | 16  | 14 | 21 | 12 | 15 | 11 | 23 |
|         | MA344 (E1b1a)        | 14 | 21 | 16 | 10 | 17,19 | 12 | 13 | 11        | 30 | 16  | 13 | 19 | 11 | 15 | 11 | 21 |
|         | MA345 (O1a2)         | 13 | 22 | 15 | 10 | 13,15 | 12 | 12 | 14        | 28 | 18  | 14 | 16 | 11 | 15 | 10 | 22 |
|         | MA346 (E1b1a)        | 15 | 21 | 15 | 11 | 16,16 | 13 | 13 | 11        | 30 | 17  | 14 | 21 | 11 | 15 | 11 | 22 |
|         | MA347 (E1b1a)        | 13 | 21 | 15 | 10 | 17,17 | 11 | 13 | <b>11</b> | 31 | 15  | 14 | 21 | 12 | 15 | 11 | 21 |
|         | MA348 (E1b1a)        | 13 | 21 | 15 | 10 | 17,18 | 11 | 13 | 11        | 31 | 15  | 14 | 21 | 12 | 14 | 12 | 21 |
|         | MA350 (E1b1a)        | 13 | 21 | 15 | 10 | 18,18 | 11 | 13 | 11        | 30 | 15  | 14 | 21 | 12 | 15 | 11 | 21 |
|         | MA351 (E2b)          | 13 | 24 | 14 | 11 | 14,18 | 11 | 12 | 11        | 28 | 17  | 14 | 19 | 11 | 15 | 11 | 25 |
|         | MA352 (J2b)          | 13 | 24 | 15 | 11 | 13,17 | 12 | 12 | 11        | 29 | 16  | 15 | 18 | 11 | 13 | 9  | 21 |
|         | MA354 (E1b1a)        | 14 | 21 | 14 | 11 | 16,16 | 12 | 13 | 11        | 30 | 18  | 14 | 21 | 11 | 16 | 11 | 21 |
|         | MA355 (E1b1a)        | 13 | 21 | 15 | 10 | 17,18 | 11 | 13 | 11        | 31 | 15  | 14 | 21 | 12 | 15 | 11 | 21 |
|         | MA356 (E1b1a)        | 13 | 21 | 15 | 10 | 16,16 | 12 | 14 | 11        | 32 | 16  | 14 | 21 | 12 | 15 | 11 | 22 |
|         | MA357 (B(xB2a))      | 13 | 23 | 15 | 11 | 12,12 | 11 | 11 | 11        | 26 | 15  | 14 | 19 | 12 | 15 | 10 | 19 |
|         | MA358 (E1b1b1)       | 13 | 24 | 13 | 10 | 16,18 | 12 | 14 | 11        | 31 | 16  | 14 | 20 | 12 | 17 | 10 | 21 |
| Anteony | MA359 (J1(xJ1a,J1b)) | 12 | 23 | 15 | 10 | 13,18 | 11 | 13 | 11        | 29 | 18* | 14 | 20 | 11 | 15 | 10 | 20 |
|         | MA360 (T1)           | 13 | 23 | 15 | 10 | 14,16 | 11 | 13 | 13        | 30 | 16  | 14 | 19 | 12 | 15 | 9  | 22 |
|         | MA361 (J1(xJ1a,J1b)) | 12 | 23 | 15 | 10 | 13,18 | 13 | 13 | 11        | 29 | 18* | 14 | 20 | 11 | 15 | 10 | 20 |
|         | MA362 (J1(xJ1a,J1b)) | 12 | 23 | 15 | 10 | 13,18 | 11 | 13 | 11        | 29 | 18* | 14 | 20 | 11 | 15 | 10 | 20 |
|         | MA363 (J1(xJ1a,J1b)) | 12 | 23 | 15 | 10 | 13,18 | 11 | 13 | 11        | 29 | 18* | 14 | 20 | 11 | 15 | 10 | 20 |
|         | MA364 (J1(xJ1a,J1b)) | 12 | 23 | 15 | 10 | 13,18 | 11 | 13 | 11        | 29 | 18* | 14 | 20 | 11 | 15 | 10 | 20 |

|                             |    |    |    |    |       |    |    |    |    |     |    |    |    |    |    |    |
|-----------------------------|----|----|----|----|-------|----|----|----|----|-----|----|----|----|----|----|----|
| <b>MA365 (T1)</b>           | 13 | 23 | 15 | 10 | 14,16 | 11 | 13 | 13 | 30 | 16  | 14 | 19 | 12 | 15 | 9  | 22 |
| <b>MA366 (T1)</b>           | 13 | 23 | 15 | 10 | 14,16 | 11 | 13 | 13 | 30 | 16  | 14 | 19 | 12 | 15 | 9  | 22 |
| <b>MA369 (J1(xJ1a,J1b))</b> | 12 | 23 | 15 | 10 | 13,18 | 11 | 13 | 11 | 29 | 18* | 14 | 20 | 11 | 15 | 10 | 20 |
| <b>MA370 (J1(xJ1a,J1b))</b> | 12 | 23 | 15 | 10 | 13,18 | 11 | 13 | 11 | 29 | 18* | 14 | 20 | 11 | 15 | 10 | 20 |
| <b>MA373 (T1)</b>           | 13 | 23 | 15 | 10 | 14,16 | 11 | 13 | 13 | 30 | 16  | 14 | 19 | 12 | 15 | 9  | 22 |
| <b>MA376 (J1(xJ1a,J1b))</b> | 12 | 23 | 15 | 10 | 13,18 | 11 | 13 | 11 | 29 | 18* | 14 | 20 | 11 | 15 | 10 | 20 |
| <b>MA377 (T1)</b>           | 13 | 23 | 15 | 10 | 14,16 | 11 | 13 | 13 | 30 | 16  | 14 | 19 | 12 | 15 | 9  | 22 |
| <b>MA378 (T1)</b>           | 13 | 23 | 15 | 10 | 14,16 | 11 | 13 | 13 | 30 | 16  | 14 | 19 | 12 | 15 | 9  | 21 |
| <b>MA379 (T1)</b>           | 13 | 23 | 15 | 10 | 14,16 | 11 | 14 | 13 | 31 | 16  | 14 | 19 | 12 | 15 | 9  | 22 |
| <b>MA380 (T1)</b>           | 13 | 23 | 15 | 10 | 15,16 | 11 | 14 | 13 | 31 | 16  | 14 | 19 | 12 | 15 | 9  | 23 |
| <b>MA381 (T1)</b>           | 13 | 23 | 15 | 10 | 14,16 | 11 | 13 | 13 | 30 | 16  | 14 | 19 | 12 | 14 | 9  | 21 |
| <b>MA382 (E1b1a)</b>        | 14 | 21 | 17 | 10 | 15,16 | 12 | 13 | 11 | 30 | 16  | 14 | 21 | 11 | 17 | 11 | 23 |
| <b>MA383 (T1)</b>           | 13 | 23 | 15 | 10 | 14,16 | 11 | 14 | 13 | 31 | 16  | 14 | 19 | 12 | 15 | 9  | 22 |
| <b>MA384 (J1(xJ1a,J1b))</b> | 12 | 23 | 15 | 10 | 13,18 | 11 | 13 | 11 | 29 | 18* | 14 | 20 | 11 | 15 | 10 | 20 |
| <b>MA385a (E1b1a)</b>       | 14 | 21 | 17 | 10 | 15,17 | 12 | 13 | 11 | 30 | 16  | 14 | 21 | 11 | 16 | 11 | 23 |
| <b>MA387 (T1)</b>           | 13 | 23 | 15 | 10 | 14,16 | 11 | 14 | 13 | 31 | 16  | 14 | 19 | 12 | 15 | 9  | 22 |
| <b>MA388 (T1)</b>           | 13 | 23 | 16 | 10 | 14,15 | 12 | 14 | 13 | 31 | 16  | 14 | 19 | 12 | 15 | 9  | 22 |
| <b>MA390 (T1)</b>           | 13 | 23 | 15 | 10 | 14,16 | 11 | 13 | 13 | 30 | 16  | 14 | 19 | 12 | 15 | 9  | 22 |
| <b>MA391 (E1b1b1)</b>       | 13 | 24 | 13 | 10 | 15,19 | 11 | 13 | 11 | 30 | 16  | 14 | 20 | 12 | 17 | 10 | 23 |
| <b>MA392 (T1)</b>           | 13 | 23 | 15 | 10 | 14,16 | 11 | 13 | 13 | 29 | 16  | 14 | 19 | 12 | 15 | 9  | 22 |
| <b>MA393 (T1)</b>           | 13 | 23 | 15 | 10 | 14,16 | 11 | 13 | 13 | 30 | 16  | 14 | 19 | 12 | 15 | 9  | 22 |
| <b>MA395 (T1)</b>           | 13 | 23 | 15 | 10 | 14,16 | 12 | 13 | 13 | 30 | 16  | 14 | 19 | 12 | 15 | 9  | 22 |
| <b>MA396 (E1b1a)</b>        | 13 | 22 | 15 | 10 | 16,18 | 12 | 14 | 12 | 33 | 17  | 14 | 21 | 10 | 15 | 11 | 21 |
| <b>MA397 (O2a1)</b>         | 14 | 25 | 15 | 11 | 20,21 | 12 | 13 | 13 | 29 | 16  | 14 | 18 | 11 | 16 | 10 | 25 |
| <b>MA399 (T1)</b>           | 13 | 23 | 15 | 10 | 14,16 | 11 | 13 | 13 | 30 | 16  | 14 | 19 | 12 | 15 | 9  | 22 |
| <b>MA400 (T1)</b>           | 13 | 23 | 15 | 10 | 14,16 | 11 | 13 | 13 | 30 | 16  | 14 | 19 | 12 | 15 | 9  | 21 |
| <b>MA404 (T1)</b>           | 13 | 23 | 15 | 10 | 14,16 | 11 | 14 | 13 | 31 | 16  | 14 | 19 | 12 | 15 | 9  | 22 |

|                   |                             |    |    |    |    |       |    |    |    |    |     |    |    |    |    |    |    |
|-------------------|-----------------------------|----|----|----|----|-------|----|----|----|----|-----|----|----|----|----|----|----|
|                   | <b>MA405 (T1)</b>           | 13 | 24 | 15 | 10 | 14,16 | 11 | 14 | 13 | 31 | 16  | 14 | 19 | 12 | 15 | 9  | 22 |
|                   | <b>MA407 (E1b1a)</b>        | 13 | 21 | 15 | 10 | 17,18 | 11 | 13 | 11 | 31 | 15  | 14 | 21 | 11 | 15 | 11 | 21 |
|                   | <b>MA408 (O2a1)</b>         | 14 | 25 | 15 | 11 | 15,2  | 12 | 13 | 13 | 29 | 15  | 14 | 18 | 11 | 14 | 10 | 22 |
|                   | <b>MA409 (T1)</b>           | 13 | 23 | 16 | 10 | 14,16 | 11 | 14 | 13 | 31 | 16  | 14 | 19 | 12 | 15 | 9  | 22 |
|                   | <b>MA410 (T1)</b>           | 13 | 23 | 15 | 10 | 14,16 | 11 | 14 | 13 | 31 | 16  | 14 | 19 | 12 | 15 | 9  | 22 |
|                   | <b>MA411 (J1(xJ1a,J1b))</b> | 12 | 23 | 15 | 10 | 13,18 | 11 | 13 | 11 | 29 | 18* | 14 | 20 | 11 | 15 | 10 | 21 |
|                   | <b>MA412 (E1b1a)</b>        | 13 | 21 | 15 | 11 | 16,17 | 11 | 13 | 11 | 31 | 18  | 14 | 21 | 11 | 15 | 11 | 21 |
| <b>Antalaotra</b> | <b>MA416 (O2a1)</b>         | 13 | 25 | 15 | 11 | 16,21 | 12 | 13 | 13 | 29 | 16  | 14 | 18 | 11 | 16 | 10 | 25 |
|                   | <b>MA417 (O1a2)</b>         | 13 | 23 | 16 | 10 | 13,13 | 11 | 12 | 14 | 28 | 15  | 14 | 16 | 12 | 15 | 10 | 22 |
|                   | <b>MA418 (E1b1a)</b>        | 14 | 21 | 17 | 10 | 18,18 | 13 | 13 | 11 | 30 | 17  | 14 | 21 | 11 | 15 | 11 | 21 |
|                   | <b>MA419 (O2a1)</b>         | 13 | 25 | 14 | 12 | 16,21 | 12 | 13 | 13 | 29 | 16  | 14 | 18 | 11 | 16 | 10 | 25 |
|                   | <b>MA420 (O2a1)</b>         | 14 | 25 | 15 | 11 | 16,23 | 12 | 13 | 13 | 29 | 16  | 14 | 18 | 11 | 16 | 10 | 25 |
|                   | <b>MA421 (J2b)</b>          | 13 | 24 | 15 | 10 | 13,17 | 11 | 12 | 11 | 29 | 16  | 15 | 18 | 11 | 13 | 9  | 21 |
|                   | <b>MA422 (E2b)</b>          | 13 | 25 | 14 | 11 | 13,19 | 11 | 12 | 11 | 28 | 16  | 14 | 19 | 11 | 15 | 11 | 25 |
|                   | <b>MA423 (E2b)</b>          | 13 | 25 | 14 | 11 | 13,19 | 11 | 12 | 11 | 28 | 17  | 14 | 19 | 11 | 15 | 11 | 25 |
|                   | <b>MA424 (J2b)</b>          | 13 | 24 | 15 | 11 | 13,18 | 12 | 12 | 11 | 29 | 16  | 15 | 18 | 11 | 13 | 9  | 21 |
|                   | <b>MA425 (E1b1a)</b>        | 13 | 21 | 15 | 11 | 16,17 | 11 | 13 | 11 | 31 | 18  | 14 | 21 | 11 | 15 | 11 | 21 |
|                   | <b>MA426 (E2b)</b>          | 13 | 25 | 14 | 11 | 13,19 | 11 | 12 | 11 | 28 | 17  | 14 | 19 | 11 | 15 | 11 | 25 |
|                   | <b>MA429 (E2b)</b>          | 13 | 25 | 14 | 12 | 13,19 | 11 | 12 | 11 | 28 | 17  | 14 | 19 | 11 | 14 | 11 | 26 |
|                   | <b>MA430 (E2b)</b>          | 13 | 25 | 14 | 11 | 13,19 | 11 | 12 | 11 | 28 | 17  | 14 | 19 | 11 | 15 | 11 | 24 |
|                   | <b>MA431 (J1(xJ1a,J1b))</b> | 12 | 23 | 15 | 10 | 13,18 | 11 | 13 | 11 | 29 | 18* | 14 | 20 | 11 | 15 | 10 | 20 |
|                   | <b>MA433 (J2b)</b>          | 13 | 24 | 15 | 11 | 13,18 | 12 | 12 | 11 | 30 | 16  | 15 | 18 | 11 | 13 | 9  | 21 |
|                   | <b>MA435 (J1(xJ1a,J1b))</b> | 12 | 23 | 15 | 10 | 13,19 | 11 | 13 | 11 | 29 | 18* | 14 | 20 | 11 | 15 | 10 | 20 |
|                   | <b>MA436 (O2a1)</b>         | 14 | 24 | 15 | 11 | 16,21 | 12 | 13 | 13 | 29 | 16  | 14 | 18 | 11 | 16 | 10 | 25 |
|                   | <b>MA437 (O1a2)</b>         | 13 | 23 | 16 | 10 | 15,15 | 11 | 12 | 14 | 28 | 19  | 14 | 16 | 12 | 16 | 10 | 22 |
|                   | <b>MA438 (J1(xJ1a,J1b))</b> | 12 | 23 | 15 | 10 | 13,19 | 11 | 13 | 11 | 29 | 18* | 14 | 20 | 11 | 15 | 10 | 20 |
|                   | <b>MA439 (E2b)</b>          | 13 | 25 | 14 | 11 | 13,19 | 11 | 12 | 11 | 28 | 17  | 14 | 19 | 11 | 15 | 11 | 25 |

|                      |    |    |    |    |       |    |    |    |    |     |    |    |    |    |    |    |
|----------------------|----|----|----|----|-------|----|----|----|----|-----|----|----|----|----|----|----|
| MA440 (O2a1)         | 13 | 25 | 15 | 11 | 16,21 | 12 | 13 | 13 | 29 | 17  | 14 | 18 | 11 | 16 | 10 | 25 |
| MA441 (O2a1)         | 14 | 25 | 16 | 11 | 16,21 | 12 | 13 | 13 | 29 | 16  | 14 | 18 | 11 | 16 | 10 | 25 |
| MA442 (O2a1)         | 14 | 24 | 15 | 11 | 16,21 | 12 | 13 | 13 | 29 | 16  | 14 | 18 | 11 | 16 | 10 | 25 |
| MA443 (O2a1)         | 14 | 25 | 15 | 11 | 16,21 | 12 | 13 | 13 | 29 | 16  | 14 | 18 | 11 | 16 | 10 | 25 |
| MA444 (O1a2)         | 13 | 23 | 15 | 10 | 13,14 | 11 | 12 | 14 | 28 | 19  | 14 | 16 | 12 | 16 | 10 | 21 |
| MA446 (T1)           | 13 | 23 | 15 | 10 | 14,16 | 11 | 13 | 13 | 30 | 17  | 14 | 19 | 12 | 15 | 9  | 22 |
| MA447 (O1a2)         | 13 | 23 | 16 | 10 | 13,13 | 11 | 12 | 14 | 28 | 15  | 14 | 16 | 12 | 16 | 10 | 22 |
| MA448 (O1a2)         | 13 | 23 | 16 | 10 | 13,13 | 11 | 12 | 14 | 28 | 15  | 14 | 16 | 12 | 16 | 10 | 21 |
| MA450 (J1(xJ1a,J1b)) | 12 | 23 | 15 | 10 | 13,18 | 11 | 13 | 11 | 29 | 18* | 14 | 20 | 11 | 15 | 10 | 20 |
| MA451 (O1a2)         | 13 | 23 | 17 | 10 | 13,14 | 11 | 12 | 14 | 30 | 19  | 14 | 16 | 12 | 16 | 10 | 22 |
| MA452 (O2a1)         | 13 | 23 | 16 | 10 | 13,14 | 11 | 12 | 14 | 29 | 19  | 14 | 16 | 12 | 16 | 10 | 21 |
| MA453 (O2a1)         | 13 | 25 | 15 | 11 | 16,21 | 12 | 13 | 13 | 29 | 16  | 14 | 18 | 11 | 16 | 10 | 24 |
| MA454 (R1a)          | 13 | 25 | 16 | 11 | 12,13 | 10 | 13 | 11 | 30 | 16  | 14 | 19 | 13 | 15 | 11 | 23 |
| MA455 (O2a1)         | 13 | 25 | 15 | 11 | 16,2  | 12 | 13 | 13 | 29 | 16  | 14 | 18 | 11 | 16 | 10 | 25 |
| MA456 (O1a2)         | 13 | 23 | 15 | 10 | 13,13 | 11 | 12 | 14 | 28 | 15  | 14 | 16 | 12 | 16 | 10 | 21 |
| MA458 (T1)           | 13 | 23 | 15 | 10 | 14,16 | 11 | 13 | 13 | 30 | 17  | 14 | 19 | 12 | 15 | 9  | 22 |
| MA459 (J1(xJ1a,J1b)) | 12 | 23 | 15 | 10 | 11,19 | 11 | 13 | 11 | 29 | 18* | 14 | 20 | 11 | 15 | 10 | 20 |
| MA460 (T1)           | 13 | 23 | 15 | 10 | 14,16 | 11 | 14 | 13 | 31 | 16  | 14 | 19 | 12 | 15 | 9  | 21 |
| MA462 (J1(xJ1a,J1b)) | 12 | 23 | 15 | 10 | 13,18 | 11 | 13 | 11 | 29 | 18* | 14 | 20 | 11 | 15 | 10 | 20 |
| MA463 (O2a1)         | 14 | 25 | 15 | 11 | 16,21 | 12 | 13 | 13 | 29 | 16  | 14 | 18 | 11 | 17 | 10 | 23 |
| MA465 (J1(xJ1a,J1b)) | 12 | 23 | 15 | 10 | 13,18 | 11 | 13 | 11 | 29 | 18* | 14 | 20 | 11 | 15 | 10 | 20 |
| MA468 (T1)           | 13 | 23 | 15 | 10 | 14,16 | 11 | 14 | 13 | 31 | 16  | 14 | 19 | 12 | 15 | 9  | 22 |
| MA469 (E1b1a)        | 14 | 21 | 15 | 10 | 15,19 | 14 | 13 | 11 | 30 | 16  | 14 | 21 | 12 | 15 | 11 | 21 |

\*DYS438 :18/19 variants not tested

**Table S2.** Database used for the analysis of Y haplogroup frequencies

| <b>Geographic group</b> | <b>Population</b>                | <b>n</b> | <b>References</b> |
|-------------------------|----------------------------------|----------|-------------------|
| <b>Africa CWS</b>       | Angola Cabinda                   | 74       | [1]               |
| <b>Africa CWS</b>       | Angola Nyaneka-Nkumbi            | 75       | [2]               |
| <b>Africa CWS</b>       | Angola Ovimbudu                  | 96       | [2]               |
| <b>Africa CWS</b>       | DRC (Pygmées Mbuti)              | 99       | [3]               |
| <b>Africa CWS</b>       | South Africa!Kung                | 100      | [3]               |
| <b>Africa CWS</b>       | South AfricaKhwe                 | 101      | [3]               |
| <b>Africa CWS</b>       | Rwanda Hutu                      | 98       | [4]               |
| <b>Africa CWS</b>       | Rwanda Tutsi                     | 100      | [4]               |
| <b>Africa CWS</b>       | Eastern Zambia                   | 69       | [5]               |
| <b>Africa CWS</b>       | Western Zambia Bantu west        | 197      | [5]               |
| <b>Africa CWS</b>       | Western Zambia Bantu east        | 283      | [5]               |
| <b>Africa CWS</b>       | Equatorial Guinea(estimation)    | 101      | [6]               |
| <b>Africa CWS</b>       | Benin                            | 78       | [7]               |
| <b>Africa CWS</b>       | Burkina Faso Fulbe               | 100      | [3]               |
| <b>Africa CWS</b>       | Burkina Faso Mossi               | 99       | [3]               |
| <b>Africa CWS</b>       | Burkina Faso Rimaibe             | 99       | [3]               |
| <b>Africa CWS</b>       | Cameroon Bakola                  | 100      | [3]               |
| <b>Africa CWS</b>       | Cameroon Bamileke                | 100      | [3]               |
| <b>Africa CWS</b>       | Cameroon Daba                    | 100      | [3]               |
| <b>Africa CWS</b>       | Cameroon Ewondo                  | 100      | [3]               |
| <b>Africa CWS</b>       | Cameroon Fali                    | 100      | [3]               |
| <b>Africa CWS</b>       | Cameroon Fulbe                   | 101      | [3]               |
| <b>Africa CWS</b>       | Cameroon various Adamawa         | 102      | [3]               |
| <b>Africa CWS</b>       | Cameroon various Chadic          | 102      | [3]               |
| <b>Africa CWS</b>       | Cameroon Nilo-Sahara             | 99       | [3]               |
| <b>Africa CWS</b>       | Cameroon Tali                    | 101      | [3]               |
| <b>Africa CWS</b>       | Cameroon Uldeme                  | 100      | [3]               |
| <b>Africa CWS</b>       | Central Africa Republic Lissongo | 140      | [3]               |
| <b>Africa CWS</b>       | Cabo Verde Northern              | 101      | [8]               |
| <b>Africa CWS</b>       | Cabo Verde Southern              | 100      | [8]               |
| <b>Africa CWS</b>       | Benin Fon                        | 100      | [4]               |
| <b>Africa CWS</b>       | Cameroon Bantu                   | 99       | [4]               |
| <b>Africa CWS</b>       | Senegal various                  | 139      | [9]               |
| <b>Eastern Africa</b>   | Tanzania Datoga                  | 101      | [10]              |
| <b>Eastern Africa</b>   | Tanzania Hadzabe                 | 99       | [10]              |
| <b>Eastern Africa</b>   | Kenya Bantu                      | 81       | [4]               |
| <b>Eastern Africa</b>   | Tanzania Wairak                  | 100      | [4]               |
| <b>Eastern Africa</b>   | Somalia various Danish           | 196      | [11]              |
| <b>Eastern Africa</b>   | Kenya                            | 79       | [12]              |
| <b>Eastern Africa</b>   | Karamoja, Uganda                 | 118      | [13]              |
| <b>Eastern Africa</b>   | Kenya Maasai                     | 79       | [5]               |
| <b>Eastern Africa</b>   | Ethiopia Jew                     | 101      | [3]               |



---

|                                  |                          |     |                           |
|----------------------------------|--------------------------|-----|---------------------------|
| <b>Eastern Africa</b>            | Ethiopia Amhara          | 48  | [9]                       |
| <b>Eastern Africa</b>            | Ethiopia Oromo           | 78  | [9]                       |
| <b>Eastern Africa</b>            | Ethiopia Omo valley      | 98  | [5]                       |
| <b>Eastern Africa</b>            | Somalia                  | 201 | [14]                      |
| <b>Northern Africa</b>           | Namibia                  | 136 | [12]                      |
| <b>Northern Africa</b>           | Egypt                    | 147 | [14]                      |
| <b>Northern Africa</b>           | Algeria various          | 100 | [15]                      |
| <b>Northern Africa</b>           | Lybia Arabs (estimation) | 51  | [16]                      |
| <b>Northern Africa</b>           | Morocco Arabs            | 100 | [3]                       |
| <b>Northern Africa</b>           | Morocco Berbers          | 101 | [3]                       |
| <b>Northern Africa</b>           | Morocco                  | 312 | [17]                      |
| <b>Northern Africa</b>           | Tunisia                  | 148 | [18]                      |
| <b>Southern Asia</b>             | Pakistan                 | 176 | [14]                      |
| <b>Southern Asia</b>             | Naikpod                  | 68  | [19]                      |
| <b>Southern Asia</b>             | Andh                     | 53  | [19]                      |
| <b>Southern Asia</b>             | Pardhan                  | 128 | [19]                      |
| <b>Southern Asia</b>             | Mahadeokoli              | 50  | [20]                      |
| <b>Southern Asia</b>             | Thakar                   | 48  | [20]                      |
| <b>Southern Asia</b>             | Muslim Shia              | 161 | [21]                      |
| <b>Southern Asia</b>             | Muslim Sunni             | 129 | [21]                      |
| <b>Southern Asia</b>             | Northern India           | 80  | [22]                      |
| <b>Southern Asia</b>             | Northeastern India       | 87  | [22]                      |
| <b>Southern Asia</b>             | Eastern India            | 128 | [22]                      |
| <b>Southern Asia</b>             | Southern India           | 303 | [22]                      |
| <b>Southern Asia</b>             | Central India            | 71  | [22]                      |
| <b>Southern Asia</b>             | Western India            | 59  | [22]                      |
| <b>Western Europe</b>            | Northern Portugal        | 60  | [23]                      |
| <b>Western Europe</b>            | Southern Portugal        | 78  | [23]                      |
| <b>Western Europe</b>            | Portugueses Jew          | 86  | [24]                      |
| <b>Western Europe</b>            | France                   | 57  | (Balaresque, unpublished) |
| <b>Western Europe</b>            | Basque                   | 116 | [23]                      |
| <b>Western Europe</b>            | East Andalusia           | 95  | [23]                      |
| <b>Western Europe</b>            | Galicia                  | 88  | [23]                      |
| <b>Western Europe</b>            | Northwestern Castilla    | 100 | [23]                      |
| <b>West Indian Ocean islands</b> | Antandroy                | 46  | [25]                      |
| <b>West Indian Ocean islands</b> | Antanosy                 | 47  | [25]                      |
| <b>West Indian Ocean islands</b> | Comoros                  | 381 | [26]                      |
| <b>West Indian Ocean islands</b> | Mikea Mikea-vezo         | 59  | [27]                      |
| <b>West Indian Ocean islands</b> | Vezo Northern Tulear     | 16  | [27]                      |
| <b>West Indian Ocean islands</b> | Vezo Southern Tulear     | 32  | [27]                      |
| <b>West Indian Ocean islands</b> | Highlands Madagascar     | 35  | [28]                      |

---

---

|                      |                                  |     |           |
|----------------------|----------------------------------|-----|-----------|
| <b>Middle East</b>   | Israel Druzes Galilee            | 173 | [29]      |
| <b>Middle East</b>   | Palestinian                      | 290 | [17]      |
| <b>Middle East</b>   | Koweït Bedouins                  | 148 | [30]      |
| <b>Middle East</b>   | Soqotra various                  | 63  | [31]      |
| <b>Middle East</b>   | Saudi Arabia                     | 157 | [14]      |
| <b>Middle East</b>   | Qatar                            | 72  | [14]      |
| <b>Middle East</b>   | UAE                              | 164 | [32]      |
| <b>Middle East</b>   | Oman                             | 121 | [32]      |
| <b>Middle East</b>   | Yemen                            | 62  | [32]      |
| <b>Middle East</b>   | Liban                            | 916 | [33]      |
| <b>Middle East</b>   | Jordan                           | 146 | [34]      |
| <b>Middle East</b>   | Irak                             | 203 | [35] [36] |
| <b>Middle East</b>   | Iran                             | 150 | [37]      |
| <b>Middle East</b>   | Syrians                          | 518 | [17] [38] |
| <b>Middle East</b>   | Iranians                         | 324 | [39]      |
| <b>Middle East</b>   | Cypriots                         | 165 | [38]      |
| <b>Middle East</b>   | Turks various                    | 58  | [35]      |
| <b>Middle East</b>   | Turks Anatolie                   | 488 | [40]      |
| <b>Oceania</b>       | Vanuatu-Maewo                    | 44  | [41]      |
| <b>Oceania</b>       | South western New Guinea Una     | 46  | [42]      |
| <b>Oceania</b>       | Papouasie New Guinea Trobriand   | 53  | [42]      |
| <b>Oceania</b>       | Papouasie New Guinea Kapuna      | 46  | [42]      |
| <b>Oceania</b>       | Cook                             | 66  | [42]      |
| <b>Oceania</b>       | Futuna                           | 50  | [42]      |
| <b>Oceania</b>       | Fidji                            | 94  | [42]      |
| <b>Oceania</b>       | Tuvalu                           | 100 | [42]      |
| <b>Oceania</b>       | Western Samoa                    | 61  | [42]      |
| <b>Southern Asia</b> | Nias                             | 407 | [43]      |
| <b>Southern Asia</b> | Philippines                      | 48  | [41]      |
| <b>Southern Asia</b> | Vietnam                          | 70  | [41]      |
| <b>Southern Asia</b> | Bali                             | 641 | [41]      |
| <b>Southern Asia</b> | Java                             | 61  | [41]      |
| <b>Southern Asia</b> | Bornéo                           | 86  | [41]      |
| <b>Southern Asia</b> | Nias                             | 60  | [41]      |
| <b>Southern Asia</b> | Mentawai                         | 74  | [41]      |
| <b>Southern Asia</b> | Flores                           | 394 | [41]      |
| <b>Southern Asia</b> | Sulawesi                         | 54  | [41]      |
| <b>Southern Asia</b> | Sumba                            | 350 | [41]      |
| <b>Southern Asia</b> | Lembata                          | 92  | [41]      |
| <b>Southern Asia</b> | Adonara (Austronesian language ) | 96  | [44]      |
| <b>Southern Asia</b> | Flores (Austronesian language )  | 71  | [44]      |
| <b>Southern Asia</b> | Solor (Austronesian language )   | 43  | [44]      |
| <b>Southern Asia</b> | Sumatra                          | 56  | [42]      |
| <b>Southern Asia</b> | Java                             | 53  | [42]      |
| <b>Southern Asia</b> | Negritos                         | 180 | [45]      |

---

|                      |              |     |      |
|----------------------|--------------|-----|------|
| <b>Southern Asia</b> | Non Negritos | 210 | [42] |
| <b>Southern Asia</b> | Malaysia     | 32  | [41] |

**Table S3.** Database used for the analysis of the seven Y-STR markers

| <b>Geographic group</b>          | <b>Population</b>         | <b>n</b> | <b>References</b> |
|----------------------------------|---------------------------|----------|-------------------|
| <b>West Indian Ocean islands</b> | Antandroy                 | 46       | [25]              |
| <b>West Indian Ocean islands</b> | Antanosy                  | 47       | [25]              |
| <b>West Indian Ocean islands</b> | Antaisaka                 | 8        | [25]              |
| <b>West Indian Ocean islands</b> | Merina                    | 9        | [25]              |
| <b>West Indian Ocean islands</b> | Comoros                   | 291      | [26]              |
| <b>West Indian Ocean islands</b> | Mikea                     | 59       | [27]              |
| <b>West Indian Ocean islands</b> | Vezo Northern Tulear      | 16       | [27]              |
| <b>West Indian Ocean islands</b> | Vezo Southern Tulear      | 32       | [27]              |
| <b>West Indian Ocean islands</b> | Tsimahafotsy              | 5        | [27]              |
| <b>West Indian Ocean islands</b> | Andriana                  | 21       | [27]              |
| <b>Africa CWS</b>                | Equatorial Guinea         | 101      | [6]               |
| <b>Africa CWS</b>                | Gabon                     | 828      | [46]              |
| <b>Africa CWS</b>                | Benin                     | 78       | [7]               |
| <b>Africa CWS</b>                | Ivory coast               | 90       | [7]               |
| <b>Africa CWS</b>                | African Central Republic  | 165      | [47]              |
| <b>Africa CWS</b>                | Guinea-Bissau             | 161      | [48]              |
| <b>Africa CWS</b>                | Burkina Faso              | 323      | [5]               |
| <b>Africa CWS</b>                | Mozambique                | 154      | [49]              |
| <b>Africa CWS</b>                | Angola Nyaneka            | 75       | [2]               |
| <b>Africa CWS</b>                | Angola Ovimbudu           | 96       | [2]               |
| <b>Africa CWS</b>                | Angola various            | 65       | [2]               |
| <b>Africa CWS</b>                | Zambia Eastern            | 88       | [5]               |
| <b>Africa CWS</b>                | Zambia Western Bantu east | 263      | [5]               |
| <b>Africa CWS</b>                | Zambia Western Bantu west | 192      | [5]               |
| <b>Africa CWS</b>                | Namibia                   | 54       | [50]              |
| <b>Eastern Africa</b>            | Ethiopia Omo valley       | 67       | [5]               |
| <b>Eastern Africa</b>            | Kenya Massai              | 55       | [5]               |
| <b>Eastern Africa</b>            | Tanzania Sandawa          | 66       | [51]              |
| <b>Eastern Africa</b>            | Tanzania various          | 132      | [51]              |
| <b>Eastern Africa</b>            | Uganda                    | 118      | [13]              |
| <b>Northern Africa</b>           | Lybia                     | 63       | [16]              |
| <b>Northern Africa</b>           | Morocco                   | 515      | [17]              |
| <b>Northern Africa</b>           | Morocco Arabs various     | 104      | [52]              |
| <b>Northern Africa</b>           | Mozabites                 | 68       | [53]              |
| <b>Northern Africa</b>           | Tunisia Sfax various      | 105      | [54]              |
| <b>Middle East</b>               | Iran Iranians             | 128      | [55]              |

---

|                          |                    |     |                           |
|--------------------------|--------------------|-----|---------------------------|
| <b>Middle East</b>       | Druze d'Israel     | 234 | [29]                      |
| <b>Middle East</b>       | Liban              | 650 | [29,33]                   |
| <b>Middle East</b>       | Palestine          | 364 | [17]                      |
| <b>Middle East</b>       | Koweït             | 148 | [30]                      |
| <b>Middle East</b>       | Oman               | 99  | [56]                      |
| <b>Middle East</b>       | Saudi Arabia       | 106 | [56]                      |
| <b>Middle East</b>       | Yemen              | 104 | [56]                      |
| <b>Middle East</b>       | Dubai              | 217 | [56]                      |
| <b>Middle East</b>       | Iran various       | 104 | [56]                      |
| <b>Middle East</b>       | Cyprus             | 163 | [33]                      |
| <b>Middle East</b>       | Syria Syrians      | 161 | [33]                      |
| <b>Middle East</b>       | Turks various      | 140 | [57]                      |
| <b>Middle East</b>       | Turks Anatolia     | 520 | [40]                      |
| <b>Southern Asia</b>     | Bangladesh         | 284 | [58]                      |
| <b>Southern Asia</b>     | Saraswat Brahmin   | 122 | [59]                      |
| <b>Southern Asia</b>     | Indian Tamils Nadu | 152 | [60]                      |
| <b>Southern Asia</b>     | Jat Sikhs          | 80  | [61]                      |
| <b>Southern Asia</b>     | India Northern     | 78  | [22]                      |
| <b>Southern Asia</b>     | India Eastern      | 127 | [22]                      |
| <b>Southern Asia</b>     | India Southern     | 295 | [22]                      |
| <b>Southern Asia</b>     | India Central      | 69  | [22]                      |
| <b>Southern Asia</b>     | India Western      | 59  | [22]                      |
| <b>Southern Asia</b>     | Mahadeokoli        | 50  | [20]                      |
| <b>Southern Asia</b>     | Thakar             | 48  | [20]                      |
| <b>Southern Asia</b>     | Pakistan           | 177 | [22]                      |
| <b>Southern Asia</b>     | Sri-Lanka          | 207 | [62]                      |
| <b>Western Europe</b>    | France             | 57  | (Balaresque, unpublished) |
| <b>Western Europe</b>    | Northern Portugal  | 60  | [23]                      |
| <b>Western Europe</b>    | Southern Portugal  | 78  | [23]                      |
| <b>Western Europe</b>    | Eastern Andalousia | 95  | [23]                      |
| <b>Western Europe</b>    | Galiccia           | 89  | [23]                      |
| <b>Western Europe</b>    | Northern Castilla  | 130 | [23]                      |
| <b>Western Europe</b>    | Portuguses Jew     | 86  | [24]                      |
| <b>Southeastern Asia</b> | Philippines        | 76  | [63]                      |
| <b>Southeastern Asia</b> | Malays Singapour   | 180 | [64]                      |
| <b>Southeastern Asia</b> | Malays Malaysia    | 334 | [65]                      |
| <b>Southeastern Asia</b> | Iban               | 105 | [66]                      |
| <b>Southeastern Asia</b> | Bidayuh            | 113 | [66]                      |
| <b>Southeastern Asia</b> | Melanau            | 104 | [66]                      |
| <b>Southeastern Asia</b> | Timor              | 113 | [67]                      |
| <b>Southeastern Asia</b> | Flores             | 385 | (Karafet unpublished)     |
| <b>Southeastern Asia</b> | Lembata            | 89  | (Karafet unpublished)     |
| <b>Southeastern Asia</b> | Sumba              | 349 | (Karafet unpublished)     |
| <b>Southeastern Asia</b> | Vietnam            | 113 | (Karafet unpublished)     |
| <b>Southeastern Asia</b> | Bali               | 632 | (Karafet unpublished)     |

---

|                          |                      |    |                       |
|--------------------------|----------------------|----|-----------------------|
| <b>Southeastern Asia</b> | Borneo               | 85 | (Karafet unpublished) |
| <b>Southeastern Asia</b> | Java                 | 61 | (Karafet unpublished) |
| <b>Southeastern Asia</b> | Mentawai             | 73 | (Karafet unpublished) |
| <b>Southeastern Asia</b> | Nias                 | 60 | (Karafet unpublished) |
| <b>Southeastern Asia</b> | Thailand             | 41 | [63]                  |
| <b>Oceania</b>           | Oceania various      | 66 | (Karafet unpublished) |
| <b>Oceania</b>           | Papouasie New Guinea | 47 | (Karafet unpublished) |
| <b>Oceania</b>           | Tahiti               | 24 | (Karafet unpublished) |
| <b>Oceania</b>           | Vanuatu              | 44 | (Karafet unpublished) |

**Table S4.** J1 haplotype references used for the median-joining network

| <b>Country</b>      | <b>Group</b>    | <b>n</b> | <b>References</b>     |            |
|---------------------|-----------------|----------|-----------------------|------------|
| <b>Afghanistan</b>  | Middle East     | 1        | [25]                  |            |
| <b>Algeria</b>      | Northern Africa | 23       | [15]                  |            |
| <b>Saudi Arabia</b> | Middle East     | 48       | [14]                  |            |
| <b>Assyrian</b>     | Middle East     | 14       | [140]                 |            |
| <b>Bali</b>         | Southern Asia   | 6        | (Karafet unpublished) |            |
| <b>Cyprus</b>       | Middle East     | 18       | [17]                  |            |
| <b>Comoros</b>      | Comoros         | 18       | [26]                  |            |
| <b>Daghestan</b>    | Europe          | 87       | [141]                 |            |
| <b>Egypt</b>        | Northern Africa | 29       | [140]                 |            |
| <b>Egypt</b>        | Northern Africa | 2        | [140]                 |            |
| <b>Ethiopia</b>     | Eastern Africa  | 21       | [141]                 |            |
| <b>India</b>        | Southern Asia   | 2        | [22]                  |            |
| <b>Iran</b>         | Middle East     | 4        | [140]                 |            |
| <b>Irak</b>         | Middle East     | 11       | [140]                 |            |
| <b>Irak</b>         | Middle East     | 15       | [141]                 |            |
| <b>Israel</b>       | Middle East     | 32       | [29]                  |            |
| <b>Israel</b>       | Middle East     | 19       | [140]                 |            |
| <b>Italia</b>       | Europe          | 26       | [141]                 |            |
| <b>Jordan</b>       | Middle East     | 35       | [140]                 |            |
| <b>Koweït</b>       | Middle East     | 1        | [30]                  |            |
| <b>Kurds</b>        | Middle East     | 4        | [141]                 |            |
| <b>Liban</b>        | Middle East     | 7        | [29]                  |            |
| <b>Lybia</b>        | Northern Africa | 1        | [16]                  | Estimation |
| <b>Morocco</b>      | Northern Africa | 9        | [17]                  |            |
| <b>Morocco</b>      | Northern Africa | 9        | [141]                 |            |
| <b>Montenegro</b>   | Europe          | 2        | [142]                 | Estimation |
| <b>Oman</b>         | Middle East     | 37       | [140]                 |            |
| <b>Oman</b>         | Middle East     | 19       | [141]                 |            |
| <b>Pakistan</b>     | Southern Asia   | 4        | [22]                  |            |
| <b>Palestine</b>    | Middle East     | 100      | [17]                  |            |
| <b>Palestine</b>    | Middle East     | 16       | [140]                 |            |
| <b>Parsi</b>        | Southern Asia   | 3        | [141]                 |            |

|                     |                 |    |       |            |
|---------------------|-----------------|----|-------|------------|
| <b>Persia</b>       | Middle East     | 5  | [141] |            |
| <b>Portugal</b>     | Europe          | 22 | [141] |            |
| <b>Qatar</b>        | Middle East     | 41 | [140] |            |
| <b>Qatar</b>        | Middle East     | 1  | [140] |            |
| <b>Qatar</b>        | Middle East     | 20 | [141] |            |
| <b>Saudi Arabia</b> | Middle East     | 4  | [140] |            |
| <b>Serbia</b>       | Europe          | 1  | [142] | Estimation |
| <b>Sudan</b>        | Eastern Africa  | 26 | [141] |            |
| <b>Syria</b>        | Middle East     | 62 | [140] |            |
| <b>Syria</b>        | Middle East     | 8  | [140] |            |
| <b>Syria</b>        | Middle East     | 38 | [17]  |            |
| <b>Syria</b>        | Middle East     | 9  | [29]  |            |
| <b>Tunisia</b>      | Northern Africa | 17 | [141] |            |
| <b>Turkey</b>       | Middle East     | 18 | [40]  |            |
| <b>UAE</b>          | Middle East     | 57 | [140] |            |
| <b>Yemen</b>        | Middle East     | 42 | [140] |            |
| <b>Yemen</b>        | Middle East     | 3  | [140] |            |

**Table S5.** T1 haplotype references used for the median-joining network

| <b>Country</b>                             | <b>Group</b>      | <b>n</b> | <b>References</b>                                                |            |
|--------------------------------------------|-------------------|----------|------------------------------------------------------------------|------------|
| <b>Angola</b>                              | Subsaharan Africa | 1        | [143]                                                            | Estimation |
| <b>Argentina-(Native-American)</b>         | America           | 1        | [144]                                                            |            |
| <b>Belgium</b>                             | Europe            | 1        | (Decorte <i>et al.</i> 2004 YHRD)                                |            |
| <b>Brazil– Alagoas (Admixed-Brazilian)</b> | America           | 10       | (Azevedo 2009 YHRD)                                              |            |
| <b>British non Jefferson</b>               | Europe            | 2        | [145]                                                            |            |
| <b>China</b>                               | Eastern Asia      | 1        | [146]                                                            |            |
| <b>China</b>                               | Eastern Asia      | 1        | [22]                                                             |            |
| <b>Egypt</b>                               | Northern Africa   | 4        | [18]                                                             |            |
| <b>Equatorial Guinea</b>                   | Subsaharan Africa | 1        | [6]                                                              | Estimation |
| <b>Spain</b>                               | Europe            | 1        | [23]                                                             | Estimation |
| <b>French</b>                              | Europe            | 3        | [141]                                                            |            |
| <b>Iberic peninsula</b>                    | Europe            | 13       | [141]                                                            |            |
| <b>Israel</b>                              | Middle East       | 11       | [29]                                                             |            |
| <b>Italia-Modena</b>                       | Europe            | 3        | (Ferri <i>et al.</i> 2008 YHRD)                                  |            |
| <b>Koweït</b>                              | Middle East       | 1        | [30]                                                             |            |
| <b>Liban</b>                               | Middle East       | 23       | [33]                                                             |            |
| <b>Lybia</b>                               | Northern Africa   | 2        | [16]                                                             | Estimation |
| <b>Macedonia</b>                           | Europe            | 4        | (Spiroski <i>et al.</i> 2005 ; Jakovski <i>et al.</i> 2011 YHRD) |            |
| <b>Mediterranean</b>                       | Europe            | 1        | [23]                                                             | Estimation |
| <b>Netherdlands</b>                        | Europe            | 1        | (Decorte <i>et al.</i> 2004 YHRD)                                |            |
| <b>Palestine</b>                           | Middle East       | 6        | [17]                                                             |            |
| <b>Portugal</b>                            | Europe            | 2        | [22]                                                             |            |
| <b>Portugal</b>                            | Europe            | 10       | [24]                                                             |            |
| <b>Syria</b>                               | Middle East       | 3        | [17]                                                             |            |

---

|                            |                   |    |                       |            |
|----------------------------|-------------------|----|-----------------------|------------|
| <b>Tunisia</b>             | Northern Africa   | 4  | [17]                  |            |
| <b>Turkey</b>              | Middle East       | 13 | [40]                  |            |
| <b>Uganda</b>              | Subsaharan Africa | 1  | [13]                  |            |
| <b>USA-Nevada-(Basque)</b> | America           | 1  | (Valverde Potes YHRD) |            |
| <b>Virginia Jefferson</b>  | Europe            | 6  | [141]                 |            |
| <b>Zambia</b>              | Subsaharan Africa | 1  | [5]                   | Estimation |

---

**Table S6.** HVI and HVII profiles in the Antemoro

| <b>Groups</b>     | <b>ID</b>     | <b>HVI</b>                                                   | <b>HVII</b>                       | <b>HG</b> |
|-------------------|---------------|--------------------------------------------------------------|-----------------------------------|-----------|
| <b>Ampanabaka</b> | <b>MA302</b>  | 16124 16223 16319                                            | 73 150 152 263                    | L3d       |
|                   | <b>MA303</b>  | 16182C 16183C 16189 16223 16278 16290 16294 16390            | 73 146 152 195                    | L2a1      |
|                   | <b>MA304</b>  | 16223 16295 16362 16519                                      | 73 146 199 263                    | M7c3c     |
|                   | <b>MA305</b>  | 16093 16223 16278 16362 16519                                | 73 263                            | L3b       |
|                   | <b>MA307</b>  | 16223 16278 16311 16362 16519                                | 73 263                            | L3b       |
|                   | <b>MA308</b>  | 16223 16265T 16519                                           | 73 150 195 263                    | L3e3      |
|                   | <b>MA311</b>  | 16172 16183C 16189 16213 16223 16320 16519                   | 73 150 152 195                    | L3e2b3    |
|                   | <b>MA312</b>  | 16223 16295 16362 16519                                      | 73 146 199 263                    | M7c3c     |
|                   | <b>MA313</b>  | 16086 16148 16223 16259 16278 16311 16319 16399 16526        | 73 150 200 263                    | M32c      |
|                   | <b>MA 315</b> | 16189 16192 16223 16256 16278 16294 16309 16344 16390 16519  | 73 146 152 195 263                | L2a1      |
|                   | <b>MA316</b>  | 16148 16172 16187 16188G 16189 16223 16230 16311 16320 16519 | 64 93 152 185 189 204 207 247 263 | L0a2      |
|                   | <b>MA317</b>  | 16182C 16183C 16189 16217 16247 16261 16519                  | 73 146 195                        | B4a1a1a   |
|                   | <b>MA318</b>  | 16223 16265T 16519                                           | 73 150 195 263                    | L3e3      |
|                   | <b>MA320</b>  | 16129 16182C 16183C 16189 16217 16247 16261 16290 16519      | 71 73 146                         | B4a1a1a   |
|                   | <b>MA322</b>  | 16182C 16183C 16189 16217 16247 16261 16519                  | 73 146                            | B4a1a1a   |
|                   | <b>MA323</b>  | 16182C 16183C 16189 16217 16247 16261 16519                  | 73 146                            | B4a1a1a   |
|                   | <b>MA324</b>  | 16148 16172 16187 16188G 16189 16223 16230 16311 16320 16519 | 64 93 152 189 204 207 236 247 263 | L0a2      |
|                   | <b>MA325</b>  | 16182C 16183C 16189 16217 16247 16261 16519                  | 73 146                            | B4a1a1a   |
|                   | <b>MA326</b>  | 16182C 16183C 16189 16217 16247 16261 16519                  | 73 146                            | B4a1a1a   |
|                   | <b>MA327</b>  | 16182C 16183C 16189 16217 16247 16261 16519                  | 73 146                            | B4a1a1a   |
|                   | <b>MA328</b>  | 16220C 16265 16298 16362                                     | 73 150 152 200 249d 263           | F3b       |
|                   | <b>MA329</b>  | 16182C 16183C 16189 16217 16247 16261 16519                  | 73 146 252                        | B4a1a1a   |
|                   | <b>MA330</b>  | 16093 16223 16278 16362 16519                                | 73 263                            | L3b       |
|                   | <b>MA331</b>  | 16093 16223 16278 16362 16519                                | 73 263                            | L3b       |
|                   | <b>MA332</b>  | 16223 16263 16311 16519                                      | 73 152 195 204                    | M23       |
|                   | <b>MA333</b>  | 16220C 16265 16298 16362                                     | 73 150 152 200 249d 263           | F3b       |



|                |              |                                                                                |                                   |         |
|----------------|--------------|--------------------------------------------------------------------------------|-----------------------------------|---------|
|                | <b>MA335</b> | 16223 16263 16311 16519                                                        | 73 152 195 204 263                | M23     |
|                | <b>MA337</b> | 16182C 16183C 16189 16223 16278 16290 16294 16309 16390                        | 73 146 152 195                    | L2a1    |
|                | <b>MA338</b> | 16182C 16183C 16189 16217 16247 16261 16519                                    | 73 146                            | B4a1a1a |
|                | <b>MA339</b> | 16093 16124 16217 16223 16278 16362 16519                                      | 73 263                            | L3b     |
|                | <b>MA340</b> | 16189 16223 16278 16294 16309 16390 16519                                      | 73 146 152 195 198                | L2a1    |
|                | <b>MA341</b> | 16221 16223 16291 16362 16390 16519                                            | 73 263                            | E1a     |
|                | <b>MA342</b> | 16223 16295 16362 16519                                                        | 73 146 199 263                    | M7c3c   |
|                | <b>MA343</b> | 16182C 16183C 16189 16217 16247 16261 16519                                    | 73 146                            | B4a1a1a |
|                | <b>MA344</b> | 16182C 16183C 16189 16217 16247 16261 16519                                    | 73 146                            | B4a1a1a |
|                | <b>MA345</b> | 16223 16295 16362 16519                                                        | 73 146 199 263                    | M7c3c   |
|                | <b>MA346</b> | 16185 16223 16327 16519                                                        | 73 150 189 200 263                | L3e1a   |
|                | <b>MA349</b> | 16182C 16183C 16189 16223 16278 16290 16294 16309 16390                        | 73 146 152 195                    | L2a1    |
|                | <b>MA350</b> | 16223 16265T 16519                                                             | 73 150 195 263                    | L3e3    |
|                | <b>MA351</b> | 16148 16172 16187 16188G 16189 16223 16230 16311 16320 16519                   | 64 93 152 189 204 207 236 247 263 | L0a2    |
|                | <b>MA352</b> | 16093 16223 16278 16362 16519                                                  | 73 263                            | L3b     |
|                | <b>MA353</b> | 16221 16223 16291 16362 16390 16519                                            | 73 263                            | E1a     |
|                | <b>MA354</b> | 16220C 16265 16298 16362                                                       | 73 150 152 249d 263               | F3b     |
|                | <b>MA355</b> | 16223 16265T 16519                                                             | 73 150 195 263                    | L3e3    |
|                | <b>MA356</b> | 16172 16183C 16189 16213 16223 16320 16519                                     | 73 150 152 195                    | L3e2b3  |
|                | <b>MA408</b> | 16185 16223 16327 16519                                                        | 73 150 189 200 263                | L3e1a   |
|                | <b>MA452</b> | 16172 16223 16295 16362 16359                                                  | 73 146 199 263                    | M7c3c   |
|                | <b>MA358</b> | 16182C 16183C 16189 16217 16247 16261 16519                                    | 73 146                            | B4a1a1a |
| <b>Anteony</b> | <b>MA359</b> | 16093 16172 16223 16278 16311 16362 16519                                      | 73 263                            | L3b     |
|                | <b>MA360</b> | 16129 16148 16168 16172 16187 16188G 16189 16223 16230 16278 16293 16311 16320 | 93 95C 185 189 236 247 263        | L0a1'4  |
|                | <b>MA361</b> | 16223 16263 16311 16519                                                        | 73 152 195 204 263                | M23     |
|                | <b>MA362</b> | 16093 16223 16278 16362 16519                                                  | 73 263                            | L3b     |
|                | <b>MA363</b> | 16220C 16265 16298 16362                                                       | 73 150 152 249d 263               | F3b     |
|                | <b>MA364</b> | 16169 16213 16223 16240C 16254 16316 16335                                     | 73 152 263                        | L3a     |
|                | <b>MA365</b> | 16182C 16183C 16189 16217 16247 16261 16291 16519                              | 73 146                            | B4a1a1a |

---

|              |                                                                                |                                 |         |
|--------------|--------------------------------------------------------------------------------|---------------------------------|---------|
| <b>MA367</b> | 16223 16278 16362 16519                                                        | 73 263                          | L3b     |
| <b>MA369</b> | 16220C 16265 16298 16362                                                       | 73 150 152 200 249d 263         | F3b     |
| <b>MA370</b> | 16223 16263 16311 16519                                                        | 73 152 195 204 263              | M23     |
| <b>MA371</b> | 16182C 16183C 16189 16217 16247 16261 16519                                    | 73 146                          | B4a1a1a |
| <b>MA373</b> | 16093 16223 16274 16278 16362 16519                                            | 73 263                          | L3b     |
| <b>MA374</b> | 16265T 16292 16519                                                             | 73 150 195 263                  | L3e3    |
| <b>MA375</b> | 16172 16183C 16189 16223 16320 16519                                           | 73 150 195                      | L3e2b   |
| <b>MA376</b> | 16182C 16183C 16189 16223 16278 16290 16294 16309 16390                        | 73 146 152 195                  | L2a1    |
| <b>MA377</b> | 16172 16223 16263 16311 16519                                                  | 73 152 195 204 263              | M23     |
| <b>MA378</b> | 16124 16223 16319                                                              | 73 150 152 263                  | L3d     |
| <b>MA380</b> | 16223 16278 16362 16519                                                        | 73 263                          | L3b     |
| <b>MA381</b> | 16223 16295 16362 16519                                                        | 73 146 199 263                  | M7c3c   |
| <b>MA382</b> | 16220C 16265 16298 16362                                                       | 73 150 152 249d 263             | F3b     |
| <b>MA383</b> | 16182C 16183C 16189 16223 16278 16290 16294 16309 16390                        | 73 146 152 195                  | L2a1    |
| <b>MA384</b> | 16182C 16183C 16189 16217 16261 16519                                          | 73 146                          | B4a1a1a |
| <b>MA385</b> | 16129 16148 16168 16172 16187 16188G 16189 16223 16230 16278 16293 16311 16320 | 93 95C 185 189 194G 236 247 263 | L0a1'4  |
| <b>MA386</b> | 16086 16148 16223 16259 16278 16319 16399 16526                                | 73 150 195 200 263              | M32c    |
| <b>MA388</b> | 16223 16266 16278 16294 16309 16390 16519                                      | 73 146 152 195 263              | L2a1    |
| <b>MA389</b> | 16223 16278 16362 16519                                                        | 73 263                          | L3b     |
| <b>MA390</b> | 16189 16265T 16292 16519                                                       | 73 150 195                      | L3e3    |
| <b>MA391</b> | 16220C 16265 16298 16362                                                       | 73 150 152 249d 263             | F3b     |
| <b>MA392</b> | 16182C 16183C 16189 16223 16278 16290 16294 16309 16390                        | 73 146 152 195                  | L2a1    |
| <b>MA393</b> | 16182C 16183C 16189 16217 16247 16261 16291 16519                              | 73 146                          | B4a1a1a |
| <b>MA394</b> | 16172 16183C 16189 16213 16223 16245 16320 16519                               | 73 150 152 195                  | L3e2b3  |
| <b>MA395</b> | 16182C 16183C 16189 16223 16278 16290 16294 16390                              | 73 146 195                      | L2a1    |
| <b>MA396</b> | 16093 16223 16278 16362 16519                                                  | 73 263                          | L3b     |
| <b>MA397</b> | 16129 16148 16168 16172 16187 16188G 16189 16223 16230 16278 16293 16311 16320 | 93 95C 185 189 236 247 263      | L0a1'4  |
| <b>MA398</b> | 16093 16223 16278 16362 16519                                                  | 73 263                          | L3b     |
| <b>MA399</b> | 16182C 16183C 16189 16223 16278 16290 16294 16309 16390 16519                  | 73 146 152 195                  | L2a1    |

---

|                   |              |                                                                    |                                       |         |
|-------------------|--------------|--------------------------------------------------------------------|---------------------------------------|---------|
|                   | <b>MA400</b> | 16172 16223 16263 16311 16519                                      | 73 152 195 204 263                    | M23     |
|                   | <b>MA403</b> | 16172 16183C 16189 16213 16223 16320 16519                         | 73 150 152 195                        | L3e2b3  |
|                   | <b>MA405</b> | 16129 16144 16148 16192 16223 16241 16265C 16274 16311 16343 16362 | 73 89 146 238 263                     | Q1      |
|                   | <b>MA406</b> | 16093 16223 16355                                                  | 73 150 152 235 263                    | L3k     |
|                   | <b>MA409</b> | 16148 16172 16187 16188G 16189 16223 16230 16311 16320 16519       | 64 93 152 189 204 207 236 247 263     | L0a2    |
|                   | <b>MA410</b> | 16185 16223 16327 16519                                            | 73 150 189 200 263                    | L3e1a   |
|                   | <b>MA411</b> | 16220C 16265 16298 16362                                           | 73 150 152 200 249d 263               | F3b     |
|                   | <b>MA412</b> | 16223 16263 16311 16519                                            | 73 152 195 204 263                    | M23     |
|                   | <b>MA414</b> | 16182C 16183C 16189 16217 16247 16261 16291 16519                  | 73 146                                | B4a1a1a |
|                   | <b>MA415</b> | 16189 16192 16223 16256 16278 16294 16309 16344 16390 16519        | 73 146 152 195                        | L2a1    |
|                   | <b>MA436</b> | 16220C 16265 16298 16362                                           | 73 150 152 249d 263                   | F3b     |
| <b>Antalaotra</b> | <b>MA407</b> | 16223 16263 16311 16519                                            | 73 152 195 204 263                    | M23     |
|                   | <b>MA416</b> | 16223 16265T 16519                                                 | 73 150 152 195 263                    | L3e3    |
|                   | <b>MA417</b> | 16093 16223 16278 16362 16399 16519                                | 73 263                                | L3b     |
|                   | <b>MA418</b> | 16182C 16183C 16189 16217 16247 16261 16519                        | 73 146 263                            | B4a1a1a |
|                   | <b>MA420</b> | 16182C 16183C 16189 16217 16247 16261 16519                        | 73 146                                | B4a1a1a |
|                   | <b>MA421</b> | 16223 16265T 16519                                                 | 73 150 195 263                        | L3e3    |
|                   | <b>MA422</b> | 16093 16223 16278 16362 16519                                      | 73 263                                | L3b     |
|                   | <b>MA423</b> | 16182C 16183C 16189 16217 16247 16261 16519                        | 73 146                                | B4a1a1a |
|                   | <b>MA424</b> | 16172 16182C 16189 16213 16223 16245 16320 16519                   | 73 150 152 195                        | L3e2b3  |
|                   | <b>MA425</b> | 16182C 16183C 16189 16223 16278 16290 16294 16309 16390            | 73 146 152 195                        | L2a1    |
|                   | <b>MA426</b> | 16093 16223 16295 16362 16519                                      | 73 146 199 263                        | M7c3c   |
|                   | <b>MA427</b> | 16182C 16183C 16189 16217 16247 16261 16519                        | 73 146                                | B4a1a1a |
|                   | <b>MA428</b> | 16086 16148 16189 16223 16259 16278 16319 16399 16526              | 73 150 200                            | M32c    |
|                   | <b>MA429</b> | 16182C 16183C 16189 16223 16278 16290 16294 16309 16390            | 73 146 152 195                        | L2a1    |
|                   | <b>MA430</b> | 16148 16172 16187 16188G 16189 16223 16230 16311 16320 16519       | 64 93 150 152 189 204 207 236 247 263 | L0a2    |
|                   | <b>MA432</b> | 16093 16223 16278 16362                                            | 73 263                                | L3b     |
|                   | <b>MA435</b> | 16182C 16183C 16189 16217 16247 16261 16519                        | 73 146                                | B4a1a1a |
|                   | <b>MA438</b> | 16172 16183C 16189 16213 16223 16245 16320 16519                   | 73 150 152 195                        | L3e2b3  |

---

|              |                                                              |                                       |         |
|--------------|--------------------------------------------------------------|---------------------------------------|---------|
| <b>MA439</b> | 16182C 16183C 16189 16217 16247 16261 16519                  | 73 146 199                            | B4a1a1a |
| <b>MA440</b> | 16182C 16183C 16189 16217 16261 16519                        | 73 146                                | B4a1a1a |
| <b>MA441</b> | 16223 16263 16311 16519                                      | 73 151 152 195 204 263                | M23     |
| <b>MA442</b> | 16148 16172 16187 16188G 16189 16223 16230 16311 16320 16519 | 64 93 150 152 189 204 207 236 247 263 | L0a2    |
| <b>MA443</b> | 16182C 16183C 16189 16217 16247 16261 16519                  | 73 146                                | B4a1a1a |
| <b>MA445</b> | 16213 16220C 16265 16298 16362                               | 73 150 152 249d 263                   | F3b     |
| <b>MA447</b> | 16093 16223 16278 16362 16519                                | 73 263                                | L3b     |
| <b>MA448</b> | 16086 16148 16223 16259 16278 16319 16399 16526              | 73 150 200 263                        | M32c    |
| <b>MA449</b> | 16223 16295 16362 16359                                      | 73 146 199 263                        | M7c3c   |
| <b>MA450</b> | 16223 16263 16311 16359                                      | 73 152 195 204 263                    | M23     |
| <b>MA451</b> | 16221 16223 16291 16362 16390 16359                          | 73 263                                | E1a     |
| <b>MA453</b> | 16223 16263 16311 16519                                      | 73 152 195 204 263                    | M23     |
| <b>MA455</b> | 16220C 16265 16298 16362                                     | 73 150 152 249d 263                   | F3b     |
| <b>MA456</b> | 16086 16148 16223 16259 16278 16319 16399 16526              | 73 150 200 263                        | M32c    |
| <b>MA457</b> | 16213 16220C 16265 16298 16362                               | 73 150 152 249d 263                   | F3b     |
| <b>MA459</b> | 16220C 16265 16298 16362                                     | 73 150 152 249d 263                   | F3b     |
| <b>MA461</b> | 16265T 16292 16519                                           | 73 150 195 263                        | L3e3    |
| <b>MA462</b> | 16223 16263 16311 16519                                      | 73 152 195 204 263                    | M23     |
| <b>MA464</b> | 16093 16223 16278 16291 16362 16519                          | 73 263                                | L3b     |
| <b>MA465</b> | 16220C 16265 16298 16362                                     | 73 150 152 249d 263                   | F3b     |
| <b>MA466</b> | 16182C 16183C 16189 16217 16247 16261 16519                  | 73 146                                | B4a1a1a |
| <b>MA469</b> | 16093 16223 16278 16362 16519                                | 73 263                                | L3b     |

---

**Table S7.** Database used for HVI analysis

| <b>Geographic Group</b>          | <b>Population</b>        | <b>n</b> | <b>References</b>     |
|----------------------------------|--------------------------|----------|-----------------------|
| <b>West Indian Ocean islands</b> | Highlands                | 52       | [28] [25,27]          |
| <b>West Indian Ocean islands</b> | Antanosy                 | 54       | [25]                  |
| <b>West Indian Ocean islands</b> | Antandroy                | 59       | [25]                  |
| <b>West Indian Ocean islands</b> | Mikea                    | 127      | [27]                  |
| <b>West Indian Ocean islands</b> | Vezo Northern Tuléar     | 52       | [27]                  |
| <b>West Indian Ocean islands</b> | Vezo Southern Tuléar     | 49       | [27]                  |
| <b>Africa CWS</b>                | Angola Nyaneka           | 147      | [2]                   |
| <b>Africa CWS</b>                | Angola Ovimbudu          | 98       | [2]                   |
| <b>Africa CWS</b>                | Fon Benin                | 171      | [7,68]                |
| <b>Africa CWS</b>                | Cabinda Angola           | 110      | [1]                   |
| <b>Africa CWS</b>                | Cabo Verde               | 292      | [69]                  |
| <b>Africa CWS</b>                | Cameroon Ngumba          | 88       | [70]                  |
| <b>Africa CWS</b>                | Cameroon Pygmies Baka    | 87       | [70]                  |
| <b>Africa CWS</b>                | Cameroon Pygmies Bakoka  | 88       | [70]                  |
| <b>Africa CWS</b>                | Gabon Fang               | 66       | [70]                  |
| <b>Africa CWS</b>                | Gabon Mitsogo            | 64       | [70]                  |
| <b>Africa CWS</b>                | Gabon Nzebi              | 63       | [70]                  |
| <b>Africa CWS</b>                | Guinea Bissau            | 372      | [71]                  |
| <b>Africa CWS</b>                | Ivory coast Ahizi        | 129      | [7]                   |
| <b>Africa CWS</b>                | Ivory coast Yacouba      | 61       | [7]                   |
| <b>Africa CWS</b>                | Mali Malinke             | 60       | [72]                  |
| <b>Africa CWS</b>                | Mozambique               | 416      | [73] [74]             |
| <b>Africa CWS</b>                | Rwanda Hutu              | 106      | [75] [68]             |
| <b>Africa CWS</b>                | Sao Tome                 | 103      | [76]                  |
| <b>Africa CWS</b>                | Senegal Mandenka         | 119      | [77]                  |
| <b>Africa CWS</b>                | Senegal Wolof            | 91       | [78]                  |
| <b>Africa CWS</b>                | South Africa Kung        | 59       | [79]                  |
| <b>Africa CWS</b>                | Zimbabwe                 | 58       | [75]                  |
| <b>Northern Africa</b>           | Guanche Canaries island  | 71       | [80]                  |
| <b>Northern Africa</b>           | Egypt Arabs              | 102      | (Coudray unpublished) |
| <b>Northern Africa</b>           | Egypt Coptes             | 100      | (Coudray unpublished) |
| <b>Northern Africa</b>           | Maures Mauritania        | 64       | [81]                  |
| <b>Northern Africa</b>           | Morocco Berbers          | 181      | [78] [82]             |
| <b>Northern Africa</b>           | Tunisia                  | 47       | [83]                  |
| <b>Northern Africa</b>           | Algeria                  | 47       | [84]                  |
| <b>Northern Africa</b>           | Sahawari                 | 56       | [83]                  |
| <b>Northern Africa</b>           | Samaritans               | 124      | [85]                  |
| <b>Northern Africa</b>           | Tunisia Various          | 102      | [86] [83]             |
| <b>Northern Africa</b>           | Morocco Berbers Bourhiah | 70       | [87]                  |
| <b>Northern Africa</b>           | Morocco Berbers Figuig   | 94       | [87]                  |

---

|                        |                          |     |                                            |
|------------------------|--------------------------|-----|--------------------------------------------|
| <b>Northern Africa</b> | Egypt Berbers Siwa       | 78  | [87]                                       |
| <b>Northern Africa</b> | Libya Tuaregs            | 129 | [85]                                       |
| <b>Eastern Africa</b>  | Kenya Swahili            | 200 | [88]                                       |
| <b>Eastern Africa</b>  | Tanzania Hadza           | 79  | [51]                                       |
| <b>Eastern Africa</b>  | Tanzania Sandawe         | 82  | [51]                                       |
| <b>Eastern Africa</b>  | Ethiopia Amharic Various | 270 | [89]                                       |
| <b>Eastern Africa</b>  | Sudan Nubia              | 161 | [89] [90]                                  |
| <b>Eastern Africa</b>  | Ethiopia various         | 116 | [91]                                       |
| <b>Middle East</b>     | Soqotra                  | 65  | [31]                                       |
| <b>Middle East</b>     | Iran                     | 146 | [92,93]                                    |
| <b>Middle East</b>     | Syria                    | 49  | [94]                                       |
| <b>Middle East</b>     | Yemen                    | 115 | [89]                                       |
| <b>Middle East</b>     | Israel Druzes            | 45  | [95]                                       |
| <b>Middle East</b>     | Kurds                    | 78  | [92,96]                                    |
| <b>Middle East</b>     | Cyprus Greek             | 91  | [97]                                       |
| <b>Middle East</b>     | Irak                     | 52  | [36]                                       |
| <b>Middle East</b>     | Iranian                  | 731 | [92,98] (Balloux unpublished)              |
| <b>Middle East</b>     | Dubai                    | 249 | [99]                                       |
| <b>Middle East</b>     | Israel Druzes            | 311 | [29]                                       |
| <b>Middle East</b>     | Turkey various           | 234 | [92,100,101]                               |
| <b>Middle East</b>     | Jordan                   | 99  | [102]                                      |
| <b>Middle East</b>     | Iran Kurds               | 25  | [103]                                      |
| <b>Middle East</b>     | Iran Persians            | 82  | [103]                                      |
| <b>Middle East</b>     | Saudi Arabia             | 553 | [104]                                      |
| <b>Southern Asia</b>   | Bangladesh               | 30  | [105]                                      |
| <b>Southern Asia</b>   | Gujarat                  | 91  | [106]                                      |
| <b>Southern Asia</b>   | India Kamataka           | 201 | [107] [106] [98]                           |
| <b>Southern Asia</b>   | India Kerala             | 230 | [108] [109] [106] [98] [107]               |
| <b>Southern Asia</b>   | Madyah Pradesh           | 82  | [98] [108] [110]                           |
| <b>Southern Asia</b>   | India Maharashtra        | 221 | [98,107,108,111] [110]                     |
| <b>Southern Asia</b>   | India Orissa             | 153 | [112] [98] [108]                           |
| <b>Southern Asia</b>   | Punjab                   | 362 | [108] [107] [113]                          |
| <b>Southern Asia</b>   | Tamils Nadu              | 427 | [108] [107] [109]                          |
| <b>Southern Asia</b>   | India Tripura            | 134 | [108] [107] [112]                          |
| <b>Southern Asia</b>   | Uttard Pradesh           | 232 | [108] [112] [98] [109,114]                 |
| <b>Southern Asia</b>   | Western Bengali          | 285 | [108] [98] [109]                           |
| <b>Southern Asia</b>   | Sri Lanka                | 131 | [115]                                      |
| <b>Southern Asia</b>   | Hindus India             | 72  | [116]                                      |
| <b>Western Europe</b>  | Sicilia                  | 226 | [117] (Rickards <i>et al.</i> unpublished) |
| <b>Western Europe</b>  | Galicia                  | 92  | [118]                                      |
| <b>Western Europe</b>  | Catalan                  | 46  | [83]                                       |
| <b>Western Europe</b>  | Andalusia                | 115 | [119] [84]                                 |
| <b>Western Europe</b>  | Portuguese               | 54  | [120]                                      |
| <b>Western Europe</b>  | Corsica                  | 53  | [121]                                      |
| <b>Western Europe</b>  | France Southern          | 110 | [122]                                      |

---

---

|                          |                                        |     |                                               |
|--------------------------|----------------------------------------|-----|-----------------------------------------------|
| <b>Western Europe</b>    | England                                | 100 | [123]                                         |
| <b>Western Europe</b>    | Greece                                 | 114 | [94,117] (Rickards <i>et al.</i> unpublished) |
| <b>Southeastern Asia</b> | Thailand various                       | 71  | [124]                                         |
| <b>Southeastern Asia</b> | Vietnam                                | 65  | [125]                                         |
| <b>Southeastern Asia</b> | Adonara                                | 73  | [44]                                          |
| <b>Southeastern Asia</b> | Flores                                 | 73  | [44]                                          |
| <b>Southeastern Asia</b> | Banjarmasin                            | 110 | [28,126]                                      |
| <b>Southeastern Asia</b> | Bali                                   | 64  | [126]                                         |
| <b>Southeastern Asia</b> | Sumatra Medan                          | 42  | [127]                                         |
| <b>Southeastern Asia</b> | Sumatra Pekanbaru                      | 54  | [127]                                         |
| <b>Southeastern Asia</b> | Nicobar various                        | 46  | [128]                                         |
| <b>Southeastern Asia</b> | Onges Nicobar                          | 63  | [128]                                         |
| <b>Southeastern Asia</b> | Philippines                            | 144 | [126,129,130]                                 |
| <b>Southeastern Asia</b> | Iban                                   | 83  | [131]                                         |
| <b>Southeastern Asia</b> | Malays Kuala Lumpur                    | 124 | [132]                                         |
| <b>Southeastern Asia</b> | Malays Singapore                       | 205 | [133]                                         |
| <b>Oceania</b>           | New Guinea highlands                   | 71  | [134]                                         |
| <b>Oceania</b>           | Solomon islands                        | 64  | [135]                                         |
| <b>Oceania</b>           | Papouasie New Guinea<br>Province Manus | 144 | [136]                                         |
| <b>Oceania</b>           | New Guinea Gidra                       | 59  | [137]                                         |
| <b>Oceania</b>           | Archipelago Bismark                    | 47  | [138]                                         |
| <b>Oceania</b>           | Vanuatu Nguna                          | 42  | [139]                                         |

---

**Table S8.** Table of population pairwise  $F_{ST}$  values based on Y haplogroup frequencies.

|                                          | <b>Ampnanabaka</b> |                                 | <b>Antalaotra</b> |                                 | <b>Anteony</b> |                                 |
|------------------------------------------|--------------------|---------------------------------|-------------------|---------------------------------|----------------|---------------------------------|
|                                          | $F_{ST}$           | Significativity threshold of 5% | $F_{ST}$          | Significativity threshold of 5% | $F_{ST}$       | Significativity threshold of 5% |
| <b>Ampnanabaka</b>                       | *                  | *                               |                   |                                 |                |                                 |
| <b>Antalaotra</b>                        | 0.31664            | +                               | *                 | *                               |                |                                 |
| <b>Anteony</b>                           | 0.43138            | +                               | 0.16051           | +                               | *              | *                               |
| <b>Antandroy</b>                         | 0.00750            | -                               | 0.26312           | +                               | 0.38024        | +                               |
| <b>Antanosy</b>                          | 0.05669            | +                               | 0.11941           | +                               | 0.26578        | +                               |
| <b>Comoros</b>                           | 0.08978            | +                               | 0.11477           | +                               | 0.22337        | +                               |
| <b>Mikea Mikea-vezo</b>                  | 0.06864            | +                               | 0.16897           | +                               | 0.31891        | +                               |
| <b>Vezo Northern Tulear</b>              | 0.01617            | -                               | 0.30595           | +                               | 0.42315        | +                               |
| <b>Vezo Southern Tulear</b>              | -0.00810           | -                               | 0.24402           | +                               | 0.36632        | +                               |
| <b>Highlands Madagascar</b>              | 0.13919            | +                               | 0.04064           | +                               | 0.21931        | +                               |
| <b>Angola Cabinda</b>                    | 0.02905            | -                               | 0.37818           | +                               | 0.46437        | +                               |
| <b>Angola Nyaneka-Nkhumbi</b>            | 0.04965            | +                               | 0.47172           | +                               | 0.55806        | +                               |
| <b>Angola Ovimbudu</b>                   | 0.04502            | +                               | 0.47291           | +                               | 0.54891        | +                               |
| <b>DRC Mbuti Pygmies</b>                 | 0.19099            | +                               | 0.19990           | +                               | 0.31638        | +                               |
| <b>South Africa !Kung</b>                | 0.21482            | +                               | 0.23373           | +                               | 0.32574        | +                               |
| <b>South Africa !Khwe</b>                | 0.11796            | +                               | 0.24889           | +                               | 0.33064        | +                               |
| <b>Rwanda Hutu</b>                       | 0.04186            | +                               | 0.44910           | +                               | 0.53877        | +                               |
| <b>Rwanda Tutsi</b>                      | 0.03599            | +                               | 0.41178           | +                               | 0.49665        | +                               |
| <b>Mozambique various</b>                | 0.51330            | +                               | 0.34020           | +                               | 0.43975        | +                               |
| <b>Zambia Eastern</b>                    | 0.07148            | +                               | 0.49647           | +                               | 0.59311        | +                               |
| <b>Western Zambia – Western Bantus</b>   | 0.06430            | +                               | 0.54129           | +                               | 0.61501        | +                               |
| <b>Western Zambia – Eastern Bantus</b>   | 0.05373            | +                               | 0.54481           | +                               | 0.60938        | +                               |
| <b>Equatorial Guinea various</b>         | 0.05077            | +                               | 0.27790           | +                               | 0.35313        | +                               |
| <b>Benin</b>                             | 0.08655            | +                               | 0.52084           | +                               | 0.61642        | +                               |
| <b>Burkina Faso Fulbe</b>                | 0.08617            | +                               | 0.52545           | +                               | 0.61028        | +                               |
| <b>Burkina Faso Mossi</b>                | 0.06706            | +                               | 0.51434           | +                               | 0.60214        | +                               |
| <b>Burkina Faso Rimaibe</b>              | 0.09962            | +                               | 0.28083           | +                               | 0.39300        | +                               |
| <b>Cameroon Bakaka</b>                   | 0.23876            | +                               | 0.66630           | +                               | 0.75939        | +                               |
| <b>Cameroon Bamileke</b>                 | 0.13920            | +                               | 0.60423           | +                               | 0.69322        | +                               |
| <b>Cameroon Daba</b>                     | 0.28776            | +                               | 0.19870           | +                               | 0.31379        | +                               |
| <b>Cameroon Ewondo</b>                   | 0.05113            | +                               | 0.48739           | +                               | 0.57060        | +                               |
| <b>Cameroon Fali</b>                     | 0.09440            | +                               | 0.27346           | +                               | 0.35516        | +                               |
| <b>Cameroon Fulbe</b>                    | 0.47428            | +                               | 0.28597           | +                               | 0.38403        | +                               |
| <b>Cameroon various Adamawa</b>          | 0.34336            | +                               | 0.27556           | +                               | 0.36619        | +                               |
| <b>Cameroon various Chadic</b>           | 0.46034            | +                               | 0.32345           | +                               | 0.41704        | +                               |
| <b>Cameroon Nilo-Saharan</b>             | 0.24091            | +                               | 0.21405           | +                               | 0.31570        | +                               |
| <b>Cameroon Tali</b>                     | 0.06456            | +                               | 0.36200           | +                               | 0.44236        | +                               |
| <b>Cameroon Uldeme</b>                   | 0.79597            | +                               | 0.62187           | +                               | 0.72117        | +                               |
| <b>African central republic Lissongo</b> | 0.05395            | +                               | 0.46659           | +                               | 0.54180        | +                               |
| <b>Cabo Verde - Northern</b>             | 0.29012            | +                               | 0.12558           | +                               | 0.20651        | +                               |



|                              |         |   |         |   |         |   |
|------------------------------|---------|---|---------|---|---------|---|
| <b>Cabo Verde - Southern</b> | 0.23313 | + | 0.10514 | + | 0.17929 | + |
| <b>Benin Fon</b>             | 0.13144 | + | 0.58629 | + | 0.67810 | + |
| <b>Cameroon Bantus</b>       | 0.04331 | + | 0.40278 | + | 0.48384 | + |
| <b>Senegal various</b>       | 0.03774 | + | 0.43688 | + | 0.51343 | + |
| <b>Tanzania Datoga</b>       | 0.60676 | + | 0.42811 | + | 0.51671 | + |
| <b>Tanzania Hadzabe</b>      | 0.45534 | + | 0.27686 | + | 0.37314 | + |
| <b>Kenya Bantus</b>          | 0.15430 | + | 0.16585 | + | 0.27665 | + |
| <b>Tanzania Wairak</b>       | 0.17815 | + | 0.21737 | + | 0.28183 | + |
| <b>Kenya</b>                 | 0.19471 | + | 0.22983 | + | 0.31374 | + |
| <b>Karamoja. Uganda</b>      | 0.44809 | + | 0.30825 | + | 0.41177 | + |
| <b>Maasai Kenya nilotic</b>  | 0.22230 | + | 0.16771 | + | 0.26855 | + |
| <b>Ethiopia Juifs</b>        | 0.40942 | + | 0.23052 | + | 0.32333 | + |
| <b>Ethiopia Amhara</b>       | 0.41147 | + | 0.14938 | + | 0.22106 | + |
| <b>Ethiopia Oromo</b>        | 0.49116 | + | 0.29143 | + | 0.37010 | + |
| <b>Ethiopia Omo valley</b>   | 0.38852 | + | 0.19662 | + | 0.28973 | + |
| <b>Somalia</b>               | 0.63607 | + | 0.48336 | + | 0.53339 | + |
| <b>Namibia</b>               | 0.18402 | + | 0.23885 | + | 0.32237 | + |
| <b>Egypt</b>                 | 0.34173 | + | 0.13121 | + | 0.18784 | + |
| <b>Algeria various</b>       | 0.39096 | + | 0.20186 | + | 0.28183 | + |
| <b>Lybia Arabs</b>           | 0.43031 | + | 0.19312 | + | 0.27595 | + |
| <b>Morocco Arabs</b>         | 0.60594 | + | 0.42688 | + | 0.51556 | + |
| <b>Morocco Berbers</b>       | 0.60035 | + | 0.43620 | + | 0.52345 | + |
| <b>Morocco</b>               | 0.45937 | + | 0.32352 | + | 0.39495 | + |
| <b>Tunisia</b>               | 0.43236 | + | 0.21776 | + | 0.28789 | + |
| <b>Pakistan</b>              | 0.31252 | + | 0.11930 | + | 0.22293 | + |
| <b>Naikpod</b>               | 0.40489 | + | 0.16888 | + | 0.29755 | + |
| <b>Andh</b>                  | 0.43974 | + | 0.20162 | + | 0.33258 | + |
| <b>Pardhan</b>               | 0.35015 | + | 0.13551 | + | 0.25636 | + |
| <b>Eastern India</b>         | 0.49195 | + | 0.15278 | + | 0.36686 | + |
| <b>Mahadeokoli</b>           | 0.42581 | + | 0.18809 | + | 0.30773 | + |
| <b>Thakar</b>                | 0.39601 | + | 0.15443 | + | 0.28487 | + |
| <b>Muslim Shia</b>           | 0.34031 | + | 0.12980 | + | 0.23568 | + |
| <b>Muslim Sunni</b>          | 0.38237 | + | 0.17733 | + | 0.29006 | + |
| <b>India - Northern</b>      | 0.39619 | + | 0.17920 | + | 0.29491 | + |
| <b>India – Northeastern</b>  | 0.53624 | + | 0.30591 | + | 0.43662 | + |
| <b>India Eastern</b>         | 0.36464 | + | 0.10510 | + | 0.26464 | + |
| <b>India - Southern</b>      | 0.36052 | + | 0.16020 | + | 0.27869 | + |
| <b>India Central</b>         | 0.51501 | + | 0.25087 | + | 0.40558 | + |
| <b>India Western</b>         | 0.38965 | + | 0.16273 | + | 0.28280 | + |
| <b>Northern Portugal</b>     | 0.47259 | + | 0.25603 | + | 0.36366 | + |
| <b>Southern Portugal</b>     | 0.40566 | + | 0.19940 | + | 0.30601 | + |
| <b>Potuguais Jew</b>         | 0.37331 | + | 0.14482 | + | 0.20813 | + |
| <b>France</b>                | 0.61501 | + | 0.40361 | + | 0.51194 | + |
| <b>Basque</b>                | 0.70540 | + | 0.53092 | + | 0.62689 | + |
| <b>Eastern Andalusia</b>     | 0.56320 | + | 0.36623 | + | 0.46870 | + |

|                                       |         |   |         |   |         |   |
|---------------------------------------|---------|---|---------|---|---------|---|
| <b>Galicia</b>                        | 0.47320 | + | 0.27454 | + | 0.37517 | + |
| <b>North-western Castille</b>         | 0.47906 | + | 0.28512 | + | 0.38460 | + |
| <b>Iranian Arabs</b>                  | 0.41161 | + | 0.17291 | + | 0.30011 | + |
| <b>Israel Druzes Galilea</b>          | 0.31495 | + | 0.11175 | + | 0.20651 | + |
| <b>Palestinian</b>                    | 0.35795 | + | 0.13180 | + | 0.20609 | + |
| <b>Kuwait Bedouins</b>                | 0.62755 | + | 0.36344 | + | 0.42317 | + |
| <b>Socotra various</b>                | 0.67615 | + | 0.37920 | + | 0.45852 | + |
| <b>Saudi Arabia</b>                   | 0.32832 | + | 0.10334 | + | 0.16407 | + |
| <b>Qatar</b>                          | 0.44756 | + | 0.16156 | + | 0.24598 | + |
| <b>UAE</b>                            | 0.31207 | + | 0.09138 | + | 0.15462 | + |
| <b>Oman</b>                           | 0.32688 | + | 0.09330 | + | 0.14189 | + |
| <b>Yemen</b>                          | 0.55627 | + | 0.26304 | + | 0.34006 | + |
| <b>Lebanon</b>                        | 0.30399 | + | 0.10206 | + | 0.17749 | + |
| <b>Jordan</b>                         | 0.36087 | + | 0.13027 | + | 0.21427 | + |
| <b>Irak</b>                           | 0.34062 | + | 0.10419 | + | 0.17676 | + |
| <b>Iran</b>                           | 0.30900 | + | 0.09850 | + | 0.19561 | + |
| <b>Syrians</b>                        | 0.32949 | + | 0.10617 | + | 0.17475 | + |
| <b>Iranians</b>                       | 0.30729 | + | 0.11204 | + | 0.20406 | + |
| <b>Cyprus</b>                         | 0.35103 | + | 0.13438 | + | 0.22146 | + |
| <b>Turkey various</b>                 | 0.36506 | + | 0.13491 | + | 0.24827 | + |
| <b>Turkey Anatolia</b>                | 0.29780 | + | 0.10435 | + | 0.19111 | + |
| <b>Vanuatu-Maewo</b>                  | 0.40438 | + | 0.17320 | + | 0.29166 | + |
| <b>South-western New Guinea Una</b>   | 0.79807 | + | 0.58138 | + | 0.70009 | + |
| <b>PNG Trobriand</b>                  | 0.37876 | + | 0.14090 | + | 0.29352 | + |
| <b>PNG Kapuna</b>                     | 0.54444 | + | 0.32102 | + | 0.43240 | + |
| <b>Cook</b>                           | 0.62744 | + | 0.42289 | + | 0.52956 | + |
| <b>Futuna</b>                         | 0.43829 | + | 0.21717 | + | 0.32559 | + |
| <b>Fidji</b>                          | 0.39384 | + | 0.19448 | + | 0.30165 | + |
| <b>Tuvalu</b>                         | 0.43450 | + | 0.23512 | + | 0.33990 | + |
| <b>Western Samoa</b>                  | 0.49305 | + | 0.27656 | + | 0.38964 | + |
| <b>Nias</b>                           | 0.93541 | + | 0.82276 | + | 0.91999 | + |
| <b>Philippines</b>                    | 0.45563 | + | 0.21794 | + | 0.34959 | + |
| <b>Vietnam</b>                        | 0.41420 | + | 0.12518 | + | 0.30188 | + |
| <b>Bali</b>                           | 0.42772 | + | 0.10718 | + | 0.35497 | + |
| <b>Java</b>                           | 0.41636 | + | 0.06734 | + | 0.30572 | + |
| <b>Borneo</b>                         | 0.38009 | + | 0.12610 | + | 0.28195 | + |
| <b>Nias various</b>                   | 0.78733 | + | 0.52270 | + | 0.73189 | + |
| <b>Mentawai</b>                       | 0.64605 | + | 0.39032 | + | 0.60254 | + |
| <b>Flores</b>                         | 0.37058 | + | 0.19134 | + | 0.30136 | + |
| <b>Sulawesi</b>                       | 0.33712 | + | 0.07163 | + | 0.24091 | + |
| <b>Sumba</b>                          | 0.44165 | + | 0.27408 | + | 0.37796 | + |
| <b>Lembata</b>                        | 0.43049 | + | 0.23261 | + | 0.33676 | + |
| <b>Adonara various (Austronesian)</b> | 0.73845 | + | 0.55727 | + | 0.65824 | + |
| <b>Flores various (Austronesian)</b>  | 0.50397 | + | 0.29944 | + | 0.40306 | + |
| <b>Solor various (Austronesian)</b>   | 0.45657 | + | 0.22868 | + | 0.33974 | + |

---

|                     |         |   |         |   |         |   |
|---------------------|---------|---|---------|---|---------|---|
| <b>Sumatra</b>      | 0.35285 | + | 0.09115 | + | 0.25245 | + |
| <b>Java various</b> | 0.40449 | + | 0.06689 | + | 0.29906 | + |
| <b>Negritos</b>     | 0.36292 | + | 0.16059 | + | 0.30252 | + |
| <b>Non Negritos</b> | 0.43808 | + | 0.21848 | + | 0.41114 | + |
| <b>Malay</b>        | 0.42278 | + | 0.09586 | + | 0.28927 | + |

---

**Table S9.** Shared haplotypes between the Ampanabaka, other Malagasy populations and the Comoros, using 17 Y-STR markers

|               | Ampanabaka | Antaisak<br>a | Antandroy | Antanos<br>y | Comoros    | Andrian<br>a | Merin<br>a | Tsimahafots<br>y | Mikea     | Vezo -<br>Northern | Vezo -<br>Southern |
|---------------|------------|---------------|-----------|--------------|------------|--------------|------------|------------------|-----------|--------------------|--------------------|
| <b>N ind.</b> | <b>46</b>  | <b>8</b>      | <b>46</b> | <b>47</b>    | <b>293</b> | <b>21</b>    | <b>9</b>   | <b>5</b>         | <b>59</b> | <b>16</b>          | <b>31</b>          |
| <b>N hap.</b> | <b>36</b>  | <b>7</b>      | <b>36</b> | <b>47</b>    | <b>250</b> | <b>13</b>    | <b>8</b>   | <b>3</b>         | <b>44</b> | <b>12</b>          | <b>28</b>          |
| H1            | 6          | 0             | 0         | 0            | 0          | 0            | 0          | 0                | 0         | 0                  | 0                  |
| H2            | 5          | 0             | 0         | 0            | 0          | 0            | 0          | 0                | 0         | 0                  | 0                  |
| H3            | 1          | 0             | 0         | 0            | 0          | 0            | 0          | 0                | 0         | 0                  | 0                  |
| H4            | 1          | 0             | 0         | 0            | 0          | 0            | 0          | 0                | 0         | 0                  | 0                  |
| H5            | 2          | 0             | 0         | 0            | 0          | 0            | 0          | 0                | 0         | 0                  | 0                  |
| H6            | 1          | 0             | 0         | 0            | 0          | 0            | 0          | 0                | 0         | 0                  | 0                  |
| H7            | 1          | 0             | 0         | 0            | 0          | 0            | 0          | 0                | 0         | 0                  | 0                  |
| H8            | 1          | 0             | 0         | 0            | 0          | 0            | 0          | 0                | 0         | 0                  | 0                  |
| H9            | 1          | 0             | 0         | 0            | 0          | 0            | 0          | 0                | 0         | 0                  | 0                  |
| H10           | 1          | 0             | 0         | 0            | 0          | 0            | 0          | 0                | 0         | 0                  | 0                  |
| H11           | 1          | 0             | 0         | 0            | 0          | 0            | 0          | 0                | 0         | 0                  | 0                  |
| H12           | 1          | 0             | 0         | 0            | 0          | 0            | 0          | 0                | 0         | 0                  | 0                  |
| H13           | 1          | 0             | 0         | 0            | 0          | 0            | 0          | 0                | 0         | 0                  | 0                  |
| H14           | 1          | 0             | 0         | 0            | 0          | 0            | 0          | 0                | 0         | 0                  | 0                  |
| H15           | 1          | 0             | 0         | 0            | 0          | 0            | 0          | 0                | 0         | 0                  | 0                  |
| H16           | 1          | 0             | 0         | 0            | 0          | 0            | 0          | 0                | 0         | 0                  | 0                  |
| H17           | 1          | 0             | 0         | 0            | 0          | 0            | 0          | 0                | 0         | 0                  | 0                  |
| H18           | 1          | 0             | 0         | 0            | 0          | 0            | 0          | 0                | 0         | 0                  | 0                  |
| H19           | 1          | 0             | 0         | 0            | 0          | 0            | 0          | 0                | 0         | 0                  | 0                  |
| H20           | 1          | 0             | 0         | 0            | 0          | 0            | 0          | 0                | 0         | 0                  | 0                  |
| H21           | 1          | 0             | 0         | 0            | 0          | 0            | 0          | 0                | 0         | 0                  | 0                  |
| H22           | 1          | 0             | 0         | 0            | 0          | 0            | 0          | 0                | 0         | 0                  | 0                  |
| H23           | 1          | 0             | 0         | 0            | 0          | 0            | 0          | 0                | 0         | 0                  | 0                  |
| H24           | 1          | 0             | 0         | 0            | 0          | 0            | 0          | 0                | 0         | 0                  | 0                  |
| H25           | 1          | 0             | 0         | 0            | 0          | 0            | 0          | 0                | 0         | 0                  | 0                  |
| H26           | 1          | 0             | 0         | 0            | 0          | 0            | 0          | 0                | 0         | 0                  | 0                  |
| H27           | 1          | 0             | 0         | 0            | 0          | 0            | 0          | 0                | 0         | 0                  | 0                  |
| H28           | 1          | 0             | 0         | 0            | 0          | 0            | 0          | 0                | 0         | 0                  | 0                  |
| H29           | 1          | 0             | 0         | 0            | 0          | 0            | 0          | 0                | 0         | 0                  | 0                  |
| H30           | 1          | 0             | 1         | 0            | 0          | 0            | 0          | 0                | 0         | 0                  | 0                  |
| H31           | 1          | 0             | 0         | 0            | 0          | 0            | 0          | 0                | 0         | 0                  | 0                  |
| H32           | 1          | 0             | 0         | 1            | 0          | 0            | 0          | 0                | 0         | 0                  | 0                  |
| H33           | 1          | 0             | 0         | 0            | 0          | 0            | 0          | 0                | 0         | 0                  | 0                  |
| H34           | 1          | 0             | 0         | 0            | 0          | 0            | 0          | 0                | 0         | 0                  | 0                  |
| H35           | 1          | 0             | 0         | 0            | 0          | 0            | 0          | 0                | 0         | 0                  | 0                  |
| H36           | 1          | 0             | 0         | 0            | 0          | 0            | 0          | 0                | 0         | 0                  | 0                  |

**Table S10.** Shared haplotypes between the Anteony, other Malagasy populations and the Comoros, using 17 Y-STR markers

|               | Anteony   | Antaisaka | Antandroy | Antanosy  | Comoros    | Andriana  | Merina   | Tsimahafotsy | Mikea     | Vezo - Northern | Vezo - Southern |
|---------------|-----------|-----------|-----------|-----------|------------|-----------|----------|--------------|-----------|-----------------|-----------------|
| <b>N ind.</b> | <b>40</b> | <b>8</b>  | <b>46</b> | <b>47</b> | <b>293</b> | <b>21</b> | <b>9</b> | <b>5</b>     | <b>59</b> | <b>16</b>       | <b>31</b>       |
| <b>N hap.</b> | <b>21</b> | <b>7</b>  | <b>36</b> | <b>47</b> | <b>250</b> | <b>13</b> | <b>8</b> | <b>3</b>     | <b>44</b> | <b>12</b>       | <b>28</b>       |
| <b>H1</b>     | 8         | 0         | 0         | 0         | 0          | 0         | 0        | 0            | 0         | 0               | 0               |
| <b>H2</b>     | 8         | 0         | 0         | 0         | 0          | 0         | 0        | 0            | 0         | 0               | 0               |
| <b>H3</b>     | 5         | 0         | 0         | 0         | 0          | 0         | 0        | 0            | 0         | 0               | 0               |
| <b>H4</b>     | 1         | 0         | 0         | 0         | 0          | 0         | 0        | 0            | 0         | 0               | 0               |
| <b>H5</b>     | 1         | 0         | 0         | 0         | 0          | 0         | 0        | 0            | 0         | 0               | 0               |
| <b>H6</b>     | 1         | 0         | 0         | 0         | 0          | 0         | 0        | 0            | 0         | 0               | 0               |
| <b>H7</b>     | 2         | 0         | 0         | 0         | 0          | 0         | 0        | 0            | 0         | 0               | 0               |
| <b>H8</b>     | 1         | 0         | 0         | 0         | 0          | 0         | 0        | 0            | 0         | 0               | 0               |
| <b>H9</b>     | 1         | 0         | 0         | 0         | 0          | 0         | 0        | 0            | 0         | 0               | 0               |
| <b>H10</b>    | 1         | 0         | 0         | 0         | 0          | 0         | 0        | 0            | 0         | 0               | 0               |
| <b>H11</b>    | 1         | 0         | 0         | 0         | 0          | 0         | 0        | 0            | 0         | 0               | 0               |
| <b>H12</b>    | 1         | 0         | 0         | 0         | 0          | 0         | 0        | 0            | 0         | 0               | 0               |
| <b>H13</b>    | 1         | 0         | 0         | 0         | 0          | 0         | 0        | 0            | 0         | 0               | 0               |
| <b>H14</b>    | 1         | 0         | 0         | 0         | 0          | 0         | 0        | 0            | 0         | 0               | 0               |
| <b>H15</b>    | 1         | 0         | 0         | 0         | 0          | 0         | 0        | 0            | 0         | 0               | 0               |
| <b>H16</b>    | 1         | 0         | 0         | 0         | 0          | 0         | 0        | 0            | 0         | 0               | 0               |
| <b>H17</b>    | 1         | 0         | 0         | 0         | 0          | 0         | 0        | 0            | 0         | 0               | 0               |
| <b>H18</b>    | 1         | 0         | 0         | 0         | 0          | 0         | 0        | 0            | 0         | 0               | 0               |
| <b>H19</b>    | 1         | 0         | 0         | 0         | 0          | 0         | 0        | 0            | 0         | 0               | 0               |
| <b>H20</b>    | 1         | 0         | 0         | 0         | 0          | 0         | 0        | 0            | 0         | 0               | 0               |
| <b>H21</b>    | 1         | 0         | 0         | 0         | 0          | 0         | 0        | 0            | 0         | 0               | 0               |

**Table S11.** Shared haplotypes between the Antalaotra, other Malagasy populations and the Comoros, using 17 Y-STR markers.

|               | Antalaotra | Antaisaka | Antandroy | Antanosy  | Comoros    | Andriana  | Merina   | Tsimahafotsy | Mikea     | Vezo - Northern | Vezo - Southern |
|---------------|------------|-----------|-----------|-----------|------------|-----------|----------|--------------|-----------|-----------------|-----------------|
| <b>N ind.</b> | <b>43</b>  | <b>8</b>  | <b>46</b> | <b>47</b> | <b>293</b> | <b>21</b> | <b>9</b> | <b>5</b>     | <b>59</b> | <b>16</b>       | <b>31</b>       |
| <b>N hap.</b> | <b>35</b>  | <b>7</b>  | <b>36</b> | <b>47</b> | <b>250</b> | <b>13</b> | <b>8</b> | <b>3</b>     | <b>44</b> | <b>12</b>       | <b>28</b>       |
| <b>H1</b>     | 4          | 0         | 0         | 0         | 0          | 0         | 0        | 0            | 0         | 0               | 0               |
| <b>H2</b>     | 1          | 0         | 0         | 0         | 0          | 0         | 0        | 0            | 0         | 0               | 0               |
| <b>H3</b>     | 1          | 0         | 0         | 0         | 0          | 0         | 0        | 0            | 0         | 0               | 0               |
| <b>H4</b>     | 1          | 0         | 0         | 0         | 0          | 0         | 0        | 0            | 0         | 0               | 0               |
| <b>H5</b>     | 3          | 0         | 0         | 0         | 0          | 0         | 0        | 0            | 0         | 0               | 0               |
| <b>H6</b>     | 1          | 0         | 0         | 0         | 0          | 0         | 0        | 0            | 0         | 0               | 0               |
| <b>H7</b>     | 2          | 0         | 0         | 0         | 0          | 0         | 0        | 0            | 0         | 0               | 0               |
| <b>H8</b>     | 2          | 0         | 0         | 0         | 0          | 0         | 0        | 0            | 0         | 0               | 0               |
| <b>H9</b>     | 1          | 0         | 0         | 0         | 0          | 0         | 0        | 0            | 0         | 0               | 0               |
| <b>H10</b>    | 2          | 0         | 0         | 0         | 0          | 0         | 0        | 0            | 0         | 0               | 0               |
| <b>H11</b>    | 1          | 0         | 0         | 0         | 0          | 0         | 0        | 0            | 0         | 0               | 0               |
| <b>H12</b>    | 1          | 0         | 0         | 0         | 0          | 0         | 0        | 0            | 0         | 0               | 0               |
| <b>H13</b>    | 1          | 0         | 0         | 0         | 0          | 0         | 0        | 0            | 0         | 0               | 0               |
| <b>H14</b>    | 1          | 0         | 0         | 0         | 0          | 0         | 0        | 0            | 0         | 0               | 0               |
| <b>H15</b>    | 1          | 0         | 0         | 0         | 0          | 0         | 0        | 0            | 0         | 0               | 0               |
| <b>H16</b>    | 1          | 0         | 0         | 0         | 0          | 0         | 0        | 0            | 0         | 0               | 0               |
| <b>H17</b>    | 1          | 0         | 0         | 0         | 0          | 0         | 0        | 0            | 0         | 0               | 0               |
| <b>H18</b>    | 1          | 0         | 0         | 0         | 0          | 0         | 0        | 0            | 0         | 0               | 0               |
| <b>H19</b>    | 1          | 0         | 0         | 0         | 0          | 0         | 0        | 0            | 0         | 0               | 0               |
| <b>H20</b>    | 1          | 0         | 0         | 0         | 0          | 0         | 0        | 0            | 0         | 0               | 0               |
| <b>H21</b>    | 1          | 0         | 0         | 0         | 0          | 0         | 0        | 0            | 0         | 0               | 0               |
| <b>H22</b>    | 1          | 0         | 0         | 0         | 0          | 0         | 0        | 0            | 0         | 0               | 0               |
| <b>H23</b>    | 1          | 0         | 0         | 0         | 0          | 0         | 0        | 0            | 0         | 0               | 0               |
| <b>H24</b>    | 1          | 0         | 0         | 0         | 0          | 0         | 0        | 0            | 0         | 0               | 0               |

---

|            |   |   |   |   |   |   |   |   |   |   |   |   |
|------------|---|---|---|---|---|---|---|---|---|---|---|---|
| <b>H25</b> | 1 | 0 | 0 | 0 | 0 | 0 | 0 | 0 | 0 | 0 | 0 | 0 |
| <b>H26</b> | 1 | 0 | 0 | 0 | 0 | 0 | 0 | 0 | 0 | 0 | 0 | 0 |
| <b>H27</b> | 1 | 0 | 0 | 0 | 0 | 0 | 0 | 0 | 0 | 0 | 0 | 0 |
| <b>H28</b> | 1 | 0 | 0 | 0 | 0 | 0 | 0 | 0 | 0 | 0 | 0 | 0 |
| <b>H29</b> | 1 | 0 | 0 | 0 | 0 | 0 | 0 | 0 | 0 | 0 | 0 | 0 |
| <b>H30</b> | 1 | 0 | 0 | 0 | 0 | 0 | 0 | 0 | 0 | 0 | 0 | 0 |
| <b>H31</b> | 1 | 0 | 0 | 0 | 0 | 0 | 0 | 0 | 0 | 0 | 0 | 0 |
| <b>H32</b> | 1 | 0 | 0 | 0 | 0 | 0 | 0 | 0 | 0 | 0 | 0 | 0 |
| <b>H33</b> | 1 | 0 | 0 | 0 | 0 | 0 | 0 | 0 | 0 | 0 | 0 | 0 |
| <b>H34</b> | 1 | 0 | 0 | 0 | 0 | 0 | 0 | 0 | 0 | 0 | 0 | 0 |
| <b>H35</b> | 1 | 0 | 0 | 0 | 0 | 0 | 0 | 0 | 0 | 0 | 0 | 0 |

---

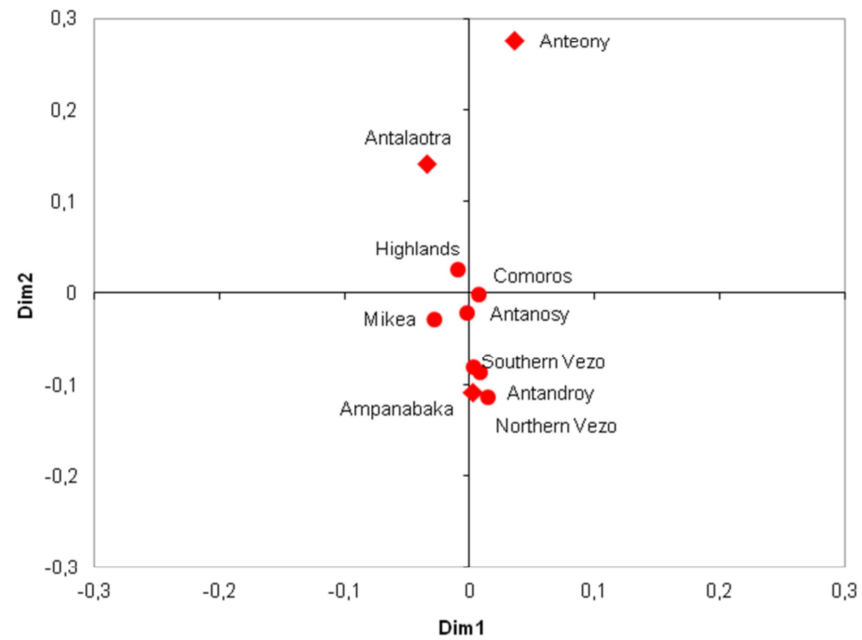

**Figure S1.** MDS plot of  $F_{ST}$  between Malagasy populations and the Comoros using NRY haplogroup frequencies (Kruskal stress: 0.172).



**Table S12.** Shared haplotypes between the Ampanabaka and the database using seven Y-STR markers

|                                | Number of individuals | Number of haplotypes | Hap01 | Hap02 | Hap03 | Hap04 | Hap05 | Hap06 | Hap07 | Hap08 | Hap09 | Hap10 | Hap11 | Hap12 | Hap13 | Hap14 | Hap15 | Hap16 | Hap17 | Hap18 | Hap19 | Hap20 | Hap21 | Hap22 | Hap23 | Hap24 |
|--------------------------------|-----------------------|----------------------|-------|-------|-------|-------|-------|-------|-------|-------|-------|-------|-------|-------|-------|-------|-------|-------|-------|-------|-------|-------|-------|-------|-------|-------|
|                                |                       |                      | E1b1a | E1b1a | O1a2  | E1b1a | J2b   | E1b1a | E1b1a | O1a2  | E1b1a | E1b1a | E1b1a | E1b1a | O1a2  | O1a2  | B2    | E1b1a | E1b1a | O1a2  | O1a2  | E1b1a | E2b   | E1b1a | B2    | E1b1b |
|                                |                       |                      |       |       |       |       |       |       |       |       |       |       |       |       |       |       |       |       |       |       |       |       |       |       |       |       |
| Ethiopia Omo valley            | 67                    | 36                   | 0     | 0     | 0     | 0     | 1     | 0     | 0     | 0     | 0     | 0     | 0     | 0     | 0     | 0     | 0     | 0     | 0     | 0     | 0     | 0     | 0     | 0     | 0     | 0     |
| Kenya Massai                   | 55                    | 40                   | 0     | 1     | 0     | 0     | 1     | 0     | 0     | 0     | 0     | 1     | 0     | 0     | 0     | 0     | 0     | 0     | 1     | 0     | 0     | 0     | 0     | 0     | 0     | 0     |
| Equatorial Guinea              | 101                   | 63                   | 1     | 1     | 0     | 0     | 0     | 1     | 0     | 0     | 1     | 1     | 1     | 1     | 0     | 0     | 0     | 0     | 1     | 0     | 0     | 0     | 0     | 0     | 0     | 0     |
| Gabon                          | 828                   | 239                  | 1     | 1     | 0     | 0     | 0     | 1     | 0     | 0     | 1     | 1     | 1     | 1     | 0     | 0     | 1     | 1     | 1     | 0     | 0     | 1     | 1     | 1     | 1     | 0     |
| Benin                          | 78                    | 51                   | 1     | 1     | 0     | 0     | 0     | 1     | 0     | 0     | 1     | 1     | 0     | 1     | 0     | 0     | 0     | 0     | 1     | 0     | 0     | 0     | 0     | 0     | 0     | 0     |
| Ivory coast                    | 90                    | 50                   | 1     | 1     | 0     | 0     | 0     | 0     | 0     | 0     | 1     | 1     | 1     | 0     | 0     | 0     | 0     | 0     | 0     | 0     | 0     | 0     | 1     | 0     | 0     | 0     |
| African central Republic       | 165                   | 74                   | 1     | 1     | 0     | 0     | 0     | 1     | 0     | 0     | 0     | 1     | 1     | 1     | 0     | 0     | 0     | 1     | 1     | 0     | 0     | 0     | 0     | 0     | 0     | 0     |
| Guinea Bissau                  | 161                   | 106                  | 1     | 1     | 0     | 0     | 0     | 1     | 0     | 0     | 1     | 1     | 1     | 1     | 0     | 0     | 0     | 1     | 1     | 0     | 0     | 0     | 0     | 0     | 0     | 0     |
| Burkina Faso                   | 323                   | 142                  | 1     | 1     | 0     | 1     | 0     | 0     | 0     | 0     | 1     | 1     | 1     | 1     | 0     | 0     | 0     | 1     | 1     | 0     | 0     | 0     | 0     | 0     | 0     | 0     |
| Mozambique                     | 154                   | 56                   | 1     | 1     | 0     | 0     | 0     | 1     | 0     | 0     | 1     | 1     | 1     | 0     | 0     | 0     | 1     | 1     | 1     | 0     | 0     | 1     | 1     | 1     | 0     | 0     |
| Angola Nyaneka                 | 75                    | 40                   | 1     | 0     | 0     | 0     | 0     | 1     | 0     | 0     | 1     | 1     | 1     | 0     | 0     | 0     | 1     | 1     | 1     | 0     | 0     | 0     | 0     | 1     | 0     | 0     |
| Angola Ovimbudu                | 96                    | 43                   | 1     | 1     | 0     | 0     | 0     | 1     | 0     | 0     | 0     | 1     | 1     | 0     | 0     | 0     | 1     | 0     | 1     | 0     | 0     | 0     | 0     | 0     | 0     | 0     |
| Angola various                 | 65                    | 39                   | 1     | 0     | 0     | 0     | 0     | 1     | 0     | 0     | 1     | 1     | 1     | 0     | 0     | 0     | 0     | 0     | 1     | 0     | 0     | 0     | 0     | 1     | 0     | 0     |
| Somalia Danish various         | 201                   | 59                   | 0     | 0     | 0     | 0     | 0     | 0     | 0     | 0     | 0     | 0     | 0     | 0     | 0     | 0     | 0     | 0     | 1     | 0     | 0     | 0     | 0     | 0     | 0     | 0     |
| Tanzania Sandawa               | 66                    | 33                   | 1     | 1     | 0     | 0     | 0     | 0     | 0     | 0     | 0     | 1     | 0     | 0     | 0     | 0     | 0     | 0     | 0     | 0     | 0     | 0     | 0     | 0     | 0     | 1     |
| Tanzania various               | 132                   | 67                   | 1     | 1     | 0     | 0     | 0     | 1     | 0     | 0     | 1     | 1     | 1     | 1     | 0     | 0     | 0     | 0     | 1     | 0     | 0     | 0     | 0     | 0     | 0     | 0     |
| Uganda                         | 118                   | 52                   | 0     | 0     | 0     | 0     | 0     | 0     | 0     | 0     | 1     | 1     | 0     | 0     | 0     | 0     | 0     | 0     | 0     | 0     | 0     | 0     | 0     | 0     | 0     | 0     |
| Eastern Zambia, Eastern Bantus | 88                    | 49                   | 1     | 1     | 0     | 0     | 0     | 1     | 0     | 0     | 1     | 1     | 1     | 0     | 0     | 0     | 0     | 1     | 1     | 0     | 0     | 0     | 0     | 0     | 0     | 0     |
| Western Zambia, Eastern Bantus | 263                   | 109                  | 1     | 1     | 1     | 0     | 0     | 1     | 0     | 0     | 1     | 1     | 1     | 1     | 0     | 0     | 0     | 1     | 1     | 0     | 0     | 0     | 0     | 0     | 0     | 0     |
| Western Zambia, Western Bantus | 192                   | 82                   | 1     | 1     | 0     | 1     | 0     | 1     | 0     | 0     | 0     | 1     | 1     | 1     | 0     | 0     | 0     | 1     | 1     | 0     | 0     | 0     | 0     | 1     | 0     | 0     |

|                                |     |     |   |   |   |   |   |   |   |   |   |   |   |   |   |   |   |   |   |   |   |   |   |   |   |
|--------------------------------|-----|-----|---|---|---|---|---|---|---|---|---|---|---|---|---|---|---|---|---|---|---|---|---|---|---|
| <b>Tunisia</b>                 | 117 | 80  | 0 | 0 | 0 | 0 | 0 | 0 | 0 | 0 | 0 | 0 | 0 | 0 | 0 | 0 | 0 | 0 | 0 | 0 | 0 | 0 | 0 | 0 | 0 |
| <b>Tunisia Berbers various</b> | 66  | 25  | 0 | 0 | 0 | 0 | 0 | 0 | 0 | 0 | 0 | 0 | 0 | 0 | 0 | 0 | 0 | 0 | 0 | 0 | 0 | 0 | 0 | 0 | 0 |
| <b>Egypt various</b>           | 92  | 64  | 0 | 0 | 0 | 0 | 0 | 0 | 0 | 0 | 0 | 0 | 0 | 0 | 0 | 0 | 0 | 0 | 0 | 0 | 0 | 0 | 0 | 0 | 0 |
| <b>Algeria</b>                 | 100 | 54  | 0 | 1 | 0 | 0 | 0 | 0 | 0 | 0 | 1 | 0 | 0 | 0 | 0 | 0 | 0 | 0 | 0 | 0 | 0 | 0 | 0 | 0 | 1 |
| <b>Lybia</b>                   | 63  | 52  | 0 | 0 | 0 | 0 | 0 | 0 | 0 | 0 | 0 | 0 | 0 | 0 | 0 | 0 | 0 | 0 | 0 | 0 | 0 | 0 | 0 | 0 | 0 |
| <b>Morocco Moroccan</b>        | 515 | 212 | 1 | 1 | 0 | 1 | 0 | 1 | 0 | 0 | 1 | 1 | 0 | 0 | 0 | 0 | 0 | 0 | 0 | 0 | 0 | 0 | 0 | 0 | 0 |
| <b>Morocco Arabs various</b>   | 104 | 61  | 0 | 0 | 0 | 0 | 0 | 0 | 0 | 0 | 0 | 1 | 0 | 0 | 0 | 0 | 0 | 0 | 0 | 0 | 0 | 0 | 0 | 0 | 0 |
| <b>Mozabites</b>               | 68  | 22  | 0 | 0 | 0 | 0 | 0 | 0 | 0 | 0 | 0 | 0 | 0 | 0 | 0 | 0 | 0 | 0 | 0 | 0 | 0 | 0 | 0 | 0 | 0 |
| <b>Tunisia Sfax various</b>    | 105 | 64  | 0 | 0 | 0 | 0 | 0 | 0 | 0 | 0 | 0 | 0 | 0 | 0 | 0 | 0 | 0 | 0 | 0 | 0 | 0 | 0 | 0 | 0 | 1 |
| <b>Namibia</b>                 | 54  | 32  | 1 | 0 | 0 | 0 | 0 | 1 | 0 | 0 | 0 | 1 | 1 | 0 | 0 | 0 | 0 | 1 | 1 | 0 | 0 | 0 | 0 | 0 | 0 |
| <b>Iranian Iran</b>            | 128 | 93  | 0 | 0 | 0 | 0 | 0 | 0 | 0 | 0 | 0 | 0 | 0 | 0 | 0 | 0 | 0 | 0 | 0 | 0 | 0 | 0 | 0 | 0 | 0 |
| <b>Druzes Israel</b>           | 234 | 89  | 0 | 0 | 0 | 0 | 0 | 0 | 0 | 0 | 0 | 0 | 0 | 0 | 0 | 0 | 0 | 0 | 1 | 0 | 0 | 0 | 0 | 0 | 0 |
| <b>Lebanon</b>                 | 650 | 298 | 0 | 0 | 0 | 0 | 0 | 0 | 0 | 0 | 1 | 0 | 0 | 0 | 0 | 0 | 0 | 0 | 0 | 1 | 0 | 0 | 0 | 0 | 1 |
| <b>Palestine</b>               | 364 | 181 | 0 | 0 | 0 | 0 | 0 | 0 | 0 | 0 | 0 | 0 | 1 | 0 | 0 | 0 | 0 | 0 | 0 | 0 | 0 | 0 | 0 | 0 | 0 |
| <b>Kuwait</b>                  | 148 | 45  | 0 | 0 | 0 | 0 | 0 | 0 | 0 | 0 | 0 | 0 | 0 | 0 | 0 | 0 | 0 | 1 | 0 | 0 | 0 | 0 | 0 | 0 | 0 |
| <b>Oman</b>                    | 99  | 68  | 1 | 0 | 0 | 0 | 0 | 0 | 0 | 0 | 1 | 0 | 0 | 0 | 0 | 0 | 0 | 1 | 1 | 0 | 0 | 0 | 0 | 0 | 0 |
| <b>Saudi Arabia</b>            | 106 | 60  | 0 | 0 | 0 | 0 | 0 | 0 | 0 | 0 | 0 | 0 | 0 | 0 | 0 | 0 | 0 | 0 | 0 | 0 | 0 | 1 | 0 | 0 | 0 |
| <b>Yemen</b>                   | 104 | 52  | 0 | 0 | 0 | 0 | 0 | 0 | 0 | 0 | 1 | 0 | 0 | 0 | 0 | 0 | 0 | 0 | 0 | 0 | 0 | 0 | 0 | 0 | 1 |
| <b>Dubai</b>                   | 217 | 146 | 1 | 1 | 0 | 0 | 0 | 1 | 0 | 0 | 0 | 1 | 0 | 0 | 0 | 0 | 0 | 0 | 1 | 0 | 0 | 0 | 1 | 0 | 0 |
| <b>Iran</b>                    | 104 | 91  | 0 | 1 | 0 | 0 | 0 | 0 | 0 | 0 | 0 | 0 | 1 | 0 | 0 | 0 | 0 | 0 | 1 | 0 | 0 | 0 | 0 | 0 | 0 |
| <b>Cyprus</b>                  | 163 | 97  | 0 | 0 | 0 | 0 | 0 | 0 | 0 | 0 | 0 | 0 | 0 | 0 | 0 | 0 | 0 | 0 | 0 | 0 | 0 | 0 | 0 | 0 | 1 |
| <b>Syria Syrians</b>           | 161 | 124 | 0 | 0 | 0 | 0 | 0 | 0 | 0 | 0 | 0 | 0 | 0 | 0 | 0 | 0 | 0 | 0 | 0 | 0 | 0 | 0 | 0 | 0 | 1 |
| <b>Turkey various</b>          | 140 | 78  | 0 | 0 | 0 | 0 | 0 | 0 | 0 | 0 | 1 | 0 | 0 | 0 | 0 | 0 | 0 | 0 | 0 | 0 | 0 | 0 | 0 | 0 | 0 |
| <b>Turkey Anatolia</b>         | 520 | 330 | 0 | 0 | 0 | 0 | 0 | 0 | 0 | 0 | 1 | 0 | 0 | 0 | 0 | 0 | 0 | 0 | 0 | 0 | 0 | 0 | 0 | 0 | 1 |
| <b>Bangladesh</b>              | 284 | 197 | 0 | 0 | 0 | 0 | 0 | 0 | 0 | 0 | 0 | 0 | 0 | 0 | 0 | 0 | 0 | 0 | 0 | 0 | 0 | 0 | 0 | 0 | 0 |
| <b>Saraswat Brahmin</b>        | 122 | 92  | 0 | 0 | 0 | 0 | 0 | 0 | 0 | 0 | 0 | 0 | 0 | 0 | 0 | 0 | 0 | 0 | 0 | 0 | 0 | 0 | 0 | 0 | 0 |
| <b>India Tamil Nadu</b>        | 152 | 108 | 0 | 0 | 0 | 0 | 0 | 0 | 0 | 0 | 0 | 0 | 0 | 0 | 0 | 0 | 0 | 0 | 0 | 0 | 0 | 0 | 0 | 0 | 0 |
| <b>Jat Sikhs</b>               | 80  | 47  | 0 | 0 | 0 | 0 | 0 | 0 | 0 | 0 | 0 | 0 | 0 | 0 | 0 | 0 | 0 | 0 | 0 | 0 | 0 | 0 | 0 | 0 | 0 |
| <b>Northern India</b>          | 78  | 56  | 0 | 0 | 0 | 0 | 0 | 0 | 0 | 0 | 0 | 0 | 0 | 0 | 0 | 0 | 0 | 0 | 0 | 0 | 0 | 0 | 0 | 0 | 0 |
| <b>Eastern India</b>           | 127 | 77  | 0 | 0 | 0 | 0 | 0 | 0 | 0 | 0 | 0 | 0 | 0 | 0 | 0 | 0 | 0 | 0 | 0 | 0 | 0 | 0 | 0 | 0 | 0 |

|                                  |     |     |   |   |   |   |   |   |   |   |   |   |   |   |   |   |   |   |   |   |   |   |   |   |   |
|----------------------------------|-----|-----|---|---|---|---|---|---|---|---|---|---|---|---|---|---|---|---|---|---|---|---|---|---|---|
| <b>Southern India</b>            | 295 | 155 | 0 | 0 | 0 | 0 | 0 | 0 | 0 | 0 | 0 | 0 | 0 | 0 | 0 | 0 | 0 | 0 | 1 | 0 | 0 | 0 | 0 | 0 | 0 |
| <b>Central India</b>             | 69  | 27  | 0 | 0 | 0 | 0 | 0 | 0 | 0 | 0 | 0 | 0 | 0 | 0 | 0 | 0 | 0 | 0 | 0 | 0 | 0 | 0 | 0 | 0 | 0 |
| <b>Western India</b>             | 59  | 49  | 0 | 0 | 0 | 0 | 1 | 0 | 0 | 0 | 0 | 0 | 0 | 0 | 0 | 0 | 0 | 0 | 0 | 0 | 0 | 0 | 0 | 0 | 0 |
| <b>Mahadeokoli</b>               | 50  | 39  | 0 | 0 | 0 | 0 | 0 | 0 | 0 | 0 | 0 | 0 | 1 | 0 | 0 | 0 | 0 | 0 | 0 | 0 | 0 | 0 | 0 | 0 | 0 |
| <b>Thakar</b>                    | 48  | 28  | 0 | 0 | 0 | 0 | 0 | 0 | 0 | 0 | 0 | 0 | 0 | 0 | 0 | 0 | 0 | 0 | 0 | 0 | 0 | 0 | 0 | 0 | 0 |
| <b>Pakistan</b>                  | 177 | 119 | 0 | 0 | 0 | 0 | 0 | 1 | 0 | 0 | 0 | 0 | 0 | 0 | 0 | 0 | 0 | 0 | 0 | 0 | 0 | 0 | 0 | 0 | 0 |
| <b>Sri-Lanka</b>                 | 207 | 162 | 0 | 0 | 0 | 0 | 0 | 0 | 0 | 0 | 0 | 0 | 0 | 0 | 0 | 0 | 0 | 0 | 0 | 0 | 0 | 0 | 0 | 0 | 0 |
| <b>France</b>                    | 57  | 35  | 0 | 0 | 0 | 0 | 0 | 0 | 0 | 0 | 0 | 0 | 0 | 0 | 0 | 0 | 0 | 0 | 0 | 0 | 0 | 0 | 0 | 0 | 0 |
| <b>- Northern Portugal</b>       | 60  | 48  | 0 | 0 | 0 | 0 | 0 | 0 | 0 | 0 | 0 | 0 | 0 | 0 | 0 | 0 | 0 | 0 | 0 | 0 | 0 | 0 | 0 | 0 | 0 |
| <b>- Southern Portugal</b>       | 78  | 66  | 0 | 0 | 0 | 0 | 0 | 0 | 0 | 0 | 0 | 0 | 0 | 0 | 0 | 0 | 0 | 0 | 0 | 0 | 0 | 0 | 0 | 0 | 0 |
| <b>EasternAndalusia</b>          | 95  | 60  | 0 | 0 | 0 | 0 | 0 | 0 | 0 | 0 | 0 | 0 | 0 | 0 | 0 | 0 | 0 | 0 | 0 | 0 | 0 | 0 | 0 | 0 | 0 |
| <b>Galicia</b>                   | 89  | 65  | 0 | 0 | 0 | 0 | 0 | 0 | 0 | 0 | 0 | 0 | 0 | 0 | 0 | 0 | 0 | 0 | 0 | 0 | 0 | 0 | 0 | 0 | 0 |
| <b>Spain - Northern Castilla</b> | 130 | 85  | 0 | 0 | 0 | 0 | 0 | 0 | 0 | 0 | 0 | 0 | 0 | 0 | 0 | 0 | 0 | 0 | 0 | 0 | 0 | 0 | 0 | 0 | 0 |
| <b>Portuguese Jew</b>            | 86  | 49  | 0 | 0 | 0 | 0 | 0 | 0 | 0 | 0 | 0 | 0 | 0 | 0 | 0 | 0 | 0 | 0 | 0 | 0 | 0 | 0 | 0 | 0 | 0 |
| <b>Phillipines</b>               | 76  | 64  | 0 | 0 | 1 | 0 | 0 | 0 | 0 | 0 | 0 | 0 | 0 | 1 | 1 | 0 | 0 | 0 | 0 | 0 | 0 | 0 | 0 | 0 | 0 |
| <b>Malay Singapore</b>           | 180 | 134 | 0 | 0 | 1 | 0 | 0 | 0 | 0 | 0 | 0 | 0 | 0 | 0 | 1 | 0 | 0 | 0 | 0 | 0 | 0 | 0 | 0 | 0 | 0 |
| <b>Malay Malaysia</b>            | 334 | 245 | 0 | 0 | 1 | 0 | 0 | 0 | 0 | 1 | 0 | 0 | 0 | 0 | 1 | 1 | 0 | 0 | 0 | 0 | 0 | 0 | 0 | 0 | 0 |
| <b>Iban</b>                      | 105 | 57  | 0 | 0 | 0 | 0 | 0 | 0 | 0 | 0 | 0 | 0 | 0 | 0 | 1 | 0 | 0 | 0 | 0 | 0 | 0 | 0 | 0 | 0 | 0 |
| <b>Bidayuh</b>                   | 113 | 45  | 0 | 0 | 0 | 0 | 0 | 0 | 0 | 0 | 0 | 0 | 0 | 0 | 0 | 0 | 0 | 0 | 0 | 0 | 0 | 0 | 0 | 0 | 0 |
| <b>Melanau</b>                   | 104 | 39  | 0 | 0 | 1 | 0 | 0 | 0 | 0 | 0 | 0 | 0 | 0 | 0 | 1 | 0 | 0 | 0 | 0 | 0 | 0 | 0 | 0 | 0 | 0 |
| <b>Timor</b>                     | 113 | 81  | 0 | 0 | 1 | 0 | 0 | 0 | 0 | 0 | 0 | 0 | 1 | 0 | 1 | 0 | 0 | 0 | 0 | 0 | 0 | 0 | 0 | 0 | 0 |
| <b>Flores</b>                    | 385 | 126 | 0 | 0 | 0 | 0 | 0 | 0 | 0 | 0 | 0 | 0 | 0 | 0 | 0 | 0 | 0 | 0 | 0 | 1 | 0 | 0 | 0 | 0 | 1 |
| <b>Lembata</b>                   | 89  | 40  | 0 | 0 | 0 | 0 | 0 | 0 | 0 | 0 | 0 | 1 | 1 | 0 | 0 | 0 | 0 | 1 | 0 | 1 | 0 | 0 | 0 | 0 | 1 |
| <b>Sumba</b>                     | 349 | 73  | 0 | 0 | 1 | 0 | 0 | 0 | 0 | 0 | 0 | 0 | 0 | 0 | 1 | 0 | 0 | 0 | 1 | 0 | 0 | 0 | 0 | 0 | 0 |
| <b>Vietnam</b>                   | 113 | 84  | 0 | 0 | 0 | 0 | 0 | 0 | 0 | 0 | 0 | 0 | 0 | 0 | 0 | 0 | 0 | 0 | 0 | 0 | 0 | 0 | 0 | 0 | 0 |
| <b>Bali</b>                      | 632 | 171 | 0 | 0 | 1 | 0 | 0 | 0 | 0 | 0 | 0 | 0 | 0 | 0 | 1 | 1 | 0 | 0 | 0 | 0 | 0 | 0 | 0 | 0 | 0 |
| <b>Borneo</b>                    | 85  | 35  | 0 | 0 | 1 | 0 | 0 | 0 | 0 | 0 | 0 | 0 | 0 | 0 | 1 | 1 | 0 | 0 | 0 | 0 | 0 | 0 | 0 | 0 | 0 |
| <b>Java</b>                      | 61  | 37  | 0 | 0 | 1 | 0 | 0 | 0 | 0 | 0 | 0 | 0 | 0 | 0 | 0 | 0 | 0 | 0 | 0 | 0 | 0 | 0 | 0 | 0 | 0 |
| <b>Mentawai</b>                  | 73  | 18  | 0 | 0 | 0 | 0 | 0 | 0 | 0 | 1 | 0 | 0 | 0 | 0 | 0 | 1 | 0 | 0 | 0 | 0 | 0 | 0 | 0 | 0 | 0 |
| <b>Nias</b>                      | 60  | 15  | 0 | 0 | 1 | 0 | 0 | 0 | 0 | 1 | 0 | 0 | 0 | 0 | 0 | 1 | 0 | 0 | 0 | 0 | 1 | 0 | 0 | 0 | 0 |

|                             |    |    |   |   |   |   |   |   |   |   |   |   |   |   |   |   |   |   |   |   |   |   |   |   |   |
|-----------------------------|----|----|---|---|---|---|---|---|---|---|---|---|---|---|---|---|---|---|---|---|---|---|---|---|---|
| <b>Oceania various</b>      | 66 | 40 | 0 | 0 | 0 | 0 | 0 | 0 | 0 | 0 | 0 | 0 | 0 | 0 | 0 | 0 | 0 | 0 | 0 | 0 | 0 | 0 | 0 | 0 | 0 |
| <b>Papouasie New Guinea</b> | 47 | 42 | 0 | 0 | 0 | 0 | 0 | 0 | 0 | 0 | 1 | 0 | 0 | 0 | 0 | 0 | 0 | 0 | 0 | 0 | 0 | 0 | 0 | 0 | 0 |
| <b>Tahiti</b>               | 24 | 14 | 0 | 0 | 0 | 0 | 0 | 0 | 0 | 0 | 0 | 0 | 0 | 0 | 0 | 0 | 0 | 0 | 0 | 0 | 0 | 0 | 0 | 0 | 0 |
| <b>Vanuatu</b>              | 44 | 32 | 0 | 0 | 0 | 0 | 0 | 0 | 0 | 0 | 0 | 0 | 0 | 0 | 0 | 0 | 0 | 0 | 0 | 0 | 0 | 0 | 0 | 0 | 0 |
| <b>Thailand</b>             | 41 | 39 | 0 | 0 | 0 | 0 | 0 | 0 | 0 | 0 | 0 | 0 | 0 | 0 | 1 | 0 | 0 | 0 | 0 | 0 | 0 | 0 | 0 | 0 | 0 |

**Table S13.** Shared haplotypes between the Antalaotra and the database, using seven Y-STR markers

|                                 | Number of individuals | Number of haplotypes | Hap.01 | Hap.02 | Hap.03 | Hap.04 | Hap.05 | Hap.06 | Hap.07 | Hap.08 | Hap.09 | Hap.10 | Hap.11 | Hap.12 | Hap.13 | Hap.14 | Hap.15 | Hap.16 | Hap.17 | Hap.18 | Hap.19 | Hap.20 | Hap.21 |   |
|---------------------------------|-----------------------|----------------------|--------|--------|--------|--------|--------|--------|--------|--------|--------|--------|--------|--------|--------|--------|--------|--------|--------|--------|--------|--------|--------|---|
|                                 |                       |                      | E1b1a  | O1a2   | J2b    | E1b1a  | O1a2   | O1a2   | T1     | J1     | T1     | O2a1   | O2a1   | E2b    | O2a1   | O2a1   | J2b    | E2b    | J2b    | O2a1   | O2a1   | R1a1   | E1b1a  |   |
| <b>Ethiopia Omo valley</b>      | 67                    | 36                   | 0      | 0      | 1      | 0      | 0      | 0      | 0      | 0      | 0      | 0      | 0      | 0      | 0      | 0      | 0      | 0      | 0      | 0      | 0      | 0      | 0      | 0 |
| <b>Kenya Massai</b>             | 55                    | 40                   | 1      | 0      | 1      | 0      | 0      | 0      | 0      | 0      | 0      | 0      | 0      | 0      | 0      | 0      | 0      | 0      | 0      | 0      | 0      | 0      | 0      | 0 |
| <b>Equatorial Guinea</b>        | 101                   | 63                   | 1      | 0      | 0      | 1      | 0      | 0      | 0      | 0      | 0      | 0      | 0      | 0      | 0      | 0      | 0      | 0      | 0      | 0      | 0      | 0      | 0      | 1 |
| <b>Gabon</b>                    | 828                   | 239                  | 1      | 0      | 0      | 1      | 0      | 0      | 0      | 0      | 0      | 0      | 1      | 1      | 0      | 0      | 0      | 1      | 0      | 0      | 0      | 0      | 0      | 1 |
| <b>Benin</b>                    | 78                    | 51                   | 1      | 0      | 0      | 1      | 0      | 0      | 0      | 0      | 0      | 0      | 0      | 0      | 0      | 0      | 0      | 0      | 0      | 0      | 0      | 0      | 0      | 1 |
| <b>Ivory coast</b>              | 90                    | 50                   | 1      | 0      | 0      | 0      | 0      | 0      | 0      | 0      | 0      | 0      | 0      | 0      | 0      | 0      | 0      | 0      | 0      | 0      | 0      | 0      | 0      | 1 |
| <b>African central Republic</b> | 165                   | 74                   | 1      | 0      | 0      | 1      | 0      | 0      | 0      | 0      | 0      | 0      | 0      | 0      | 0      | 0      | 0      | 0      | 0      | 0      | 0      | 0      | 0      | 1 |
| <b>Guinea Bissau</b>            | 161                   | 106                  | 1      | 0      | 0      | 1      | 0      | 0      | 0      | 0      | 0      | 0      | 0      | 0      | 0      | 0      | 0      | 0      | 0      | 0      | 0      | 0      | 0      | 1 |
| <b>Burkina Faso</b>             | 323                   | 142                  | 1      | 0      | 0      | 0      | 0      | 0      | 0      | 0      | 0      | 0      | 0      | 0      | 0      | 0      | 0      | 0      | 0      | 0      | 0      | 0      | 0      | 1 |
| <b>Mozambique</b>               | 154                   | 56                   | 1      | 0      | 0      | 1      | 0      | 0      | 0      | 0      | 0      | 0      | 0      | 1      | 0      | 0      | 0      | 0      | 0      | 0      | 0      | 0      | 0      | 1 |
| <b>Angola Nyaneka</b>           | 75                    | 40                   | 0      | 0      | 0      | 1      | 0      | 0      | 0      | 0      | 0      | 0      | 0      | 0      | 0      | 0      | 0      | 1      | 0      | 0      | 0      | 0      | 0      | 1 |
| <b>Angola Ovimbudu</b>          | 96                    | 43                   | 1      | 0      | 0      | 1      | 0      | 0      | 0      | 0      | 0      | 0      | 0      | 0      | 0      | 0      | 0      | 0      | 0      | 0      | 0      | 0      | 0      | 1 |
| <b>Angola various</b>           | 65                    | 39                   | 0      | 0      | 0      | 1      | 0      | 0      | 0      | 0      | 0      | 0      | 0      | 1      | 0      | 0      | 0      | 0      | 0      | 0      | 0      | 0      | 0      | 1 |
| <b>Somalia Danish various</b>   | 201                   | 59                   | 0      | 0      | 0      | 0      | 0      | 0      | 0      | 0      | 0      | 0      | 0      | 0      | 0      | 0      | 0      | 0      | 0      | 0      | 0      | 0      | 0      | 0 |
| <b>Tanzania Sandawa</b>         | 66                    | 33                   | 1      | 0      | 0      | 0      | 0      | 0      | 0      | 0      | 0      | 0      | 0      | 0      | 0      | 0      | 0      | 0      | 0      | 0      | 0      | 0      | 0      | 0 |

|                                       |     |     |   |   |   |   |   |   |   |   |   |   |   |   |   |   |   |   |   |   |   |   |   |
|---------------------------------------|-----|-----|---|---|---|---|---|---|---|---|---|---|---|---|---|---|---|---|---|---|---|---|---|
| <b>Tanzania various</b>               | 132 | 67  | 1 | 0 | 0 | 1 | 0 | 0 | 0 | 0 | 0 | 0 | 0 | 0 | 0 | 0 | 1 | 0 | 0 | 0 | 0 | 0 | 1 |
| <b>Uganda</b>                         | 118 | 52  | 0 | 0 | 0 | 0 | 0 | 0 | 0 | 0 | 0 | 0 | 0 | 0 | 0 | 0 | 0 | 0 | 1 | 0 | 0 | 0 | 0 |
| <b>Eastern Zambia, Eastern Bantus</b> | 88  | 49  | 1 | 0 | 0 | 1 | 0 | 0 | 0 | 0 | 0 | 0 | 0 | 1 | 0 | 0 | 0 | 0 | 0 | 0 | 0 | 0 | 1 |
| <b>Western Zambia, Eastern Bantus</b> | 263 | 109 | 1 | 1 | 0 | 1 | 0 | 0 | 0 | 0 | 0 | 0 | 0 | 0 | 0 | 0 | 0 | 0 | 0 | 0 | 0 | 0 | 1 |
| <b>Western Zambia, Western Bantus</b> | 192 | 82  | 1 | 0 | 0 | 1 | 0 | 0 | 0 | 0 | 0 | 0 | 0 | 1 | 0 | 0 | 0 | 0 | 0 | 0 | 0 | 0 | 1 |
| <b>Tunisia</b>                        | 117 | 80  | 0 | 0 | 0 | 0 | 0 | 0 | 0 | 0 | 0 | 0 | 0 | 0 | 0 | 0 | 0 | 0 | 0 | 0 | 0 | 0 | 0 |
| <b>Tunisia Berbers various</b>        | 66  | 25  | 0 | 0 | 0 | 0 | 0 | 0 | 0 | 0 | 0 | 0 | 0 | 0 | 0 | 0 | 0 | 0 | 0 | 0 | 0 | 0 | 0 |
| <b>Egypt various</b>                  | 92  | 64  | 0 | 0 | 0 | 0 | 0 | 0 | 0 | 0 | 0 | 0 | 0 | 0 | 0 | 0 | 0 | 0 | 0 | 0 | 0 | 0 | 0 |
| <b>Algeria</b>                        | 100 | 54  | 1 | 0 | 0 | 0 | 0 | 0 | 0 | 1 | 0 | 0 | 0 | 0 | 0 | 0 | 0 | 0 | 0 | 0 | 0 | 1 | 1 |
| <b>Lybia</b>                          | 63  | 52  | 0 | 0 | 0 | 0 | 0 | 0 | 0 | 0 | 0 | 0 | 0 | 0 | 0 | 0 | 0 | 0 | 0 | 0 | 0 | 0 | 0 |
| <b>Morocco Moroccan</b>               | 515 | 212 | 1 | 0 | 0 | 1 | 0 | 0 | 0 | 1 | 0 | 0 | 0 | 0 | 0 | 0 | 0 | 0 | 0 | 0 | 0 | 0 | 1 |
| <b>Morocco Arabs various</b>          | 104 | 61  | 0 | 0 | 0 | 0 | 0 | 0 | 0 | 0 | 0 | 0 | 0 | 0 | 0 | 0 | 0 | 0 | 0 | 0 | 0 | 0 | 0 |
| <b>Mozabites</b>                      | 68  | 22  | 0 | 0 | 0 | 0 | 0 | 0 | 0 | 0 | 0 | 0 | 0 | 0 | 0 | 0 | 0 | 0 | 0 | 0 | 0 | 0 | 0 |
| <b>Tunisia Sfax various</b>           | 105 | 64  | 0 | 0 | 0 | 0 | 0 | 0 | 0 | 0 | 0 | 0 | 0 | 0 | 0 | 0 | 0 | 0 | 0 | 0 | 0 | 0 | 0 |
| <b>Namibia</b>                        | 54  | 32  | 0 | 0 | 0 | 1 | 0 | 0 | 0 | 0 | 0 | 0 | 0 | 1 | 0 | 0 | 0 | 0 | 0 | 0 | 0 | 0 | 1 |
| <b>Iranian Iran</b>                   | 128 | 93  | 0 | 0 | 0 | 0 | 0 | 0 | 0 | 0 | 0 | 0 | 0 | 0 | 0 | 0 | 0 | 0 | 0 | 0 | 0 | 0 | 0 |
| <b>Druzes Israel</b>                  | 234 | 89  | 0 | 0 | 0 | 0 | 0 | 0 | 1 | 0 | 0 | 0 | 0 | 0 | 0 | 0 | 0 | 0 | 0 | 0 | 0 | 0 | 0 |
| <b>Lebanon</b>                        | 650 | 298 | 0 | 0 | 0 | 0 | 0 | 0 | 1 | 1 | 0 | 0 | 0 | 0 | 0 | 0 | 0 | 0 | 0 | 0 | 0 | 0 | 0 |
| <b>Palestine</b>                      | 364 | 181 | 0 | 0 | 0 | 0 | 0 | 0 | 1 | 1 | 0 | 0 | 0 | 1 | 0 | 0 | 0 | 0 | 0 | 0 | 0 | 0 | 1 |
| <b>Kuwait</b>                         | 148 | 45  | 0 | 0 | 0 | 0 | 0 | 0 | 0 | 0 | 0 | 0 | 0 | 0 | 0 | 0 | 0 | 0 | 0 | 0 | 0 | 0 | 1 |
| <b>Oman</b>                           | 99  | 68  | 0 | 0 | 0 | 0 | 0 | 0 | 0 | 0 | 0 | 0 | 0 | 1 | 0 | 0 | 0 | 0 | 0 | 0 | 0 | 1 | 0 |
| <b>Saudi Arabia</b>                   | 106 | 60  | 0 | 0 | 0 | 0 | 0 | 0 | 0 | 0 | 0 | 0 | 0 | 0 | 0 | 0 | 1 | 0 | 0 | 0 | 0 | 0 | 0 |
| <b>Yemen</b>                          | 104 | 52  | 0 | 0 | 0 | 0 | 0 | 0 | 0 | 0 | 0 | 0 | 0 | 0 | 0 | 0 | 0 | 0 | 0 | 0 | 0 | 0 | 0 |
| <b>Dubai</b>                          | 217 | 146 | 1 | 0 | 0 | 1 | 0 | 0 | 0 | 1 | 0 | 0 | 0 | 1 | 0 | 0 | 0 | 0 | 0 | 0 | 0 | 0 | 1 |
| <b>Iran</b>                           | 104 | 91  | 1 | 0 | 0 | 0 | 0 | 0 | 0 | 0 | 0 | 0 | 0 | 0 | 0 | 0 | 0 | 0 | 0 | 0 | 0 | 0 | 1 |
| <b>Cyprus</b>                         | 163 | 97  | 0 | 0 | 0 | 0 | 0 | 0 | 1 | 0 | 0 | 0 | 0 | 0 | 0 | 0 | 0 | 0 | 0 | 0 | 0 | 0 | 0 |
| <b>Syria Syrians</b>                  | 161 | 124 | 0 | 0 | 0 | 0 | 0 | 0 | 1 | 0 | 0 | 0 | 0 | 0 | 0 | 1 | 0 | 0 | 0 | 0 | 0 | 1 | 0 |
| <b>Turkey various</b>                 | 140 | 78  | 0 | 0 | 0 | 0 | 0 | 0 | 0 | 0 | 0 | 0 | 0 | 0 | 0 | 0 | 0 | 0 | 0 | 0 | 0 | 1 | 0 |
| <b>Turkey Anatolia</b>                | 520 | 330 | 0 | 0 | 0 | 0 | 0 | 0 | 1 | 0 | 0 | 0 | 0 | 0 | 0 | 1 | 0 | 0 | 0 | 0 | 0 | 1 | 0 |
| <b>Bangladesh</b>                     | 284 | 197 | 0 | 0 | 0 | 0 | 0 | 0 | 0 | 0 | 1 | 0 | 0 | 1 | 0 | 0 | 0 | 0 | 1 | 0 | 1 | 0 | 0 |
| <b>Saraswat Brahmin</b>               | 122 | 92  | 0 | 0 | 0 | 0 | 0 | 0 | 0 | 0 | 0 | 0 | 0 | 0 | 0 | 0 | 0 | 0 | 0 | 0 | 0 | 1 | 0 |
| <b>India Tamil Nadu</b>               | 152 | 108 | 0 | 0 | 0 | 0 | 0 | 0 | 0 | 0 | 0 | 0 | 0 | 0 | 0 | 1 | 0 | 0 | 0 | 0 | 0 | 1 | 0 |
| <b>Jat Sikhs</b>                      | 80  | 47  | 0 | 0 | 0 | 0 | 0 | 0 | 0 | 0 | 0 | 0 | 0 | 0 | 0 | 0 | 0 | 0 | 0 | 0 | 0 | 1 | 0 |
| <b>Northern India</b>                 | 78  | 56  | 0 | 0 | 0 | 0 | 0 | 0 | 1 | 0 | 0 | 0 | 0 | 0 | 0 | 0 | 0 | 0 | 0 | 0 | 0 | 0 | 0 |

|                                  |     |     |   |   |   |   |   |   |   |   |   |   |   |   |   |   |   |   |   |   |   |   |   |
|----------------------------------|-----|-----|---|---|---|---|---|---|---|---|---|---|---|---|---|---|---|---|---|---|---|---|---|
| <b>Eastern India</b>             | 127 | 77  | 0 | 0 | 0 | 0 | 0 | 0 | 0 | 1 | 0 | 0 | 0 | 0 | 0 | 0 | 0 | 0 | 0 | 0 | 0 | 0 | 0 |
| <b>Southern India</b>            | 295 | 155 | 0 | 0 | 0 | 0 | 0 | 0 | 0 | 0 | 0 | 1 | 1 | 0 | 0 | 0 | 0 | 0 | 0 | 0 | 0 | 0 | 0 |
| <b>Central India</b>             | 69  | 27  | 0 | 0 | 0 | 0 | 0 | 0 | 0 | 0 | 0 | 1 | 0 | 0 | 0 | 0 | 0 | 0 | 0 | 0 | 0 | 0 | 0 |
| <b>Western India</b>             | 59  | 49  | 0 | 0 | 1 | 0 | 0 | 0 | 0 | 0 | 0 | 0 | 0 | 0 | 0 | 0 | 0 | 0 | 0 | 0 | 0 | 1 | 0 |
| <b>Mahadeokoli</b>               | 50  | 39  | 0 | 0 | 0 | 0 | 0 | 0 | 0 | 0 | 0 | 0 | 0 | 0 | 0 | 0 | 0 | 0 | 0 | 0 | 0 | 0 | 0 |
| <b>Thakar</b>                    | 48  | 28  | 0 | 0 | 0 | 0 | 0 | 0 | 0 | 0 | 0 | 0 | 0 | 0 | 0 | 0 | 0 | 0 | 0 | 0 | 0 | 0 | 0 |
| <b>Pakistan</b>                  | 177 | 119 | 0 | 0 | 0 | 1 | 0 | 0 | 0 | 1 | 0 | 0 | 0 | 0 | 0 | 0 | 0 | 0 | 0 | 0 | 0 | 0 | 0 |
| <b>Sri-Lanka</b>                 | 207 | 162 | 0 | 0 | 0 | 0 | 0 | 0 | 0 | 0 | 0 | 0 | 0 | 0 | 0 | 0 | 0 | 0 | 0 | 0 | 0 | 1 | 0 |
| <b>France</b>                    | 57  | 35  | 0 | 0 | 0 | 0 | 0 | 0 | 0 | 0 | 0 | 1 | 0 | 0 | 0 | 0 | 0 | 0 | 0 | 0 | 0 | 0 | 0 |
| <b>Northern Portugal</b>         | 60  | 48  | 0 | 0 | 0 | 0 | 0 | 0 | 0 | 0 | 0 | 0 | 0 | 0 | 0 | 0 | 0 | 0 | 0 | 0 | 0 | 0 | 0 |
| <b>Southern Portugal</b>         | 78  | 66  | 0 | 0 | 0 | 0 | 0 | 0 | 0 | 0 | 0 | 0 | 0 | 0 | 0 | 0 | 0 | 0 | 0 | 0 | 0 | 0 | 0 |
| <b>Eastern Andalusia</b>         | 95  | 60  | 0 | 0 | 0 | 0 | 0 | 0 | 0 | 1 | 0 | 0 | 0 | 0 | 0 | 0 | 0 | 0 | 0 | 0 | 0 | 0 | 0 |
| <b>Galicia</b>                   | 89  | 65  | 0 | 0 | 0 | 0 | 0 | 0 | 0 | 0 | 0 | 0 | 0 | 0 | 0 | 0 | 0 | 0 | 0 | 0 | 0 | 0 | 0 |
| <b>Spain - Northern Castilla</b> | 130 | 85  | 0 | 0 | 0 | 0 | 0 | 0 | 0 | 0 | 0 | 1 | 0 | 1 | 1 | 0 | 0 | 0 | 0 | 0 | 0 | 0 | 0 |
| <b>Portuguese Jew</b>            | 86  | 49  | 0 | 0 | 0 | 0 | 0 | 0 | 0 | 1 | 0 | 0 | 0 | 0 | 0 | 0 | 0 | 0 | 0 | 0 | 0 | 0 | 0 |
| <b>Phillipines</b>               | 76  | 64  | 0 | 1 | 0 | 0 | 1 | 1 | 0 | 0 | 0 | 0 | 0 | 0 | 0 | 0 | 0 | 0 | 0 | 0 | 0 | 0 | 0 |
| <b>Malay Singapore</b>           | 180 | 134 | 0 | 1 | 0 | 0 | 0 | 1 | 0 | 0 | 0 | 1 | 0 | 0 | 1 | 0 | 0 | 0 | 0 | 0 | 0 | 0 | 0 |
| <b>Malay Malaysia</b>            | 334 | 245 | 0 | 1 | 0 | 0 | 1 | 1 | 0 | 0 | 0 | 1 | 1 | 0 | 1 | 0 | 0 | 0 | 0 | 1 | 0 | 1 | 0 |
| <b>Iban</b>                      | 105 | 57  | 0 | 0 | 0 | 0 | 0 | 1 | 0 | 0 | 0 | 0 | 0 | 1 | 0 | 0 | 0 | 0 | 0 | 1 | 0 | 0 | 0 |
| <b>Bidayuh</b>                   | 113 | 45  | 0 | 0 | 0 | 0 | 0 | 0 | 0 | 0 | 0 | 0 | 0 | 1 | 0 | 0 | 0 | 0 | 0 | 0 | 0 | 0 | 0 |
| <b>Melanau</b>                   | 104 | 39  | 0 | 1 | 0 | 0 | 0 | 1 | 0 | 0 | 0 | 1 | 0 | 0 | 1 | 0 | 0 | 0 | 0 | 0 | 0 | 0 | 0 |
| <b>Timor</b>                     | 113 | 81  | 0 | 1 | 0 | 0 | 1 | 0 | 0 | 0 | 0 | 1 | 0 | 0 | 0 | 0 | 0 | 0 | 0 | 0 | 0 | 0 | 1 |
| <b>Flores</b>                    | 385 | 126 | 0 | 0 | 0 | 0 | 0 | 0 | 0 | 0 | 0 | 0 | 0 | 0 | 0 | 0 | 0 | 0 | 0 | 0 | 0 | 0 | 1 |
| <b>Lembata</b>                   | 89  | 40  | 0 | 0 | 0 | 0 | 0 | 0 | 0 | 0 | 0 | 0 | 0 | 0 | 0 | 0 | 0 | 0 | 0 | 0 | 0 | 0 | 0 |
| <b>Sumba</b>                     | 349 | 73  | 0 | 1 | 0 | 0 | 0 | 1 | 1 | 0 | 0 | 0 | 0 | 0 | 0 | 0 | 0 | 0 | 0 | 0 | 0 | 0 | 0 |
| <b>Vietnam</b>                   | 113 | 84  | 0 | 0 | 0 | 0 | 0 | 0 | 0 | 0 | 1 | 1 | 0 | 0 | 0 | 0 | 0 | 0 | 0 | 0 | 0 | 0 | 0 |
| <b>Bali</b>                      | 632 | 171 | 0 | 1 | 0 | 0 | 1 | 1 | 0 | 0 | 0 | 1 | 1 | 0 | 1 | 0 | 0 | 0 | 0 | 0 | 1 | 0 | 0 |
| <b>Borneo</b>                    | 85  | 35  | 0 | 1 | 0 | 0 | 1 | 1 | 0 | 0 | 0 | 1 | 0 | 0 | 1 | 0 | 0 | 0 | 0 | 0 | 0 | 0 | 0 |
| <b>Java</b>                      | 61  | 37  | 0 | 1 | 0 | 0 | 0 | 0 | 0 | 0 | 0 | 1 | 1 | 0 | 1 | 0 | 0 | 0 | 0 | 0 | 0 | 0 | 0 |
| <b>Mentawai</b>                  | 73  | 18  | 0 | 0 | 0 | 0 | 0 | 1 | 0 | 0 | 0 | 0 | 0 | 0 | 0 | 0 | 0 | 0 | 0 | 0 | 0 | 0 | 0 |
| <b>Nias</b>                      | 60  | 15  | 0 | 1 | 0 | 0 | 0 | 1 | 0 | 0 | 0 | 0 | 0 | 0 | 0 | 0 | 0 | 0 | 0 | 0 | 0 | 0 | 0 |
| <b>Oceania various</b>           | 66  | 40  | 0 | 0 | 0 | 0 | 0 | 0 | 0 | 0 | 0 | 0 | 0 | 0 | 0 | 0 | 0 | 0 | 0 | 0 | 0 | 0 | 0 |
| <b>Papouasie New Guinea</b>      | 47  | 42  | 0 | 0 | 0 | 0 | 0 | 0 | 0 | 0 | 0 | 0 | 0 | 0 | 0 | 0 | 0 | 0 | 0 | 0 | 0 | 0 | 1 |
| <b>Tahiti</b>                    | 24  | 14  | 0 | 0 | 0 | 0 | 0 | 0 | 0 | 0 | 0 | 0 | 0 | 0 | 0 | 0 | 0 | 0 | 0 | 0 | 0 | 0 | 0 |
| <b>Vanuatu</b>                   | 44  | 32  | 0 | 0 | 0 | 0 | 0 | 0 | 0 | 0 | 0 | 0 | 0 | 0 | 0 | 0 | 0 | 0 | 0 | 0 | 0 | 0 | 0 |
| <b>Thailand</b>                  | 41  | 39  | 0 | 0 | 0 | 0 | 0 | 1 | 0 | 0 | 0 | 0 | 0 | 0 | 1 | 0 | 0 | 0 | 0 | 1 | 0 | 0 | 0 |

**Table S14.** Shared haplotypes between the Anteony and the database using seven Y-STR markers

|                                | Number of individuals | Number of haplotypes | Hap.01 | Hap.02 | Hap.03 | Hap.04 | Hap.05 | Hap.06 | Hap.07 | Hap.08 | Hap.09 | Hap.10 | Hap.11 | Hap.12 |
|--------------------------------|-----------------------|----------------------|--------|--------|--------|--------|--------|--------|--------|--------|--------|--------|--------|--------|
|                                |                       |                      | E1b1a  | E1b1a  | E1b1a  | E1b1a  | T1     | J1     | T1     | T1     | T1     | E1b1b  | O2a1   | T1     |
| Ethiopia Omo valley            | 67                    | 36                   | 0      | 0      | 0      | 0      | 0      | 0      | 0      | 0      | 0      | 1      | 0      | 0      |
| Kenya Massai                   | 55                    | 40                   | 0      | 1      | 0      | 0      | 0      | 0      | 0      | 0      | 0      | 0      | 0      | 0      |
| Equatorial Guinea              | 101                   | 63                   | 1      | 1      | 1      | 0      | 0      | 0      | 0      | 0      | 0      | 0      | 0      | 0      |
| Gabon                          | 828                   | 239                  | 1      | 1      | 1      | 0      | 0      | 0      | 0      | 0      | 0      | 0      | 0      | 0      |
| Benin                          | 78                    | 51                   | 1      | 1      | 1      | 0      | 0      | 0      | 0      | 0      | 0      | 0      | 0      | 0      |
| Ivory coast                    | 90                    | 50                   | 1      | 1      | 0      | 0      | 0      | 0      | 0      | 0      | 0      | 0      | 0      | 0      |
| African central Republic       | 165                   | 74                   | 1      | 1      | 1      | 0      | 0      | 0      | 0      | 0      | 0      | 0      | 0      | 0      |
| Guinea Bissau                  | 161                   | 106                  | 1      | 1      | 1      | 0      | 0      | 0      | 0      | 0      | 0      | 1      | 0      | 0      |
| Burkina Faso                   | 323                   | 142                  | 1      | 1      | 0      | 0      | 0      | 0      | 0      | 0      | 0      | 1      | 0      | 0      |
| Mozambique                     | 154                   | 56                   | 1      | 1      | 1      | 0      | 0      | 0      | 0      | 0      | 0      | 0      | 0      | 0      |
| Angola Nyaneka                 | 75                    | 40                   | 1      | 0      | 1      | 0      | 0      | 0      | 0      | 0      | 0      | 0      | 0      | 0      |
| Angola Ovimbudu                | 96                    | 43                   | 1      | 1      | 1      | 0      | 0      | 0      | 0      | 0      | 0      | 0      | 0      | 0      |
| Angola various                 | 65                    | 39                   | 1      | 0      | 1      | 0      | 0      | 0      | 0      | 0      | 0      | 0      | 0      | 1      |
| Somalia Danish various         | 201                   | 59                   | 0      | 0      | 0      | 0      | 0      | 0      | 0      | 0      | 0      | 0      | 0      | 0      |
| Tanzania Sandawa               | 66                    | 33                   | 1      | 1      | 0      | 0      | 0      | 0      | 0      | 0      | 0      | 0      | 0      | 0      |
| Tanzania various               | 132                   | 67                   | 1      | 1      | 1      | 0      | 0      | 0      | 0      | 0      | 0      | 0      | 0      | 0      |
| Uganda                         | 118                   | 52                   | 0      | 0      | 0      | 0      | 0      | 0      | 0      | 0      | 0      | 1      | 0      | 0      |
| Eastern Zambia, Eastern Bantus | 88                    | 49                   | 1      | 1      | 1      | 0      | 0      | 0      | 0      | 0      | 0      | 0      | 0      | 0      |
| Western Zambia, Eastern Bantus | 263                   | 109                  | 1      | 1      | 1      | 0      | 0      | 0      | 0      | 0      | 0      | 0      | 0      | 0      |
| Western Zambia, Western Bantus | 192                   | 82                   | 1      | 1      | 1      | 0      | 0      | 0      | 0      | 0      | 0      | 0      | 0      | 0      |
| Tunisia                        | 117                   | 80                   | 0      | 0      | 0      | 0      | 0      | 0      | 0      | 0      | 0      | 0      | 0      | 0      |

|                                |            |     |   |   |   |   |   |   |   |   |   |   |   |   |
|--------------------------------|------------|-----|---|---|---|---|---|---|---|---|---|---|---|---|
| <b>Tunisia Berbers various</b> | <b>66</b>  | 25  | 0 | 0 | 0 | 0 | 0 | 0 | 0 | 0 | 0 | 0 | 0 | 0 |
| <b>Egypt various</b>           | <b>92</b>  | 64  | 0 | 0 | 0 | 0 | 0 | 0 | 0 | 0 | 0 | 0 | 0 | 0 |
| <b>Algeria</b>                 | <b>100</b> | 54  | 0 | 1 | 0 | 0 | 0 | 1 | 0 | 0 | 0 | 0 | 0 | 0 |
| <b>Lybia</b>                   | <b>63</b>  | 52  | 0 | 0 | 0 | 0 | 0 | 0 | 0 | 0 | 0 | 0 | 0 | 0 |
| <b>Morocco Moroccan</b>        | <b>515</b> | 212 | 1 | 1 | 1 | 0 | 0 | 1 | 0 | 0 | 0 | 0 | 0 | 0 |
| <b>Morocco Arabs various</b>   | <b>104</b> | 61  | 0 | 0 | 0 | 0 | 0 | 0 | 0 | 0 | 0 | 1 | 0 | 0 |
| <b>Mozabites</b>               | <b>68</b>  | 22  | 0 | 0 | 0 | 0 | 0 | 0 | 0 | 0 | 0 | 0 | 0 | 0 |
| <b>Tunisia Sfax various</b>    | <b>105</b> | 64  | 0 | 0 | 0 | 0 | 0 | 0 | 0 | 0 | 0 | 0 | 0 | 0 |
| <b>Namibia</b>                 | <b>54</b>  | 32  | 1 | 0 | 1 | 0 | 0 | 0 | 0 | 0 | 0 | 0 | 0 | 0 |
| <b>Iranian Iran</b>            | <b>128</b> | 93  | 0 | 0 | 0 | 0 | 0 | 0 | 0 | 0 | 0 | 0 | 0 | 0 |
| <b>Druzes Israel</b>           | <b>234</b> | 89  | 0 | 0 | 0 | 0 | 1 | 0 | 0 | 0 | 0 | 1 | 0 | 0 |
| <b>Lebanon</b>                 | <b>650</b> | 298 | 0 | 0 | 0 | 0 | 1 | 1 | 0 | 1 | 0 | 1 | 0 | 0 |
| <b>Palestine</b>               | <b>364</b> | 181 | 0 | 0 | 0 | 0 | 1 | 1 | 0 | 0 | 0 | 1 | 0 | 0 |
| <b>Kuwait</b>                  | <b>148</b> | 45  | 0 | 0 | 0 | 0 | 0 | 0 | 0 | 0 | 0 | 0 | 0 | 0 |
| <b>Oman</b>                    | <b>99</b>  | 68  | 1 | 0 | 0 | 0 | 0 | 0 | 0 | 0 | 0 | 0 | 0 | 0 |
| <b>Saudi Arabia</b>            | <b>106</b> | 60  | 0 | 0 | 0 | 0 | 0 | 0 | 0 | 0 | 0 | 0 | 0 | 0 |
| <b>Yemen</b>                   | <b>104</b> | 52  | 0 | 0 | 0 | 0 | 0 | 0 | 0 | 0 | 0 | 1 | 0 | 0 |
| <b>Dubai</b>                   | <b>217</b> | 146 | 1 | 1 | 1 | 0 | 0 | 1 | 0 | 0 | 0 | 1 | 0 | 0 |
| <b>Iran</b>                    | <b>104</b> | 91  | 0 | 1 | 0 | 0 | 0 | 0 | 0 | 0 | 0 | 0 | 0 | 0 |
| <b>Cyprus</b>                  | <b>163</b> | 97  | 0 | 0 | 0 | 0 | 0 | 1 | 0 | 0 | 0 | 1 | 0 | 0 |
| <b>Syria Syrians</b>           | <b>161</b> | 124 | 0 | 0 | 0 | 0 | 0 | 1 | 0 | 0 | 0 | 0 | 0 | 0 |
| <b>Turkey various</b>          | <b>140</b> | 78  | 0 | 0 | 0 | 0 | 0 | 0 | 0 | 0 | 0 | 0 | 0 | 0 |
| <b>Turkey Anatolia</b>         | <b>520</b> | 330 | 0 | 0 | 0 | 0 | 0 | 1 | 0 | 1 | 0 | 1 | 0 | 1 |
| <b>Bangladesh</b>              | <b>284</b> | 197 | 0 | 0 | 0 | 0 | 0 | 0 | 0 | 0 | 0 | 0 | 1 | 0 |
| <b>Saraswat Brahmin</b>        | <b>122</b> | 92  | 0 | 0 | 0 | 0 | 0 | 0 | 0 | 0 | 0 | 0 | 0 | 0 |
| <b>India Tamil Nadu</b>        | <b>152</b> | 108 | 0 | 0 | 0 | 0 | 0 | 0 | 0 | 0 | 0 | 0 | 0 | 0 |
| <b>Jat Sikhs</b>               | <b>80</b>  | 47  | 0 | 0 | 0 | 0 | 0 | 0 | 0 | 0 | 0 | 0 | 0 | 0 |
| <b>Northern India</b>          | <b>78</b>  | 56  | 0 | 0 | 0 | 0 | 0 | 1 | 0 | 0 | 0 | 0 | 0 | 0 |
| <b>Eastern Indian</b>          | <b>127</b> | 77  | 0 | 0 | 0 | 0 | 0 | 1 | 0 | 0 | 0 | 0 | 0 | 0 |



|                                  |            |     |   |   |   |   |   |   |   |   |   |   |   |   |   |
|----------------------------------|------------|-----|---|---|---|---|---|---|---|---|---|---|---|---|---|
| <b>Southern India</b>            | <b>295</b> | 155 | 0 | 0 | 0 | 0 | 0 | 0 | 0 | 0 | 0 | 0 | 0 | 1 | 0 |
| <b>Central India</b>             | <b>69</b>  | 27  | 0 | 0 | 0 | 0 | 0 | 0 | 0 | 0 | 0 | 0 | 0 | 1 | 0 |
| <b>Western India</b>             | <b>59</b>  | 49  | 0 | 0 | 0 | 0 | 0 | 0 | 0 | 0 | 0 | 0 | 0 | 0 | 0 |
| <b>Mahadeokoli</b>               | <b>50</b>  | 39  | 0 | 0 | 0 | 0 | 0 | 0 | 0 | 0 | 0 | 0 | 0 | 0 | 0 |
| <b>Thakar</b>                    | <b>48</b>  | 28  | 0 | 0 | 0 | 0 | 0 | 0 | 0 | 0 | 0 | 0 | 0 | 0 | 0 |
| <b>Pakistan</b>                  | <b>177</b> | 119 | 0 | 0 | 1 | 0 | 0 | 1 | 0 | 0 | 0 | 0 | 0 | 0 | 0 |
| <b>Sri-Lanka</b>                 | <b>207</b> | 162 | 0 | 0 | 0 | 0 | 0 | 0 | 0 | 0 | 0 | 0 | 0 | 0 | 0 |
| <b>France</b>                    | <b>57</b>  | 35  | 0 | 0 | 0 | 0 | 0 | 0 | 0 | 0 | 0 | 0 | 0 | 0 | 0 |
| <b>Northern Portugal</b>         | <b>60</b>  | 48  | 0 | 0 | 0 | 0 | 0 | 0 | 0 | 0 | 0 | 0 | 1 | 0 | 0 |
| <b>Southern Portugal</b>         | <b>78</b>  | 66  | 0 | 0 | 0 | 0 | 0 | 0 | 0 | 0 | 0 | 0 | 0 | 0 | 0 |
| <b>Eastern Andalusia</b>         | <b>95</b>  | 60  | 0 | 0 | 0 | 0 | 0 | 1 | 0 | 0 | 0 | 0 | 0 | 0 | 0 |
| <b>Galicia</b>                   | <b>89</b>  | 65  | 0 | 0 | 0 | 0 | 0 | 0 | 0 | 0 | 0 | 0 | 1 | 0 | 0 |
| <b>Spain - Northern Castilla</b> | <b>130</b> | 85  | 0 | 0 | 0 | 0 | 0 | 0 | 0 | 0 | 0 | 0 | 1 | 0 | 0 |
| <b>Portuguese Jew</b>            | <b>86</b>  | 49  | 0 | 0 | 0 | 0 | 0 | 1 | 0 | 1 | 0 | 1 | 0 | 0 | 0 |
| <b>Phillipines</b>               | <b>76</b>  | 64  | 0 | 0 | 0 | 0 | 0 | 0 | 0 | 0 | 0 | 0 | 0 | 0 | 0 |
| <b>Malay Singapore</b>           | <b>180</b> | 134 | 0 | 0 | 0 | 0 | 0 | 0 | 0 | 0 | 0 | 0 | 0 | 1 | 0 |
| <b>Malay Malaysia</b>            | <b>334</b> | 245 | 0 | 0 | 0 | 0 | 0 | 0 | 0 | 0 | 0 | 0 | 0 | 1 | 0 |
| <b>Iban</b>                      | <b>105</b> | 57  | 0 | 0 | 0 | 0 | 0 | 0 | 0 | 0 | 0 | 0 | 0 | 0 | 0 |
| <b>Bidayuh</b>                   | <b>113</b> | 45  | 0 | 0 | 0 | 0 | 0 | 0 | 0 | 0 | 0 | 0 | 0 | 0 | 0 |
| <b>Melanau</b>                   | <b>104</b> | 39  | 0 | 0 | 0 | 0 | 0 | 0 | 0 | 0 | 0 | 0 | 0 | 1 | 0 |
| <b>Timor</b>                     | <b>113</b> | 81  | 0 | 0 | 0 | 0 | 0 | 0 | 0 | 1 | 0 | 0 | 0 | 0 | 0 |
| <b>Flores</b>                    | <b>385</b> | 126 | 0 | 0 | 0 | 0 | 0 | 0 | 0 | 0 | 0 | 0 | 0 | 0 | 1 |
| <b>Lembata</b>                   | <b>89</b>  | 40  | 0 | 0 | 0 | 0 | 0 | 0 | 0 | 1 | 0 | 0 | 0 | 0 | 0 |
| <b>Sumba</b>                     | <b>349</b> | 73  | 0 | 0 | 0 | 0 | 1 | 0 | 0 | 1 | 0 | 0 | 0 | 0 | 0 |
| <b>Vietnam</b>                   | <b>113</b> | 84  | 0 | 0 | 0 | 0 | 0 | 0 | 1 | 0 | 0 | 0 | 0 | 1 | 0 |
| <b>Bali</b>                      | <b>632</b> | 171 | 0 | 0 | 0 | 0 | 0 | 0 | 0 | 0 | 0 | 0 | 0 | 1 | 0 |
| <b>Borneo</b>                    | <b>85</b>  | 35  | 0 | 0 | 0 | 0 | 0 | 0 | 0 | 0 | 0 | 0 | 0 | 1 | 0 |
| <b>Java</b>                      | <b>61</b>  | 37  | 0 | 0 | 0 | 0 | 0 | 0 | 0 | 0 | 0 | 0 | 0 | 1 | 0 |

---

|                        |           |    |   |   |   |   |   |   |   |   |   |   |   |   |
|------------------------|-----------|----|---|---|---|---|---|---|---|---|---|---|---|---|
| <b>Mentawai</b>        | <b>73</b> | 18 | 0 | 0 | 0 | 0 | 0 | 0 | 0 | 0 | 0 | 0 | 0 | 0 |
| <b>Nias</b>            | <b>60</b> | 15 | 0 | 0 | 0 | 0 | 0 | 0 | 0 | 0 | 0 | 0 | 0 | 0 |
| <b>Oceania various</b> | <b>66</b> | 40 | 0 | 0 | 0 | 0 | 0 | 0 | 0 | 0 | 0 | 0 | 0 | 0 |
| <b>Papouasie NG</b>    | <b>47</b> | 42 | 0 | 0 | 0 | 0 | 0 | 0 | 0 | 1 | 0 | 0 | 0 | 0 |
| <b>Tahiti</b>          | <b>24</b> | 14 | 0 | 0 | 0 | 0 | 0 | 0 | 0 | 0 | 0 | 0 | 0 | 0 |
| <b>Vanuatu</b>         | <b>44</b> | 32 | 0 | 0 | 0 | 0 | 0 | 0 | 0 | 0 | 0 | 0 | 0 | 0 |
| <b>Thailand</b>        | <b>41</b> | 39 | 0 | 0 | 0 | 0 | 0 | 0 | 0 | 0 | 0 | 0 | 0 | 0 |

---

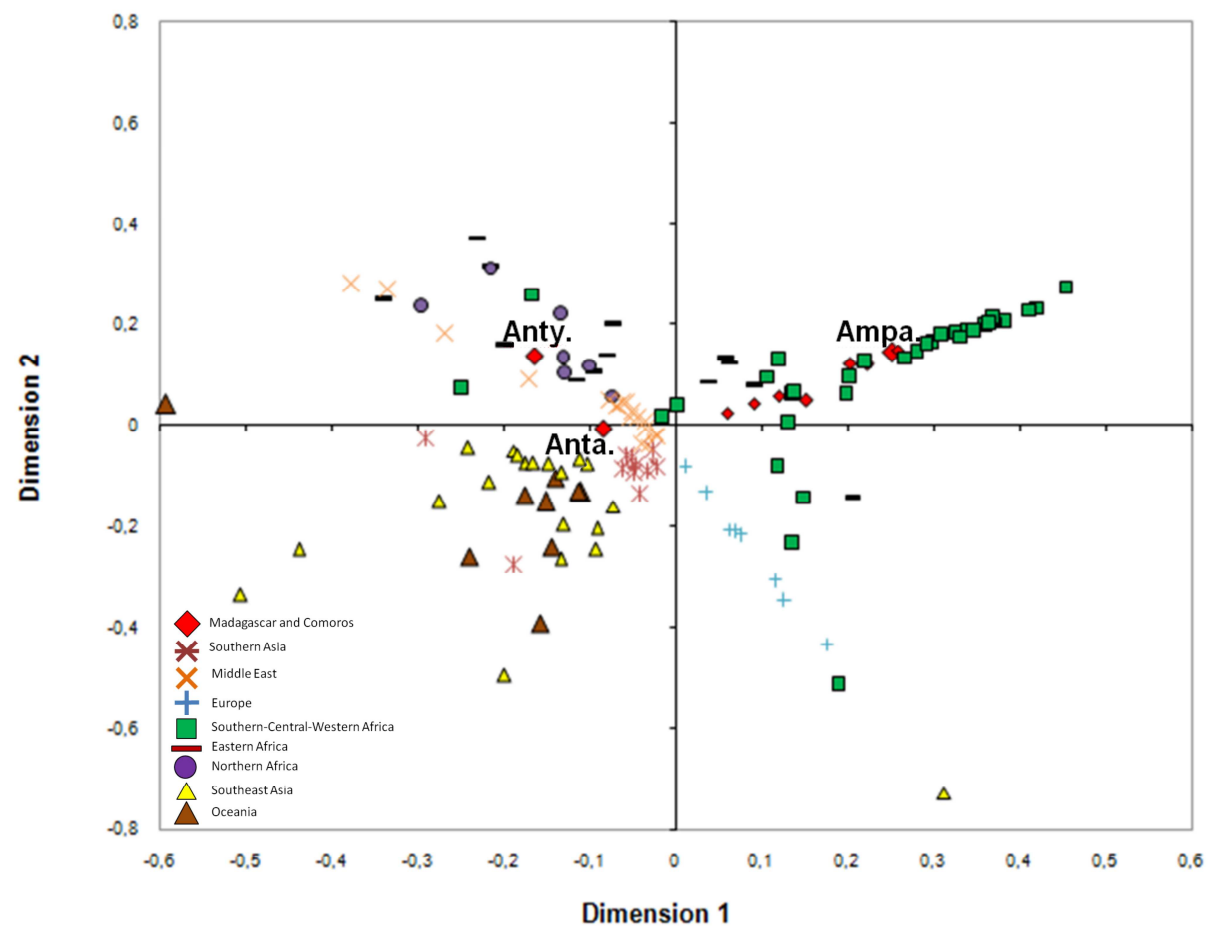

**Figure S2.** MDS plot of  $F_{ST}$  computed from Y haplogroup frequencies between the Antemoro and populations from various geographic regions (Kruskal stress =0.227). Anty: Anteony, Anta: Antalaotra, Ampa: Ampanabaka.

**Table S15.** Population pairwise  $F_{ST}$  values based on HVI in our three Antemoro groups

|                                 | <b>Ampanabaka</b> |                          | <b>Anteony</b> |                          | <b>Antalaotra</b> |                          |
|---------------------------------|-------------------|--------------------------|----------------|--------------------------|-------------------|--------------------------|
|                                 | $F_{ST}$          | Significativity seuil 5% | $F_{ST}$       | Significativity seuil 5% | $F_{ST}$          | Significativity seuil 5% |
| <b>Ampanabaka</b>               | *                 | *                        |                |                          |                   |                          |
| <b>Anteony</b>                  | 0.00308           | -                        | *              | *                        |                   |                          |
| <b>Antalaotra</b>               | -0.01249          | -                        | -0.00327       | -                        | *                 | *                        |
| <b>Highlands Madagascar</b>     | 0.02868           | +                        | 0.03267        | +                        | 0.02209           | -                        |
| <b>Antanosy</b>                 | -0.01371          | -                        | 0.01076        | -                        | -0.00457          | -                        |
| <b>Antandroy</b>                | 0.00390           | -                        | 0.01923        | +                        | 0.00963           | -                        |
| <b>Mikea</b>                    | 0.02314           | +                        | 0.01603        | +                        | 0.02761           | +                        |
| <b>Vezo - Northern Tulear</b>   | 0.02224           | +                        | 0.00432        | -                        | 0.01967           | +                        |
| <b>Vezo - Southern Tulear</b>   | -0.00476          | -                        | 0.03348        | +                        | 0.01146           | -                        |
| <b>Angola Nyaneka</b>           | 0.11328           | +                        | 0.07044        | +                        | 0.11840           | +                        |
| <b>Angola Ovimbudu</b>          | 0.09680           | +                        | 0.05456        | +                        | 0.10350           | +                        |
| <b>Fon Benin</b>                | 0.08136           | +                        | 0.04245        | +                        | 0.08817           | +                        |
| <b>Cabinda Angola</b>           | 0.09690           | +                        | 0.06021        | +                        | 0.09970           | +                        |
| <b>Cabo verde</b>               | 0.08850           | +                        | 0.05309        | +                        | 0.09153           | +                        |
| <b>Cameroon Ngumba</b>          | 0.16808           | +                        | 0.12283        | +                        | 0.17060           | +                        |
| <b>Cameroon Pygmies Baka</b>    | 0.55022           | +                        | 0.50240        | +                        | 0.55342           | +                        |
| <b>Cameroon Pygmies Bakola</b>  | 0.66479           | +                        | 0.62033        | +                        | 0.67106           | +                        |
| <b>Guanche Canaries Islands</b> | 0.15991           | +                        | 0.14576        | +                        | 0.14686           | +                        |
| <b>Egypt Arabs</b>              | 0.07063           | +                        | 0.05093        | +                        | 0.07356           | +                        |
| <b>Egypt Copts</b>              | 0.12162           | +                        | 0.11184        | +                        | 0.12323           | +                        |
| <b>Gabon Fang</b>               | 0.14899           | +                        | 0.09860        | +                        | 0.15394           | +                        |
| <b>Gabon Mitsogo</b>            | 0.09549           | +                        | 0.07485        | +                        | 0.09176           | +                        |
| <b>Gabon Nzebi</b>              | 0.12772           | +                        | 0.08721        | +                        | 0.12803           | +                        |
| <b>Guinea Bissau</b>            | 0.07790           | +                        | 0.04025        | +                        | 0.08038           | +                        |
| <b>Ivory coast Ahizi</b>        | 0.06229           | +                        | 0.03867        | +                        | 0.06321           | +                        |
| <b>Ivory coast Yacouba</b>      | 0.09363           | +                        | 0.04537        | +                        | 0.09984           | +                        |
| <b>Kenya Swahili</b>            | 0.05018           | +                        | 0.02810        | +                        | 0.05026           | +                        |
| <b>Mali Malinke</b>             | 0.09460           | +                        | 0.05130        | +                        | 0.09669           | +                        |
| <b>Moors Mauritania</b>         | 0.09725           | +                        | 0.06210        | +                        | 0.09169           | +                        |
| <b>Morocco Berbers</b>          | 0.09510           | +                        | 0.08424        | +                        | 0.08473           | +                        |
| <b>Mozambique</b>               | 0.11165           | +                        | 0.06931        | +                        | 0.12438           | +                        |
| <b>Rwanda Hutu</b>              | 0.09070           | +                        | 0.05299        | +                        | 0.09043           | +                        |
| <b>Sao Tome</b>                 | 0.10694           | +                        | 0.06191        | +                        | 0.11061           | +                        |
| <b>Senegal Mandenka</b>         | 0.12783           | +                        | 0.08691        | +                        | 0.12581           | +                        |
| <b>Senegal Wolof</b>            | 0.04823           | +                        | 0.02964        | +                        | 0.04262           | +                        |
| <b>South Africa Kung</b>        | 0.24827           | +                        | 0.21230        | +                        | 0.25302           | +                        |
| <b>Tanzania Hadza</b>           | 0.28846           | +                        | 0.21607        | +                        | 0.29385           | +                        |
| <b>Tanzania Sandawe</b>         | 0.20552           | +                        | 0.15476        | +                        | 0.20437           | +                        |
| <b>Zimbabwe</b>                 | 0.09277           | +                        | 0.05355        | +                        | 0.09439           | +                        |
| <b>Tunisia</b>                  | 0.06120           | +                        | 0.04887        | +                        | 0.05491           | +                        |
| <b>Algeria</b>                  | 0.08023           | +                        | 0.06749        | +                        | 0.07702           | +                        |

|                                 |         |   |         |   |         |   |
|---------------------------------|---------|---|---------|---|---------|---|
| <b>Sahawari</b>                 | 0.06787 | + | 0.04662 | + | 0.05815 | + |
| <b>Samaritans</b>               | 0.33822 | + | 0.32356 | + | 0.33873 | + |
| <b>Ethiopia Amharic Various</b> | 0.05723 | + | 0.03393 | + | 0.05769 | + |
| <b>Sudan Nubia</b>              | 0.06086 | + | 0.02963 | + | 0.06248 | + |
| <b>Tunisia Various</b>          | 0.10721 | + | 0.10270 | + | 0.10002 | + |
| <b>Morocco Berbers Bourhiah</b> | 0.09756 | + | 0.08690 | + | 0.08722 | + |
| <b>Morocco Berbers Figuig</b>   | 0.06247 | + | 0.04542 | + | 0.05800 | + |
| <b>Egypt Berbers Siwa</b>       | 0.10895 | + | 0.09627 | + | 0.10557 | + |
| <b>Libye Tuaregs</b>            | 0.12846 | + | 0.11908 | + | 0.12261 | + |
| <b>Ethiopia various</b>         | 0.09378 | + | 0.05562 | + | 0.09503 | + |
| <b>Thailand</b>                 | 0.08227 | + | 0.07177 | + | 0.08177 | + |
| <b>Vietnam</b>                  | 0.09358 | + | 0.08819 | + | 0.09253 | + |
| <b>Adonara</b>                  | 0.13116 | + | 0.12653 | + | 0.13945 | + |
| <b>Flores</b>                   | 0.08710 | + | 0.10163 | + | 0.09871 | + |
| <b>Banjamarsin</b>              | 0.02975 | + | 0.03884 | + | 0.02490 | + |
| <b>New Guinea Highlands</b>     | 0.25259 | + | 0.22107 | + | 0.23589 | + |
| <b>Solomon islands</b>          | 0.10630 | + | 0.12811 | + | 0.10710 | + |
| <b>Bali</b>                     | 0.06684 | + | 0.06423 | + | 0.06663 | + |
| <b>Sumatra Medan</b>            | 0.04542 | + | 0.04369 | + | 0.03906 | + |
| <b>Sumatra Pekanbaru</b>        | 0.10916 | + | 0.10420 | + | 0.09859 | + |
| <b>Manus Province</b>           | 0.09683 | + | 0.12830 | + | 0.10181 | + |
| <b>Nicobar</b>                  | 0.20554 | + | 0.18765 | + | 0.20302 | + |
| <b>Onges Nicobar</b>            | 0.32064 | + | 0.28845 | + | 0.31826 | + |
| <b>Phillipins</b>               | 0.05034 | + | 0.06103 | + | 0.04498 | + |
| <b>Iban</b>                     | 0.06033 | + | 0.07499 | + | 0.06550 | + |
| <b>Malay Kuala Lumpur</b>       | 0.04972 | + | 0.05190 | + | 0.04927 | + |
| <b>Malay Singapore</b>          | 0.04378 | + | 0.04690 | + | 0.04274 | + |
| <b>New Guinea Gidra</b>         | 0.23700 | + | 0.19917 | + | 0.22786 | + |
| <b>Bismark Archipelago</b>      | 0.09704 | + | 0.10592 | + | 0.09680 | + |
| <b>Vanuatu</b>                  | 0.20821 | + | 0.18571 | + | 0.19405 | + |
| <b>Socotra</b>                  | 0.17724 | + | 0.15978 | + | 0.16561 | + |
| <b>Iran</b>                     | 0.10943 | + | 0.10852 | + | 0.10039 | + |
| <b>Syria</b>                    | 0.12800 | + | 0.12024 | + | 0.11536 | + |
| <b>Yemen</b>                    | 0.05559 | + | 0.03587 | + | 0.04877 | + |
| <b>Israel</b>                   | 0.09226 | + | 0.08427 | + | 0.08405 | + |
| <b>Kurds</b>                    | 0.13986 | + | 0.13276 | + | 0.13012 | + |
| <b>Cyprus</b>                   | 0.12860 | + | 0.11876 | + | 0.11585 | + |
| <b>Irak</b>                     | 0.13200 | + | 0.12602 | + | 0.11922 | + |
| <b>Iranian</b>                  | 0.14142 | + | 0.14845 | + | 0.12968 | + |
| <b>Dubai</b>                    | 0.05482 | + | 0.05209 | + | 0.05009 | + |
| <b>Israel Druzes</b>            | 0.11304 | + | 0.11458 | + | 0.10255 | + |
| <b>Turkey various</b>           | 0.09878 | + | 0.10274 | + | 0.08912 | + |
| <b>Jordan</b>                   | 0.10029 | + | 0.09711 | + | 0.09070 | + |
| <b>Iran Kurds</b>               | 0.11875 | + | 0.11773 | + | 0.11330 | + |
| <b>Iran persian</b>             | 0.09001 | + | 0.09220 | + | 0.08300 | + |

|                          |         |   |         |   |         |   |
|--------------------------|---------|---|---------|---|---------|---|
| <b>Saudi Arabia</b>      | 0.09682 | + | 0.09747 | + | 0.08927 | + |
| <b>Bangladesh</b>        | 0.07566 | + | 0.06392 | + | 0.06978 | + |
| <b>Gujarat</b>           | 0.07272 | + | 0.07014 | + | 0.06688 | + |
| <b>India Kamataka</b>    | 0.09924 | + | 0.09787 | + | 0.09870 | + |
| <b>India Kerala</b>      | 0.09643 | + | 0.09415 | + | 0.08908 | + |
| <b>Madyah Pradesh</b>    | 0.07874 | + | 0.07195 | + | 0.07057 | + |
| <b>India Maharashtra</b> | 0.07309 | + | 0.06866 | + | 0.06764 | + |
| <b>India Orissa</b>      | 0.06453 | + | 0.06705 | + | 0.06019 | + |
| <b>Punjab</b>            | 0.08482 | + | 0.08768 | + | 0.07957 | + |
| <b>Tamil Nadu</b>        | 0.07087 | + | 0.07347 | + | 0.06917 | + |
| <b>India Tripura</b>     | 0.06450 | + | 0.05639 | + | 0.06377 | + |
| <b>Uttard Pradesh</b>    | 0.08493 | + | 0.08333 | + | 0.07997 | + |
| <b>Western Bengal</b>    | 0.06903 | + | 0.06565 | + | 0.06733 | + |
| <b>Sri Lanka</b>         | 0.06777 | + | 0.06561 | + | 0.06261 | + |
| <b>Hindus India</b>      | 0.07336 | + | 0.06996 | + | 0.06934 | + |
| <b>Sicily</b>            | 0.13612 | + | 0.13838 | + | 0.12421 | + |
| <b>Galicia</b>           | 0.18710 | + | 0.18053 | + | 0.17246 | + |
| <b>Catalan</b>           | 0.13107 | + | 0.12519 | + | 0.12026 | + |
| <b>Andalusia</b>         | 0.14915 | + | 0.14781 | + | 0.13732 | + |
| <b>Portuguese</b>        | 0.15341 | + | 0.14304 | + | 0.14158 | + |
| <b>Corsica</b>           | 0.13907 | + | 0.13813 | + | 0.12944 | + |
| <b>France</b>            | 0.16960 | + | 0.16472 | + | 0.15596 | + |
| <b>England</b>           | 0.15254 | + | 0.14757 | + | 0.14054 | + |
| <b>Greece</b>            | 0.15678 | + | 0.15814 | + | 0.14518 | + |

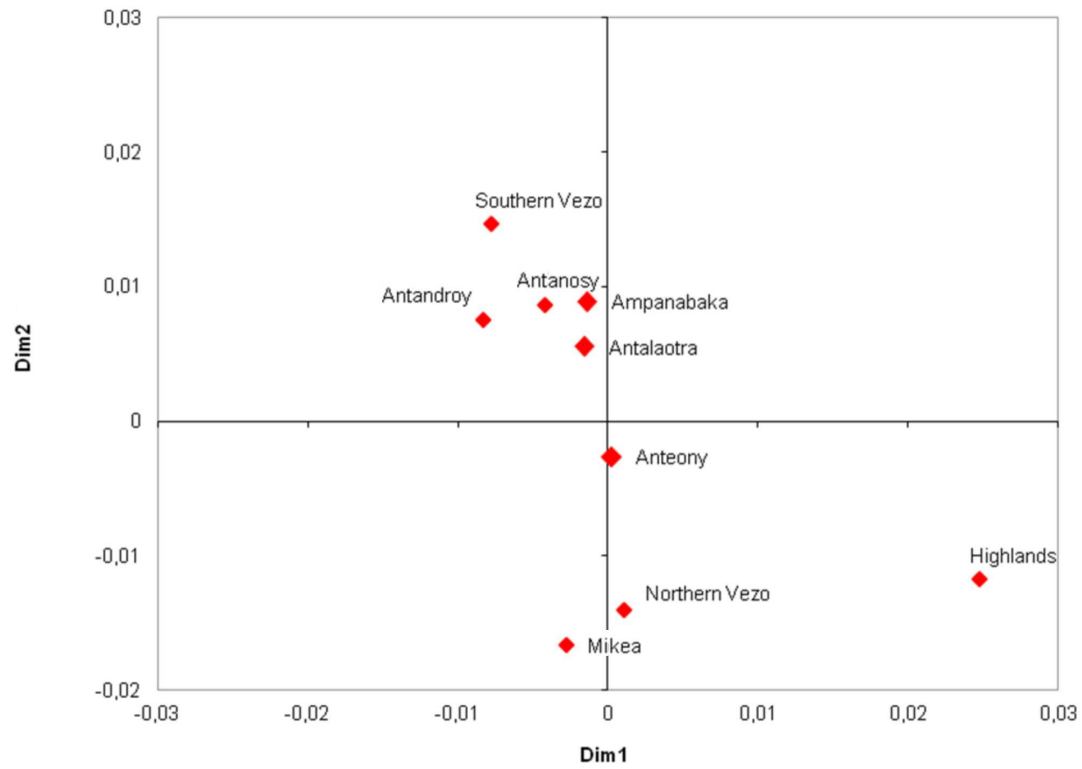

**Figure S3.** MDS plot computed from  $F_{ST}$  values between Malagasy populations, based on HVI data.

Lower diagonal:  $F_{ST}$ ; upper diagonal: p-values. (+) p-value significant at 1% ; (-) p-values non-significant at 1%. Kruskal stress = 0.329.

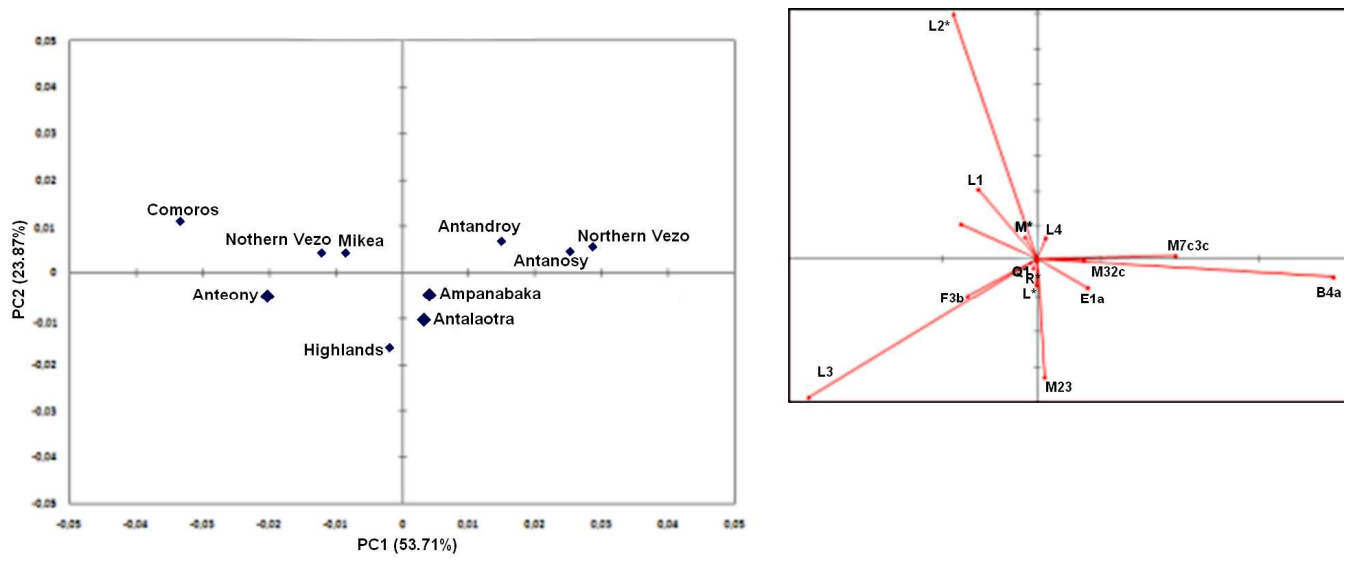

**Figure S4.** PCA computed from mitochondrial haplogroups frequency in Malagasy and Comoros populations. The insert showed the contribution of haplogroups to the two components.



**Table S16.** Shared HVI haplotypes between the Ampanabaka and the other Malagasy populations.

|               | Ampanabaka | Andriana  | Antaisaka | Highlands | Antanosy  | Antandroy | Mikea      | Vezo -<br>Northern | Vezo -<br>Southern |
|---------------|------------|-----------|-----------|-----------|-----------|-----------|------------|--------------------|--------------------|
| <b>n ind.</b> | <b>48</b>  | <b>32</b> | <b>11</b> | <b>52</b> | <b>54</b> | <b>59</b> | <b>127</b> | <b>52</b>          | <b>49</b>          |
| <b>n hap.</b> | <b>20</b>  | <b>7</b>  | <b>8</b>  | <b>21</b> | <b>25</b> | <b>23</b> | <b>28</b>  | <b>18</b>          | <b>20</b>          |
| Hap.01        | 1          | 0         | 0         | 0         | 0         | 1         | 1          | 0                  | 0                  |
| Hap.02        | 1          | 0         | 0         | 0         | 1         | 2         | 0          | 0                  | 0                  |
| Hap.03        | 4          | 0         | 1         | 2         | 8         | 4         | 6          | 2                  | 6                  |
| Hap.04        | 4          | 9         | 0         | 3         | 3         | 2         | 18         | 6                  | 0                  |
| Hap.05        | 1          | 0         | 1         | 0         | 0         | 0         | 0          | 0                  | 0                  |
| Hap.06        | 4          | 0         | 0         | 1         | 0         | 0         | 0          | 0                  | 1                  |
| Hap.07        | 2          | 0         | 1         | 0         | 1         | 1         | 0          | 0                  | 0                  |
| Hap.08        | 1          | 0         | 0         | 0         | 0         | 0         | 0          | 0                  | 0                  |
| Hap.09        | 3          | 0         | 3         | 0         | 2         | 0         | 0          | 0                  | 0                  |
| Hap.10        | 11         | 16        | 2         | 4         | 11        | 16        | 17         | 4                  | 15                 |
| Hap.11        | 1          | 0         | 0         | 0         | 0         | 0         | 0          | 0                  | 0                  |
| Hap.12        | 2          | 0         | 0         | 8         | 2         | 4         | 10         | 2                  | 1                  |
| Hap.13        | 2          | 0         | 0         | 1         | 1         | 2         | 14         | 6                  | 7                  |
| Hap.14        | 1          | 0         | 0         | 0         | 0         | 0         | 1          | 0                  | 0                  |
| Hap.15        | 1          | 0         | 0         | 0         | 0         | 0         | 0          | 1                  | 0                  |
| Hap.16        | 2          | 3         | 1         | 0         | 3         | 1         | 12         | 1                  | 4                  |
| Hap.17        | 2          | 0         | 0         | 2         | 0         | 0         | 1          | 4                  | 0                  |
| Hap.18        | 3          | 0         | 0         | 0         | 2         | 2         | 5          | 5                  | 1                  |
| Hap.19        | 1          | 0         | 0         | 0         | 0         | 1         | 0          | 0                  | 0                  |
| Hap.20        | 1          | 0         | 0         | 0         | 0         | 0         | 0          | 0                  | 0                  |

**Table S17.** Shared HVI haplotypes between the Antalaotra and other Malagasy populations

|               | Antalaotra | Andriana  | Antaisaka | Highlands | Antanosy  | Antandroy | Mikea      | Vezo -<br>Northern | Vezo -<br>Southern |
|---------------|------------|-----------|-----------|-----------|-----------|-----------|------------|--------------------|--------------------|
| <b>n ind.</b> | <b>40</b>  | <b>32</b> | <b>11</b> | <b>52</b> | <b>54</b> | <b>59</b> | <b>127</b> | <b>52</b>          | <b>49</b>          |
| <b>n hap.</b> | <b>27</b>  | <b>7</b>  | <b>8</b>  | <b>21</b> | <b>25</b> | <b>23</b> | <b>28</b>  | <b>18</b>          | <b>20</b>          |
| Hap.01        | 1          | 0         | 1         | 2         | 8         | 4         | 6          | 2                  | 6                  |
| Hap.02        | 5          | 9         | 0         | 3         | 3         | 2         | 18         | 6                  | 0                  |
| Hap.03        | 2          | 0         | 0         | 1         | 0         | 0         | 0          | 0                  | 1                  |
| Hap.04        | 2          | 0         | 3         | 0         | 2         | 0         | 0          | 0                  | 0                  |
| Hap.05        | 8          | 16        | 2         | 4         | 11        | 16        | 17         | 4                  | 15                 |
| Hap.06        | 5          | 0         | 0         | 8         | 2         | 4         | 10         | 2                  | 1                  |
| Hap.07        | 2          | 0         | 0         | 1         | 1         | 2         | 14         | 6                  | 7                  |
| Hap.08        | 1          | 3         | 1         | 0         | 3         | 1         | 12         | 1                  | 4                  |
| Hap.09        | 3          | 0         | 0         | 0         | 2         | 2         | 5          | 5                  | 1                  |
| Hap.10        | 1          | 0         | 0         | 0         | 0         | 0         | 0          | 0                  | 0                  |
| Hap.11        | 2          | 1         | 0         | 1         | 2         | 7         | 3          | 3                  | 1                  |
| Hap.12        | 2          | 0         | 0         | 0         | 0         | 0         | 0          | 0                  | 0                  |
| Hap.13        | 1          | 0         | 0         | 0         | 0         | 0         | 0          | 0                  | 0                  |
| Hap.14        | 1          | 0         | 0         | 0         | 0         | 0         | 0          | 0                  | 0                  |
| Hap.15        | 1          | 0         | 0         | 0         | 4         | 0         | 0          | 2                  | 1                  |
| Hap.16        | 2          | 0         | 0         | 0         | 0         | 0         | 0          | 0                  | 0                  |
| Hap.17        | 1          | 0         | 0         | 0         | 0         | 0         | 0          | 0                  | 0                  |

**Table S18.** Shared HVI haplotypes between the Anteony and other Malagasy populations.

|               | Anteony   | Andriana  | Antaisaka | Highlands | Antanosy  | Antandroy | Mikea      | Vezo -<br>Northern | Vezo -<br>Southern |
|---------------|-----------|-----------|-----------|-----------|-----------|-----------|------------|--------------------|--------------------|
| <b>n ind.</b> | <b>47</b> | <b>32</b> | <b>11</b> | <b>52</b> | <b>54</b> | <b>59</b> | <b>127</b> | <b>52</b>          | <b>49</b>          |
| <b>n hap.</b> | <b>17</b> | <b>7</b>  | <b>8</b>  | <b>21</b> | <b>25</b> | <b>23</b> | <b>28</b>  | <b>18</b>          | <b>20</b>          |
| Hap.01        | 1         | 0         | 0         | 0         | 0         | 1         | 1          | 0                  | 0                  |
| Hap.02        | 1         | 0         | 0         | 0         | 1         | 2         | 0          | 0                  | 0                  |
| Hap.03        | 1         | 0         | 1         | 2         | 8         | 4         | 6          | 2                  | 6                  |
| Hap.04        | 3         | 9         | 0         | 3         | 3         | 2         | 18         | 6                  | 0                  |
| Hap.05        | 1         | 0         | 1         | 0         | 1         | 1         | 0          | 0                  | 0                  |
| Hap.06        | 1         | 0         | 3         | 0         | 2         | 0         | 0          | 0                  | 0                  |
| Hap.07        | 2         | 16        | 2         | 4         | 11        | 16        | 17         | 4                  | 15                 |
| Hap.08        | 3         | 0         | 0         | 8         | 2         | 4         | 10         | 2                  | 1                  |
| Hap.09        | 4         | 0         | 0         | 1         | 1         | 2         | 14         | 6                  | 7                  |
| Hap.10        | 1         | 0         | 0         | 2         | 0         | 0         | 1          | 4                  | 0                  |
| Hap.11        | 6         | 0         | 0         | 0         | 2         | 2         | 5          | 5                  | 1                  |
| Hap.12        | 1         | 0         | 0         | 0         | 0         | 1         | 0          | 0                  | 0                  |
| Hap.13        | 1         | 0         | 0         | 0         | 0         | 0         | 0          | 0                  | 0                  |
| Hap.14        | 3         | 0         | 0         | 0         | 0         | 0         | 0          | 0                  | 0                  |
| Hap.15        | 1         | 0         | 0         | 0         | 1         | 0         | 5          | 0                  | 0                  |
| Hap.16        | 3         | 0         | 0         | 0         | 0         | 0         | 0          | 0                  | 0                  |
| Hap.17        | 3         | 1         | 0         | 2         | 2         | 0         | 0          | 0                  | 1                  |
| Hap.18        | 1         | 0         | 0         | 0         | 0         | 0         | 0          | 0                  | 0                  |
| Hap.19        | 1         | 0         | 0         | 0         | 0         | 0         | 0          | 0                  | 0                  |
| Hap.20        | 1         | 0         | 0         | 0         | 1         | 0         | 0          | 0                  | 0                  |
| Hap.21        | 2         | 0         | 0         | 0         | 0         | 0         | 0          | 0                  | 1                  |
| Hap.22        | 1         | 1         | 0         | 1         | 2         | 7         | 3          | 3                  | 1                  |
| Hap.23        | 1         | 0         | 0         | 0         | 0         | 0         | 0          | 0                  | 0                  |
| Hap.24        | 1         | 0         | 0         | 0         | 0         | 0         | 0          | 0                  | 0                  |
| Hap.25        | 1         | 0         | 0         | 0         | 0         | 0         | 0          | 0                  | 0                  |
| Hap.26        | 1         | 0         | 0         | 0         | 0         | 0         | 0          | 0                  | 0                  |
| Hap.27        | 1         | 0         | 0         | 0         | 0         | 0         | 2          | 0                  | 1                  |

**Table S19.** Shared HVI unique haplotypes between the Ampanabaka and populations from the database

|                          | Number of individuals | Number of haplotypes |        |        |        |        |        |        |        |        |        |         |         |        |        |        |        |        |        |        |        |       |
|--------------------------|-----------------------|----------------------|--------|--------|--------|--------|--------|--------|--------|--------|--------|---------|---------|--------|--------|--------|--------|--------|--------|--------|--------|-------|
|                          |                       | hap.01               | hap.02 | hap.03 | hap.04 | hap.05 | hap.06 | hap.07 | hap.08 | hap.09 | hap.10 | hap.11  | hap.12  | hap.13 | hap.14 | hap.15 | hap.16 | hap.17 | hap.18 | hap.19 | hap.20 |       |
| Angola Nyaneka           | 147                   | 70                   | L3d    | L2a1   | M7c3c  | L3b    | L3b    | L3c3   | L3e2b3 | M32c   | L0a2   | B4a1a1a | B4a1a1a | M23    | L2a1   | L3b    | L2a1   | E1a1   | L3e1a  | F3b    | L2a1   | M7c3c |
| Angola Ovimbudu          | 98                    | 60                   | 1      | 0      | 0      | 0      | 0      | 1      | 0      | 0      | 1      | 0       | 0       | 0      | 1      | 0      | 0      | 0      | 1      | 0      | 0      | 0     |
| Fon Benin                | 171                   | 104                  | 1      | 0      | 0      | 0      | 0      | 0      | 0      | 0      | 0      | 0       | 0       | 0      | 0      | 0      | 1      | 0      | 0      | 0      | 0      | 0     |
| Cabinda Angola           | 110                   | 69                   | 0      | 0      | 0      | 0      | 0      | 1      | 0      | 0      | 1      | 0       | 0       | 0      | 0      | 0      | 0      | 0      | 1      | 0      | 0      | 0     |
| Cabo verde               | 292                   | 118                  | 0      | 0      | 0      | 0      | 0      | 0      | 0      | 0      | 1      | 0       | 0       | 0      | 0      | 1      | 0      | 0      | 0      | 0      | 0      | 0     |
| Cameroon Ngumba          | 88                    | 43                   | 0      | 0      | 0      | 0      | 0      | 0      | 0      | 0      | 0      | 0       | 0       | 0      | 0      | 1      | 0      | 0      | 0      | 0      | 0      | 0     |
| Cameroon Pygmies Baka    | 87                    | 13                   | 0      | 0      | 0      | 0      | 0      | 0      | 0      | 0      | 0      | 0       | 0       | 0      | 0      | 0      | 0      | 0      | 0      | 0      | 0      | 0     |
| Cameroon Pygmies Baloka  | 88                    | 5                    | 0      | 0      | 0      | 0      | 0      | 0      | 0      | 0      | 0      | 0       | 0       | 0      | 0      | 0      | 0      | 0      | 0      | 0      | 0      | 0     |
| Guanche Canaries Islands | 71                    | 32                   | 0      | 0      | 0      | 0      | 0      | 0      | 0      | 0      | 0      | 0       | 0       | 0      | 0      | 0      | 0      | 0      | 0      | 0      | 0      | 0     |
| Egypt Arabs              | 102                   | 44                   | 0      | 0      | 0      | 0      | 0      | 0      | 0      | 0      | 0      | 0       | 0       | 0      | 0      | 0      | 0      | 0      | 0      | 0      | 0      | 0     |
| Egypt Copt               | 100                   | 30                   | 0      | 0      | 0      | 0      | 0      | 0      | 0      | 0      | 0      | 0       | 0       | 0      | 0      | 0      | 0      | 0      | 0      | 0      | 0      | 0     |
| Gabon Fong               | 66                    | 35                   | 0      | 0      | 0      | 0      | 0      | 0      | 0      | 0      | 0      | 0       | 0       | 0      | 0      | 0      | 0      | 0      | 1      | 0      | 0      | 0     |
| Gabon Mitsogo            | 64                    | 33                   | 0      | 0      | 0      | 0      | 0      | 0      | 0      | 0      | 0      | 0       | 0       | 0      | 0      | 0      | 0      | 0      | 0      | 0      | 0      | 0     |
| Gabon Nzebi              | 63                    | 42                   | 1      | 0      | 0      | 0      | 0      | 0      | 0      | 0      | 0      | 0       | 0       | 0      | 0      | 0      | 0      | 0      | 1      | 0      | 0      | 0     |
| Guinea Bissau            | 372                   | 176                  | 1      | 0      | 0      | 1      | 0      | 0      | 0      | 0      | 0      | 0       | 0       | 0      | 0      | 1      | 0      | 0      | 0      | 0      | 0      | 0     |
| Ivory coast Ahizi        | 129                   | 54                   | 0      | 0      | 0      | 0      | 0      | 0      | 0      | 0      | 0      | 0       | 0       | 0      | 0      | 1      | 0      | 0      | 0      | 0      | 0      | 0     |
| Ivory coast Yacouba      | 61                    | 41                   | 0      | 0      | 0      | 0      | 0      | 0      | 0      | 0      | 0      | 0       | 0       | 0      | 0      | 0      | 0      | 0      | 0      | 0      | 0      | 0     |
| Kenya swahili            | 200                   | 117                  | 0      | 0      | 0      | 0      | 0      | 1      | 0      | 0      | 1      | 0       | 0       | 0      | 0      | 1      | 0      | 0      | 0      | 0      | 0      | 0     |
| Mali Malinke             | 60                    | 48                   | 0      | 0      | 0      | 0      | 0      | 0      | 0      | 0      | 0      | 0       | 0       | 0      | 0      | 0      | 0      | 0      | 0      | 0      | 0      | 0     |
| Moors Mauritania         | 64                    | 107                  | 0      | 0      | 0      | 0      | 0      | 0      | 0      | 0      | 0      | 0       | 0       | 0      | 0      | 1      | 0      | 0      | 0      | 0      | 0      | 0     |
| Morocco Berbers          | 181                   | 107                  | 0      | 0      | 0      | 0      | 1      | 0      | 0      | 0      | 0      | 0       | 0       | 0      | 0      | 0      | 0      | 0      | 0      | 0      | 0      | 0     |
| Mozambique               | 416                   | 135                  | 1      | 0      | 0      | 0      | 0      | 1      | 0      | 0      | 1      | 0       | 0       | 1      | 0      | 1      | 0      | 1      | 0      | 1      | 0      | 0     |
| Rwanda Hutu              | 106                   | 58                   | 1      | 0      | 0      | 0      | 0      | 0      | 0      | 0      | 0      | 0       | 0       | 0      | 0      | 1      | 0      | 0      | 0      | 0      | 0      | 0     |
| Sao Tome                 | 103                   | 61                   | 0      | 0      | 0      | 0      | 0      | 0      | 0      | 0      | 0      | 0       | 0       | 0      | 0      | 0      | 0      | 0      | 0      | 0      | 0      | 0     |
| Senegal Mendenka         | 119                   | 50                   | 0      | 0      | 0      | 0      | 0      | 0      | 0      | 0      | 0      | 0       | 0       | 0      | 0      | 0      | 0      | 0      | 0      | 0      | 0      | 0     |
| Senegal Wolof            | 91                    | 76                   | 0      | 0      | 0      | 0      | 0      | 0      | 0      | 0      | 0      | 0       | 0       | 0      | 0      | 1      | 0      | 0      | 0      | 0      | 0      | 0     |

|                                 |            |            |   |   |   |   |   |   |   |   |   |   |   |   |   |   |   |   |   |   |   |
|---------------------------------|------------|------------|---|---|---|---|---|---|---|---|---|---|---|---|---|---|---|---|---|---|---|
| <b>South Africa Kung</b>        | <b>59</b>  | <b>14</b>  | 0 | 0 | 0 | 0 | 0 | 0 | 0 | 0 | 0 | 0 | 0 | 0 | 0 | 0 | 0 | 0 | 0 | 0 | 0 |
| <b>Tanzania Hadza</b>           | <b>79</b>  | <b>26</b>  | 0 | 0 | 0 | 0 | 1 | 0 | 0 | 0 | 0 | 0 | 0 | 0 | 0 | 1 | 0 | 0 | 0 | 0 | 0 |
| <b>Tanzania Sandawe</b>         | <b>82</b>  | <b>28</b>  | 0 | 0 | 0 | 0 | 0 | 0 | 0 | 0 | 0 | 0 | 0 | 0 | 0 | 0 | 0 | 0 | 0 | 0 | 0 |
| <b>Zimbabwe</b>                 | <b>58</b>  | <b>38</b>  | 1 | 0 | 0 | 0 | 0 | 0 | 0 | 1 | 0 | 0 | 0 | 1 | 0 | 1 | 0 | 0 | 0 | 0 | 0 |
| <b>Tunisia</b>                  | <b>47</b>  | <b>42</b>  | 0 | 0 | 0 | 0 | 0 | 0 | 0 | 0 | 0 | 0 | 0 | 0 | 0 | 0 | 0 | 0 | 0 | 0 | 0 |
| <b>Algeria</b>                  | <b>47</b>  | <b>26</b>  | 0 | 0 | 0 | 0 | 0 | 0 | 0 | 0 | 0 | 0 | 0 | 0 | 0 | 0 | 0 | 0 | 0 | 0 | 0 |
| <b>Sahawari</b>                 | <b>56</b>  | <b>41</b>  | 0 | 0 | 0 | 0 | 0 | 0 | 0 | 0 | 0 | 0 | 0 | 0 | 0 | 0 | 0 | 0 | 0 | 0 | 0 |
| <b>Samar Tunisia</b>            | <b>124</b> | <b>6</b>   | 0 | 0 | 0 | 0 | 0 | 0 | 0 | 0 | 0 | 0 | 0 | 0 | 0 | 0 | 0 | 0 | 0 | 0 | 0 |
| <b>Ethiopia Amharic</b>         | <b>270</b> | <b>139</b> | 1 | 0 | 0 | 0 | 0 | 0 | 0 | 0 | 0 | 0 | 0 | 0 | 1 | 0 | 0 | 0 | 0 | 0 | 0 |
| <b>Sudan-Nubia</b>              | <b>161</b> | <b>106</b> | 0 | 0 | 0 | 0 | 0 | 0 | 0 | 0 | 0 | 0 | 0 | 0 | 1 | 0 | 0 | 0 | 0 | 0 | 0 |
| <b>Tunisia various</b>          | <b>102</b> | <b>45</b>  | 0 | 0 | 0 | 0 | 0 | 0 | 0 | 0 | 0 | 0 | 0 | 0 | 0 | 0 | 0 | 0 | 0 | 0 | 0 |
| <b>Morocco Berbers Bourhiah</b> | <b>70</b>  | <b>35</b>  | 0 | 0 | 0 | 0 | 0 | 0 | 0 | 0 | 0 | 0 | 0 | 0 | 0 | 0 | 0 | 0 | 0 | 0 | 0 |
| <b>Morocco Berbers Figuig</b>   | <b>94</b>  | <b>28</b>  | 0 | 0 | 0 | 0 | 0 | 0 | 0 | 0 | 0 | 0 | 0 | 0 | 0 | 0 | 0 | 0 | 0 | 0 | 0 |
| <b>Egypt Berbers Siwa</b>       | <b>78</b>  | <b>22</b>  | 0 | 0 | 0 | 0 | 0 | 0 | 0 | 0 | 0 | 0 | 0 | 0 | 0 | 0 | 1 | 0 | 0 | 0 | 0 |
| <b>Lybia various</b>            | <b>129</b> | <b>16</b>  | 0 | 0 | 0 | 0 | 0 | 0 | 0 | 0 | 0 | 0 | 0 | 0 | 0 | 0 | 0 | 0 | 0 | 0 | 0 |
| <b>Ethiopia various</b>         | <b>116</b> | <b>71</b>  | 1 | 0 | 0 | 0 | 0 | 0 | 0 | 1 | 0 | 0 | 0 | 0 | 0 | 0 | 0 | 0 | 0 | 0 | 0 |
| <b>Thailand various</b>         | <b>71</b>  | <b>61</b>  | 0 | 0 | 0 | 0 | 0 | 0 | 0 | 0 | 0 | 0 | 0 | 0 | 0 | 0 | 0 | 0 | 0 | 0 | 0 |
| <b>Vietnam</b>                  | <b>65</b>  | <b>50</b>  | 0 | 0 | 0 | 0 | 0 | 0 | 0 | 0 | 0 | 0 | 0 | 0 | 0 | 0 | 0 | 0 | 0 | 0 | 0 |
| <b>Adonara</b>                  | <b>73</b>  | <b>30</b>  | 0 | 0 | 0 | 0 | 0 | 0 | 0 | 0 | 0 | 0 | 0 | 0 | 0 | 0 | 0 | 0 | 0 | 0 | 0 |
| <b>Flores</b>                   | <b>73</b>  | <b>37</b>  | 0 | 0 | 0 | 0 | 0 | 0 | 0 | 1 | 0 | 0 | 0 | 0 | 0 | 0 | 0 | 0 | 0 | 0 | 0 |
| <b>Banjamarsin</b>              | <b>110</b> | <b>80</b>  | 0 | 0 | 1 | 0 | 0 | 0 | 0 | 0 | 1 | 0 | 0 | 0 | 0 | 0 | 0 | 0 | 0 | 0 | 0 |
| <b>New Guinea Highlands</b>     | <b>71</b>  | <b>26</b>  | 0 | 0 | 0 | 0 | 0 | 0 | 0 | 0 | 0 | 0 | 0 | 0 | 0 | 0 | 0 | 0 | 0 | 0 | 0 |
| <b>Solomon islands</b>          | <b>64</b>  | <b>14</b>  | 0 | 0 | 0 | 0 | 0 | 0 | 0 | 1 | 0 | 0 | 0 | 0 | 0 | 0 | 0 | 0 | 0 | 0 | 0 |
| <b>Bali</b>                     | <b>64</b>  | <b>52</b>  | 0 | 0 | 1 | 0 | 0 | 0 | 0 | 0 | 0 | 0 | 0 | 0 | 0 | 0 | 0 | 0 | 0 | 0 | 0 |
| <b>Sumatra Medan</b>            | <b>42</b>  | <b>29</b>  | 0 | 0 | 1 | 0 | 0 | 0 | 0 | 0 | 0 | 0 | 0 | 0 | 0 | 0 | 0 | 0 | 0 | 0 | 0 |
| <b>Sumatra Pekanbaru</b>        | <b>54</b>  | <b>34</b>  | 0 | 0 | 1 | 0 | 0 | 0 | 0 | 0 | 0 | 0 | 0 | 0 | 0 | 0 | 0 | 0 | 0 | 0 | 0 |
| <b>Manus Province</b>           | <b>144</b> | <b>35</b>  | 0 | 0 | 1 | 0 | 0 | 0 | 0 | 0 | 1 | 0 | 0 | 0 | 0 | 0 | 0 | 0 | 0 | 0 | 0 |
| <b>Nicobar</b>                  | <b>46</b>  | <b>22</b>  | 0 | 0 | 0 | 0 | 0 | 0 | 0 | 0 | 0 | 0 | 0 | 0 | 0 | 0 | 0 | 0 | 0 | 0 | 0 |
| <b>Onges Nicobar</b>            | <b>63</b>  | <b>6</b>   | 0 | 0 | 0 | 0 | 0 | 0 | 0 | 0 | 0 | 0 | 0 | 0 | 0 | 0 | 0 | 0 | 0 | 0 | 0 |
| <b>Philippins</b>               | <b>144</b> | <b>70</b>  | 0 | 0 | 1 | 0 | 0 | 0 | 0 | 0 | 0 | 0 | 0 | 0 | 0 | 0 | 0 | 0 | 1 | 0 | 0 |
| <b>Iban</b>                     | <b>83</b>  | <b>30</b>  | 0 | 0 | 0 | 0 | 0 | 0 | 0 | 0 | 0 | 0 | 0 | 0 | 0 | 0 | 0 | 0 | 0 | 0 | 0 |
| <b>Malay Kuala-Lumpur</b>       | <b>124</b> | <b>90</b>  | 0 | 0 | 1 | 0 | 0 | 0 | 0 | 0 | 0 | 0 | 0 | 0 | 0 | 0 | 0 | 0 | 0 | 0 | 0 |
| <b>Malay Singapore</b>          | <b>205</b> | <b>132</b> | 0 | 0 | 1 | 0 | 0 | 0 | 0 | 0 | 0 | 0 | 0 | 0 | 0 | 0 | 0 | 0 | 0 | 0 | 0 |

|                            |            |            |   |   |   |   |   |   |   |   |   |   |   |   |   |   |   |   |   |   |   |
|----------------------------|------------|------------|---|---|---|---|---|---|---|---|---|---|---|---|---|---|---|---|---|---|---|
| <b>New Guinea Gidra</b>    | <b>59</b>  | <b>20</b>  | 0 | 0 | 0 | 0 | 0 | 0 | 0 | 0 | 0 | 0 | 0 | 0 | 0 | 0 | 0 | 0 | 0 | 0 | 0 |
| <b>Bismark Archipelago</b> | <b>47</b>  | <b>21</b>  | 0 | 0 | 0 | 0 | 0 | 0 | 0 | 0 | 0 | 1 | 0 | 0 | 0 | 0 | 0 | 0 | 0 | 0 | 0 |
| <b>Vanuatu</b>             | <b>42</b>  | <b>11</b>  | 0 | 0 | 0 | 0 | 0 | 0 | 0 | 0 | 0 | 1 | 0 | 0 | 0 | 0 | 0 | 0 | 0 | 0 | 0 |
| <b>Socotra</b>             | <b>65</b>  | <b>17</b>  | 0 | 0 | 0 | 0 | 0 | 0 | 0 | 0 | 0 | 0 | 0 | 0 | 0 | 0 | 0 | 0 | 0 | 0 | 0 |
| <b>Iran</b>                | <b>146</b> | <b>113</b> | 0 | 0 | 0 | 0 | 0 | 0 | 0 | 0 | 0 | 0 | 0 | 0 | 0 | 0 | 0 | 0 | 0 | 0 | 0 |
| <b>Syria</b>               | <b>49</b>  | <b>46</b>  | 0 | 0 | 0 | 0 | 0 | 0 | 0 | 0 | 0 | 0 | 0 | 0 | 0 | 0 | 0 | 0 | 0 | 0 | 0 |
| <b>Yemen</b>               | <b>115</b> | <b>67</b>  | 1 | 0 | 0 | 0 | 0 | 1 | 0 | 0 | 1 | 0 | 0 | 0 | 0 | 0 | 0 | 0 | 0 | 0 | 0 |
| <b>Israel</b>              | <b>45</b>  | <b>25</b>  | 0 | 0 | 0 | 0 | 0 | 0 | 0 | 0 | 0 | 0 | 0 | 0 | 0 | 0 | 0 | 0 | 0 | 0 | 0 |
| <b>Kurds</b>               | <b>78</b>  | <b>57</b>  | 0 | 0 | 0 | 0 | 0 | 0 | 0 | 0 | 0 | 0 | 0 | 0 | 0 | 0 | 0 | 0 | 0 | 0 | 0 |
| <b>Cyprus</b>              | <b>91</b>  | <b>59</b>  | 0 | 0 | 0 | 0 | 0 | 0 | 0 | 0 | 0 | 0 | 0 | 0 | 0 | 0 | 0 | 0 | 0 | 0 | 0 |
| <b>Irak</b>                | <b>52</b>  | <b>52</b>  | 0 | 0 | 0 | 0 | 0 | 0 | 0 | 0 | 0 | 0 | 0 | 0 | 0 | 0 | 0 | 0 | 0 | 0 | 0 |
| <b>Iranians</b>            | <b>731</b> | <b>394</b> | 0 | 0 | 0 | 0 | 0 | 0 | 0 | 0 | 0 | 0 | 0 | 0 | 0 | 0 | 0 | 0 | 0 | 0 | 0 |
| <b>Dubai</b>               | <b>249</b> | <b>154</b> | 1 | 0 | 0 | 0 | 0 | 1 | 0 | 0 | 1 | 0 | 0 | 1 | 1 | 0 | 0 | 0 | 0 | 0 | 0 |
| <b>Israel Druzes</b>       | <b>311</b> | <b>79</b>  | 0 | 0 | 0 | 0 | 0 | 0 | 0 | 0 | 0 | 0 | 0 | 0 | 0 | 0 | 0 | 0 | 0 | 0 | 0 |
| <b>Turkey various</b>      | <b>234</b> | <b>184</b> | 0 | 0 | 0 | 0 | 0 | 0 | 0 | 0 | 0 | 0 | 0 | 0 | 0 | 0 | 0 | 0 | 0 | 0 | 0 |
| <b>Jordan</b>              | <b>99</b>  | <b>80</b>  | 0 | 0 | 0 | 0 | 0 | 0 | 0 | 0 | 0 | 0 | 0 | 0 | 0 | 1 | 0 | 0 | 0 | 0 | 0 |
| <b>Iran Kurds</b>          | <b>25</b>  | <b>22</b>  | 0 | 0 | 0 | 0 | 0 | 0 | 0 | 0 | 0 | 0 | 0 | 0 | 0 | 0 | 0 | 0 | 0 | 0 | 0 |
| <b>Persians</b>            | <b>82</b>  | <b>61</b>  | 0 | 0 | 0 | 0 | 0 | 0 | 0 | 0 | 0 | 0 | 0 | 0 | 0 | 0 | 0 | 0 | 0 | 0 | 0 |
| <b>Saudi Arabia</b>        | <b>553</b> | <b>260</b> | 1 | 0 | 0 | 1 | 0 | 0 | 0 | 0 | 1 | 0 | 0 | 0 | 0 | 0 | 1 | 0 | 0 | 0 | 0 |
| <b>Bangladesh</b>          | <b>30</b>  | <b>27</b>  | 0 | 0 | 0 | 0 | 0 | 0 | 0 | 0 | 0 | 0 | 0 | 0 | 0 | 0 | 0 | 0 | 0 | 0 | 0 |
| <b>Gujarat</b>             | <b>91</b>  | <b>79</b>  | 0 | 0 | 0 | 0 | 0 | 0 | 0 | 0 | 0 | 0 | 0 | 0 | 0 | 0 | 0 | 0 | 0 | 0 | 0 |
| <b>India Kamataka</b>      | <b>201</b> | <b>60</b>  | 0 | 0 | 0 | 0 | 0 | 0 | 0 | 0 | 0 | 0 | 0 | 0 | 0 | 0 | 0 | 0 | 0 | 0 | 0 |
| <b>India Kerala</b>        | <b>230</b> | <b>72</b>  | 0 | 0 | 0 | 0 | 0 | 0 | 0 | 0 | 0 | 0 | 0 | 0 | 0 | 0 | 0 | 0 | 0 | 0 | 0 |
| <b>Madyah Pradesh</b>      | <b>82</b>  | <b>54</b>  | 0 | 0 | 0 | 0 | 0 | 0 | 0 | 0 | 0 | 0 | 0 | 0 | 0 | 0 | 0 | 0 | 0 | 0 | 0 |
| <b>India Maharashtra</b>   | <b>221</b> | <b>146</b> | 0 | 0 | 0 | 0 | 0 | 0 | 0 | 0 | 0 | 0 | 0 | 0 | 0 | 0 | 0 | 0 | 0 | 0 | 0 |
| <b>India Orissa</b>        | <b>153</b> | <b>106</b> | 0 | 0 | 0 | 0 | 0 | 0 | 0 | 0 | 0 | 0 | 0 | 0 | 0 | 0 | 0 | 0 | 0 | 0 | 0 |
| <b>Punjab</b>              | <b>362</b> | <b>175</b> | 0 | 0 | 0 | 0 | 0 | 0 | 0 | 0 | 0 | 0 | 0 | 0 | 0 | 0 | 0 | 0 | 0 | 0 | 0 |
| <b>Tamils Nadu</b>         | <b>427</b> | <b>207</b> | 0 | 0 | 0 | 0 | 0 | 0 | 0 | 0 | 0 | 0 | 0 | 0 | 0 | 0 | 0 | 0 | 0 | 0 | 0 |
| <b>India Tripura</b>       | <b>134</b> | <b>134</b> | 0 | 0 | 0 | 0 | 0 | 0 | 0 | 0 | 0 | 0 | 0 | 0 | 0 | 0 | 0 | 0 | 0 | 0 | 0 |
| <b>Uttard Pradesh</b>      | <b>232</b> | <b>165</b> | 0 | 0 | 0 | 0 | 0 | 0 | 0 | 0 | 0 | 0 | 0 | 0 | 0 | 0 | 0 | 0 | 0 | 0 | 0 |
| <b>Western Bengal</b>      | <b>285</b> | <b>133</b> | 0 | 0 | 0 | 0 | 0 | 0 | 0 | 0 | 0 | 0 | 0 | 0 | 0 | 0 | 0 | 0 | 0 | 0 | 0 |
| <b>Sri Lanka</b>           | <b>131</b> | <b>91</b>  | 0 | 0 | 0 | 0 | 0 | 0 | 0 | 0 | 0 | 0 | 0 | 0 | 0 | 0 | 0 | 0 | 0 | 0 | 0 |
| <b>Hindus India</b>        | <b>72</b>  | <b>59</b>  | 0 | 0 | 0 | 0 | 0 | 0 | 0 | 0 | 0 | 0 | 0 | 0 | 0 | 0 | 0 | 0 | 0 | 0 | 0 |

|                   |            |            |   |   |   |   |   |   |   |   |   |   |   |   |   |   |   |   |   |   |   |
|-------------------|------------|------------|---|---|---|---|---|---|---|---|---|---|---|---|---|---|---|---|---|---|---|
| <b>Sicily</b>     | <b>226</b> | <b>133</b> | 0 | 0 | 0 | 0 | 0 | 0 | 0 | 0 | 0 | 0 | 0 | 0 | 0 | 0 | 0 | 0 | 0 | 0 | 0 |
| <b>Galicia</b>    | <b>92</b>  | <b>51</b>  | 0 | 0 | 0 | 0 | 0 | 0 | 0 | 0 | 0 | 0 | 0 | 0 | 0 | 0 | 0 | 0 | 0 | 0 | 0 |
| <b>Catalan</b>    | <b>46</b>  | <b>28</b>  | 0 | 0 | 0 | 0 | 0 | 0 | 0 | 0 | 0 | 0 | 0 | 0 | 0 | 0 | 0 | 0 | 0 | 0 | 0 |
| <b>Andalusia</b>  | <b>115</b> | <b>70</b>  | 0 | 0 | 0 | 0 | 0 | 0 | 0 | 0 | 0 | 0 | 0 | 0 | 0 | 0 | 0 | 0 | 0 | 0 | 0 |
| <b>Portuguese</b> | <b>54</b>  | <b>37</b>  | 0 | 0 | 0 | 0 | 0 | 0 | 0 | 0 | 0 | 0 | 0 | 0 | 0 | 0 | 0 | 0 | 0 | 0 | 0 |
| <b>Corsica</b>    | <b>53</b>  | <b>35</b>  | 0 | 0 | 0 | 0 | 0 | 0 | 0 | 0 | 0 | 0 | 0 | 0 | 0 | 0 | 0 | 0 | 0 | 0 | 0 |
| <b>France</b>     | <b>110</b> | <b>72</b>  | 0 | 0 | 0 | 0 | 0 | 0 | 0 | 0 | 0 | 0 | 0 | 0 | 0 | 0 | 0 | 0 | 0 | 0 | 0 |
| <b>England</b>    | <b>100</b> | <b>66</b>  | 0 | 0 | 0 | 0 | 0 | 0 | 0 | 0 | 0 | 0 | 0 | 0 | 0 | 0 | 0 | 0 | 0 | 0 | 0 |
| <b>Greece</b>     | <b>114</b> | <b>55</b>  | 0 | 0 | 0 | 0 | 0 | 0 | 0 | 0 | 0 | 0 | 0 | 0 | 0 | 0 | 0 | 0 | 0 | 0 | 0 |

**Table S20.** Shared HVI unique haplotypes between the Antalaotra and populations from the database

|                                 | Number of individuals | Number of haplotypes | hap.01 | hap.02 | hap.03 | hap.04 | hap.05  | hap.06 | hap.07 | hap.08 | hap.09 | hap.10 | hap.11 | hap.12 | hap.13 | hap.14 | hap.15  | hap.16 | hap.17 |
|---------------------------------|-----------------------|----------------------|--------|--------|--------|--------|---------|--------|--------|--------|--------|--------|--------|--------|--------|--------|---------|--------|--------|
|                                 |                       |                      | M7c3c  | L3b    | L3c3   | L0a2   | B4a1a1a | M23    | L2a1   | E1a1   | F3b    | L3c3   | M32c   | L3e2b3 | M7c3c  | M32c   | B4a1a1a | F3b    | L3b    |
| <b>Angola Nyaneka</b>           | 147                   | 70                   | 0      | 0      | 1      | 1      | 0       | 0      | 0      | 0      | 0      | 0      | 0      | 0      | 0      | 0      | 0       | 0      | 0      |
| <b>Angola Ovimbudu</b>          | 98                    | 60                   | 0      | 0      | 1      | 1      | 0       | 0      | 1      | 0      | 0      | 0      | 0      | 0      | 0      | 0      | 0       | 0      | 0      |
| <b>Fon Benin</b>                | 171                   | 104                  | 0      | 0      | 0      | 0      | 0       | 0      | 0      | 0      | 0      | 0      | 0      | 0      | 0      | 0      | 0       | 0      | 0      |
| <b>Cabinda Angola</b>           | 110                   | 69                   | 0      | 0      | 1      | 1      | 0       | 0      | 0      | 0      | 0      | 0      | 0      | 0      | 0      | 0      | 0       | 0      | 0      |
| <b>Cabo verde</b>               | 292                   | 118                  | 0      | 0      | 0      | 0      | 1       | 0      | 0      | 0      | 0      | 0      | 0      | 0      | 0      | 0      | 0       | 0      | 0      |
| <b>Cameroon Ngumba</b>          | 88                    | 43                   | 0      | 0      | 0      | 0      | 0       | 0      | 0      | 0      | 0      | 0      | 0      | 0      | 0      | 0      | 0       | 0      | 0      |
| <b>Cameroon Pygmies Baka</b>    | 87                    | 13                   | 0      | 0      | 0      | 0      | 0       | 0      | 0      | 0      | 0      | 0      | 0      | 0      | 0      | 0      | 0       | 0      | 0      |
| <b>Cameroon Pygmies Baloka</b>  | 88                    | 5                    | 0      | 0      | 0      | 0      | 0       | 0      | 0      | 0      | 0      | 0      | 0      | 0      | 0      | 0      | 0       | 0      | 0      |
| <b>Guanche Canaries Islands</b> | 71                    | 32                   | 0      | 0      | 0      | 0      | 0       | 0      | 0      | 0      | 0      | 0      | 0      | 0      | 0      | 0      | 0       | 0      | 0      |
| <b>Egypt Arabs</b>              | 102                   | 44                   | 0      | 0      | 0      | 0      | 0       | 0      | 0      | 0      | 0      | 0      | 0      | 0      | 0      | 0      | 0       | 0      | 0      |
| <b>Egypt Copt</b>               | 100                   | 30                   | 0      | 0      | 0      | 0      | 0       | 0      | 0      | 0      | 0      | 0      | 0      | 0      | 0      | 0      | 0       | 0      | 0      |
| <b>Gabon Fong</b>               | 66                    | 35                   | 0      | 0      | 0      | 0      | 0       | 0      | 0      | 0      | 0      | 0      | 0      | 0      | 0      | 0      | 0       | 0      | 0      |
| <b>Gabon Mitsogo</b>            | 64                    | 33                   | 0      | 0      | 0      | 0      | 0       | 0      | 0      | 0      | 0      | 0      | 0      | 0      | 0      | 0      | 0       | 0      | 0      |
| <b>Gabon Nzebi</b>              | 63                    | 42                   | 0      | 0      | 0      | 0      | 0       | 0      | 0      | 0      | 0      | 0      | 0      | 0      | 0      | 0      | 0       | 0      | 0      |
| <b>Guinea Bissau</b>            | 372                   | 176                  | 0      | 1      | 0      | 0      | 0       | 0      | 0      | 0      | 0      | 0      | 0      | 0      | 0      | 0      | 0       | 0      | 0      |
| <b>Ivory coast Ahizi</b>        | 129                   | 54                   | 0      | 0      | 0      | 0      | 0       | 0      | 0      | 0      | 0      | 0      | 0      | 0      | 0      | 0      | 0       | 0      | 0      |
| <b>Ivory coast Yacouba</b>      | 61                    | 41                   | 0      | 0      | 0      | 0      | 0       | 0      | 0      | 0      | 0      | 0      | 0      | 0      | 0      | 0      | 0       | 0      | 0      |
| <b>Kenya swahili</b>            | 200                   | 117                  | 0      | 0      | 1      | 1      | 0       | 0      | 0      | 0      | 0      | 0      | 0      | 0      | 0      | 0      | 0       | 0      | 0      |
| <b>Mali Malinke</b>             | 60                    | 48                   | 0      | 0      | 0      | 0      | 0       | 0      | 0      | 0      | 0      | 0      | 0      | 0      | 0      | 0      | 0       | 0      | 0      |
| <b>Moors Mauritania</b>         | 64                    | 107                  | 0      | 0      | 0      | 0      | 0       | 0      | 0      | 0      | 0      | 0      | 0      | 0      | 0      | 0      | 0       | 0      | 0      |
| <b>Morocco Berbers</b>          | 181                   | 107                  | 0      | 0      | 0      | 0      | 0       | 0      | 0      | 0      | 0      | 0      | 0      | 0      | 0      | 0      | 0       | 0      | 0      |
| <b>Mozambique</b>               | 416                   | 135                  | 0      | 0      | 1      | 1      | 0       | 0      | 1      | 0      | 0      | 0      | 0      | 0      | 0      | 0      | 0       | 0      | 0      |
| <b>Rwanda Hutu</b>              | 106                   | 58                   | 0      | 0      | 0      | 0      | 0       | 0      | 0      | 0      | 0      | 0      | 0      | 0      | 0      | 0      | 0       | 0      | 0      |
| <b>Sao Tome</b>                 | 103                   | 61                   | 0      | 0      | 0      | 0      | 0       | 0      | 0      | 0      | 0      | 0      | 0      | 0      | 0      | 0      | 0       | 0      | 0      |
| <b>Senegal Mendenka</b>         | 119                   | 50                   | 0      | 0      | 0      | 0      | 0       | 0      | 0      | 0      | 0      | 0      | 0      | 0      | 0      | 0      | 0       | 0      | 0      |

|                                 |     |     |   |   |   |   |   |   |   |   |   |   |   |   |   |   |   |   |
|---------------------------------|-----|-----|---|---|---|---|---|---|---|---|---|---|---|---|---|---|---|---|
| <b>Senegal Wolof</b>            | 91  | 76  | 0 | 0 | 0 | 0 | 0 | 0 | 0 | 0 | 0 | 0 | 0 | 0 | 0 | 0 | 0 | 0 |
| <b>South Africa Kung</b>        | 59  | 14  | 0 | 0 | 0 | 0 | 0 | 0 | 0 | 0 | 0 | 0 | 0 | 0 | 0 | 0 | 0 | 0 |
| <b>Tanzania Hadza</b>           | 79  | 26  | 0 | 0 | 0 | 0 | 0 | 0 | 0 | 0 | 0 | 0 | 0 | 0 | 0 | 0 | 0 | 0 |
| <b>Tanzania Sandawe</b>         | 82  | 28  | 0 | 0 | 0 | 0 | 0 | 0 | 0 | 0 | 0 | 0 | 0 | 0 | 0 | 0 | 0 | 0 |
| <b>Zimbabwe</b>                 | 58  | 38  | 0 | 0 | 0 | 1 | 0 | 0 | 1 | 0 | 0 | 0 | 0 | 0 | 0 | 0 | 0 | 0 |
| <b>Tunisia</b>                  | 47  | 42  | 0 | 0 | 0 | 0 | 0 | 0 | 0 | 0 | 0 | 0 | 0 | 0 | 0 | 0 | 0 | 0 |
| <b>Algeria</b>                  | 47  | 26  | 0 | 0 | 0 | 0 | 0 | 0 | 0 | 0 | 0 | 0 | 0 | 0 | 0 | 0 | 0 | 0 |
| <b>Sahawari</b>                 | 56  | 41  | 0 | 0 | 0 | 0 | 0 | 0 | 0 | 0 | 0 | 0 | 0 | 0 | 0 | 0 | 0 | 0 |
| <b>Samar Tunisia</b>            | 124 | 6   | 0 | 0 | 0 | 0 | 0 | 0 | 0 | 0 | 0 | 0 | 0 | 0 | 0 | 0 | 0 | 0 |
| <b>Ethiopia Amharic</b>         | 270 | 139 | 0 | 0 | 0 | 0 | 0 | 0 | 0 | 0 | 0 | 0 | 0 | 0 | 0 | 0 | 0 | 0 |
| <b>Sudan-Nubia</b>              | 161 | 106 | 0 | 0 | 0 | 0 | 0 | 0 | 0 | 0 | 0 | 0 | 0 | 0 | 0 | 0 | 0 | 0 |
| <b>Tunisia various</b>          | 102 | 45  | 0 | 0 | 0 | 0 | 0 | 0 | 0 | 0 | 0 | 0 | 0 | 0 | 0 | 0 | 0 | 0 |
| <b>Morocco Berbers Bourhiah</b> | 70  | 35  | 0 | 0 | 0 | 0 | 0 | 0 | 0 | 0 | 0 | 0 | 0 | 0 | 0 | 0 | 0 | 0 |
| <b>Morocco Berbers Figuig</b>   | 94  | 28  | 0 | 0 | 0 | 0 | 0 | 0 | 0 | 0 | 0 | 0 | 0 | 0 | 0 | 0 | 0 | 0 |
| <b>Egypt Berbers Siwa</b>       | 78  | 22  | 0 | 0 | 0 | 0 | 0 | 0 | 0 | 0 | 0 | 0 | 0 | 0 | 0 | 0 | 0 | 0 |
| <b>Lybia various</b>            | 129 | 16  | 0 | 0 | 0 | 0 | 0 | 0 | 0 | 0 | 0 | 0 | 0 | 0 | 0 | 0 | 0 | 0 |
| <b>Ethiopia various</b>         | 116 | 71  | 0 | 0 | 0 | 1 | 0 | 0 | 0 | 0 | 0 | 0 | 0 | 0 | 0 | 0 | 0 | 0 |
| <b>Thailand various</b>         | 71  | 61  | 0 | 0 | 0 | 0 | 0 | 0 | 0 | 0 | 0 | 0 | 0 | 0 | 0 | 0 | 0 | 0 |
| <b>Vietnam</b>                  | 65  | 50  | 0 | 0 | 0 | 0 | 0 | 0 | 0 | 0 | 0 | 0 | 0 | 0 | 0 | 0 | 0 | 0 |
| <b>Adonara</b>                  | 73  | 30  | 0 | 0 | 0 | 0 | 0 | 0 | 0 | 0 | 0 | 0 | 0 | 0 | 0 | 1 | 0 | 0 |
| <b>Flores</b>                   | 73  | 37  | 0 | 0 | 0 | 0 | 1 | 0 | 0 | 0 | 0 | 0 | 0 | 0 | 0 | 1 | 0 | 0 |
| <b>Banjamarsin</b>              | 110 | 80  | 1 | 0 | 0 | 0 | 1 | 0 | 0 | 0 | 0 | 1 | 0 | 0 | 0 | 1 | 0 | 0 |
| <b>New Guinea Highlands</b>     | 71  | 26  | 0 | 0 | 0 | 0 | 0 | 0 | 0 | 0 | 0 | 0 | 0 | 0 | 0 | 0 | 0 | 0 |
| <b>Solomon islands</b>          | 64  | 14  | 0 | 0 | 0 | 0 | 1 | 0 | 0 | 0 | 0 | 0 | 0 | 0 | 0 | 1 | 0 | 0 |
| <b>Bali</b>                     | 64  | 52  | 1 | 0 | 0 | 0 | 0 | 0 | 0 | 0 | 0 | 0 | 0 | 0 | 0 | 0 | 0 | 0 |
| <b>Sumatra Medan</b>            | 42  | 29  | 1 | 0 | 0 | 0 | 0 | 0 | 0 | 0 | 0 | 0 | 0 | 0 | 0 | 0 | 0 | 0 |
| <b>Sumatra Pekanbaru</b>        | 54  | 34  | 1 | 0 | 0 | 0 | 0 | 0 | 0 | 0 | 0 | 0 | 0 | 0 | 0 | 0 | 0 | 0 |
| <b>Manus Province</b>           | 144 | 35  | 1 | 0 | 0 | 0 | 1 | 0 | 0 | 0 | 0 | 0 | 0 | 0 | 0 | 1 | 0 | 0 |
| <b>Nicobar</b>                  | 46  | 22  | 0 | 0 | 0 | 0 | 0 | 0 | 0 | 0 | 0 | 0 | 0 | 0 | 0 | 0 | 0 | 0 |
| <b>Onges Nicobar</b>            | 63  | 6   | 0 | 0 | 0 | 0 | 0 | 0 | 0 | 0 | 0 | 0 | 0 | 0 | 0 | 0 | 0 | 0 |



|                            |     |     |   |   |   |   |   |   |   |   |   |   |   |   |   |   |   |   |   |   |   |
|----------------------------|-----|-----|---|---|---|---|---|---|---|---|---|---|---|---|---|---|---|---|---|---|---|
| <b>Philippines</b>         | 144 | 70  | 1 | 0 | 0 | 0 | 0 | 0 | 0 | 0 | 0 | 0 | 0 | 0 | 0 | 0 | 0 | 0 | 0 |   |   |
| <b>Iban</b>                | 83  | 30  | 0 | 0 | 0 | 0 | 0 | 0 | 0 | 0 | 0 | 0 | 0 | 0 | 0 | 0 | 0 | 1 | 0 | 0 |   |
| <b>Malay Kuala-Lumpur</b>  | 124 | 90  | 1 | 0 | 0 | 0 | 0 | 0 | 0 | 0 | 0 | 0 | 0 | 1 | 0 | 1 | 0 | 0 | 0 | 0 |   |
| <b>Malay Singapore</b>     | 205 | 132 | 1 | 0 | 0 | 0 | 0 | 0 | 0 | 0 | 0 | 0 | 0 | 0 | 0 | 1 | 0 | 0 | 0 | 0 |   |
| <b>New Guinea Gidra</b>    | 59  | 20  | 0 | 0 | 0 | 0 | 0 | 0 | 0 | 0 | 0 | 0 | 0 | 0 | 0 | 0 | 0 | 0 | 0 | 0 |   |
| <b>Bismark Archipelago</b> | 47  | 21  | 0 | 0 | 0 | 0 | 1 | 0 | 0 | 0 | 0 | 0 | 0 | 0 | 0 | 0 | 0 | 0 | 1 | 0 | 0 |
| <b>Vanuatu</b>             | 42  | 11  | 0 | 0 | 0 | 0 | 1 | 0 | 0 | 0 | 0 | 0 | 0 | 0 | 0 | 0 | 0 | 0 | 0 | 0 | 0 |
| <b>Socotra</b>             | 65  | 17  | 0 | 0 | 0 | 0 | 0 | 0 | 0 | 0 | 0 | 0 | 0 | 0 | 0 | 0 | 0 | 0 | 0 | 0 | 0 |
| <b>Iran</b>                | 146 | 113 | 0 | 0 | 0 | 0 | 0 | 0 | 0 | 0 | 0 | 0 | 0 | 0 | 0 | 0 | 0 | 0 | 0 | 0 | 0 |
| <b>Syria</b>               | 49  | 46  | 0 | 0 | 0 | 0 | 0 | 0 | 0 | 0 | 0 | 0 | 0 | 0 | 0 | 0 | 0 | 0 | 0 | 0 | 0 |
| <b>Yemen</b>               | 115 | 67  | 0 | 0 | 1 | 1 | 0 | 0 | 0 | 0 | 0 | 0 | 0 | 0 | 0 | 0 | 0 | 0 | 0 | 0 | 0 |
| <b>Israel</b>              | 45  | 25  | 0 | 0 | 0 | 0 | 0 | 0 | 0 | 0 | 0 | 0 | 0 | 0 | 0 | 0 | 0 | 0 | 0 | 0 | 0 |
| <b>Kurds</b>               | 78  | 57  | 0 | 0 | 0 | 0 | 0 | 0 | 0 | 0 | 0 | 0 | 0 | 0 | 0 | 0 | 0 | 0 | 0 | 0 | 0 |
| <b>Cyprus</b>              | 91  | 59  | 0 | 0 | 0 | 0 | 0 | 0 | 0 | 0 | 0 | 0 | 0 | 0 | 0 | 0 | 0 | 0 | 0 | 0 | 0 |
| <b>Irak</b>                | 52  | 52  | 0 | 0 | 0 | 0 | 0 | 0 | 0 | 0 | 0 | 0 | 0 | 0 | 0 | 0 | 0 | 0 | 0 | 0 | 0 |
| <b>Iranians</b>            | 731 | 394 | 0 | 0 | 0 | 0 | 0 | 0 | 0 | 0 | 0 | 0 | 0 | 0 | 0 | 0 | 0 | 0 | 0 | 0 | 0 |
| <b>Dubai</b>               | 249 | 154 | 0 | 0 | 1 | 1 | 0 | 1 | 1 | 0 | 0 | 0 | 0 | 0 | 0 | 0 | 0 | 0 | 0 | 0 | 0 |
| <b>Israel Druzes</b>       | 311 | 79  | 0 | 0 | 0 | 0 | 0 | 0 | 0 | 0 | 0 | 0 | 0 | 0 | 0 | 0 | 0 | 0 | 0 | 0 | 0 |
| <b>Turkey various</b>      | 234 | 184 | 0 | 0 | 0 | 0 | 0 | 0 | 0 | 0 | 0 | 0 | 0 | 0 | 0 | 0 | 0 | 0 | 0 | 0 | 0 |
| <b>Jordan</b>              | 99  | 80  | 0 | 0 | 0 | 0 | 0 | 0 | 0 | 0 | 0 | 0 | 0 | 0 | 0 | 0 | 0 | 0 | 0 | 0 | 0 |
| <b>Iran Kurds</b>          | 25  | 22  | 0 | 0 | 0 | 0 | 0 | 0 | 0 | 0 | 0 | 0 | 0 | 0 | 0 | 0 | 0 | 0 | 0 | 0 | 0 |
| <b>Persians</b>            | 82  | 61  | 0 | 0 | 0 | 0 | 0 | 0 | 0 | 0 | 0 | 0 | 0 | 0 | 0 | 0 | 0 | 0 | 0 | 0 | 0 |
| <b>Saudi Arabia</b>        | 553 | 260 | 0 | 1 | 0 | 1 | 0 | 0 | 0 | 0 | 0 | 0 | 0 | 0 | 0 | 0 | 0 | 0 | 0 | 0 | 0 |
| <b>Bangladesh</b>          | 30  | 27  | 0 | 0 | 0 | 0 | 0 | 0 | 0 | 0 | 0 | 0 | 0 | 0 | 0 | 0 | 0 | 0 | 0 | 0 | 0 |
| <b>Gujarat</b>             | 91  | 79  | 0 | 0 | 0 | 0 | 0 | 0 | 0 | 0 | 0 | 0 | 0 | 0 | 0 | 0 | 0 | 0 | 0 | 0 | 0 |
| <b>India Kamataka</b>      | 201 | 60  | 0 | 0 | 0 | 0 | 0 | 0 | 0 | 0 | 0 | 0 | 0 | 0 | 0 | 0 | 0 | 0 | 0 | 0 | 0 |
| <b>India Kerala</b>        | 230 | 72  | 0 | 0 | 0 | 0 | 0 | 0 | 0 | 0 | 0 | 0 | 0 | 0 | 0 | 0 | 0 | 0 | 0 | 0 | 0 |
| <b>Madyah Pradesh</b>      | 82  | 54  | 0 | 0 | 0 | 0 | 0 | 0 | 0 | 0 | 0 | 0 | 0 | 0 | 0 | 0 | 0 | 0 | 0 | 0 | 0 |
| <b>India Maharashtra</b>   | 221 | 146 | 0 | 0 | 0 | 0 | 0 | 0 | 0 | 0 | 0 | 0 | 0 | 0 | 0 | 0 | 0 | 0 | 0 | 0 | 0 |
| <b>India Orissa</b>        | 153 | 106 | 0 | 0 | 0 | 0 | 0 | 0 | 0 | 0 | 0 | 0 | 0 | 0 | 0 | 0 | 0 | 0 | 0 | 0 | 0 |
| <b>Punjab</b>              | 362 | 175 | 0 | 0 | 0 | 0 | 0 | 0 | 0 | 0 | 0 | 0 | 0 | 0 | 0 | 0 | 0 | 0 | 0 | 0 | 0 |

|                       |     |     |   |   |   |   |   |   |   |   |   |   |   |   |   |   |   |   |
|-----------------------|-----|-----|---|---|---|---|---|---|---|---|---|---|---|---|---|---|---|---|
| <b>Tamils Nadu</b>    | 427 | 207 | 0 | 0 | 0 | 0 | 0 | 0 | 0 | 0 | 0 | 0 | 0 | 0 | 0 | 0 | 0 | 0 |
| <b>India Tripura</b>  | 134 | 134 | 0 | 0 | 0 | 0 | 0 | 0 | 0 | 0 | 0 | 0 | 0 | 0 | 0 | 0 | 0 | 0 |
| <b>Uttard Pradesh</b> | 232 | 165 | 0 | 0 | 0 | 0 | 0 | 0 | 0 | 0 | 0 | 0 | 0 | 0 | 0 | 0 | 0 | 0 |
| <b>Western Bengal</b> | 285 | 133 | 0 | 0 | 0 | 0 | 0 | 0 | 0 | 0 | 0 | 0 | 0 | 0 | 0 | 0 | 0 | 0 |
| <b>Sri Lanka</b>      | 131 | 91  | 0 | 0 | 0 | 0 | 0 | 0 | 0 | 0 | 0 | 0 | 0 | 0 | 0 | 0 | 0 | 0 |
| <b>Hindus India</b>   | 72  | 59  | 0 | 0 | 0 | 0 | 0 | 0 | 0 | 0 | 0 | 0 | 0 | 0 | 0 | 0 | 0 | 0 |
| <b>Sicily</b>         | 226 | 133 | 0 | 0 | 0 | 0 | 0 | 0 | 0 | 0 | 0 | 0 | 0 | 0 | 0 | 0 | 0 | 0 |
| <b>Galicia</b>        | 92  | 51  | 0 | 0 | 0 | 0 | 0 | 0 | 0 | 0 | 0 | 0 | 0 | 0 | 0 | 0 | 0 | 0 |
| <b>Catalan</b>        | 46  | 28  | 0 | 0 | 0 | 0 | 0 | 0 | 0 | 0 | 0 | 0 | 0 | 0 | 0 | 0 | 0 | 0 |
| <b>Andalusia</b>      | 115 | 70  | 0 | 0 | 0 | 0 | 0 | 0 | 0 | 0 | 0 | 0 | 0 | 0 | 0 | 0 | 0 | 0 |
| <b>Portuguese</b>     | 54  | 37  | 0 | 0 | 0 | 0 | 0 | 0 | 0 | 0 | 0 | 0 | 0 | 0 | 0 | 0 | 0 | 0 |
| <b>Corsica</b>        | 53  | 35  | 0 | 0 | 0 | 0 | 0 | 0 | 0 | 0 | 0 | 0 | 0 | 0 | 0 | 0 | 0 | 0 |
| <b>France</b>         | 110 | 72  | 0 | 0 | 0 | 0 | 0 | 0 | 0 | 0 | 0 | 0 | 0 | 0 | 0 | 0 | 0 | 0 |
| <b>England</b>        | 100 | 66  | 0 | 0 | 0 | 0 | 0 | 0 | 0 | 0 | 0 | 0 | 0 | 0 | 0 | 0 | 0 | 0 |
| <b>Greece</b>         | 114 | 55  | 0 | 0 | 0 | 0 | 0 | 0 | 0 | 0 | 0 | 0 | 0 | 0 | 0 | 0 | 0 | 0 |

**Table S21.** Shared HVI unique haplotypes between the Anteony and populations from the database

|                          | Number of individuals | Number of haplotypes | hap.01 | hap.02 | hap.03 | hap.04 | hap.05 | hap.06 | hap.07  | hap.08 | hap.09 | hap.10 | hap.11 | hap.12 | hap.13 | hap.14 | hap.15 | hap.16  | hap.17 | hap.18 | hap.19 | hap.20 | hap.21 | hap.22 | hap.23 | hap.24 | hap.25 | hap.26 | hap.27 |
|--------------------------|-----------------------|----------------------|--------|--------|--------|--------|--------|--------|---------|--------|--------|--------|--------|--------|--------|--------|--------|---------|--------|--------|--------|--------|--------|--------|--------|--------|--------|--------|--------|
|                          |                       |                      | L3d    | L2a1   | M7c3c  | L3b    | L3e2b3 | L0a2   | B4a1a1a | M23    | L2a1   | L3e1a  | F3b    | L2a1   | L3b    | L0a1'4 | L3a    | B4a1a1a | L3b    | L3b    | L3e3   | L3e2b  | M23    | M32c   | L2a1   | L3e3   | L3e2b3 | O1     | L3k    |
| Angola Nyaneka           | 147                   | 70                   | 1      | 0      | 0      | 0      | 0      | 1      | 0       | 0      | 0      | 0      | 0      | 0      | 1      | 0      | 0      | 0       | 0      | 0      | 0      | 1      | 0      | 0      | 0      | 0      | 0      | 0      | 0      |
| Angola Ovimbudu          | 98                    | 60                   | 1      | 0      | 0      | 0      | 0      | 1      | 0       | 0      | 1      | 1      | 0      | 0      | 0      | 1      | 0      | 0       | 0      | 0      | 0      | 1      | 0      | 0      | 0      | 0      | 0      | 0      | 0      |
| Fon Benin                | 171                   | 104                  | 1      | 0      | 0      | 0      | 0      | 0      | 0       | 0      | 0      | 0      | 0      | 0      | 0      | 0      | 0      | 1       | 0      | 0      | 1      | 0      | 0      | 0      | 0      | 0      | 0      | 0      | 0      |
| Cabinda Angola           | 110                   | 69                   | 0      | 0      | 0      | 0      | 0      | 1      | 0       | 0      | 0      | 1      | 0      | 0      | 0      | 1      | 0      | 0       | 0      | 0      | 0      | 1      | 0      | 0      | 0      | 0      | 0      | 0      | 0      |
| Cabo verde               | 292                   | 118                  | 0      | 0      | 0      | 0      | 0      | 0      | 1       | 0      | 0      | 0      | 0      | 0      | 0      | 0      | 0      | 0       | 0      | 0      | 0      | 1      | 0      | 0      | 0      | 0      | 0      | 0      | 0      |
| Cameroon Ngumba          | 88                    | 43                   | 0      | 0      | 0      | 0      | 0      | 0      | 0       | 0      | 0      | 0      | 0      | 0      | 0      | 0      | 0      | 0       | 0      | 0      | 0      | 1      | 0      | 0      | 0      | 0      | 0      | 0      | 0      |
| Cameroon Pygmies Baka    | 87                    | 13                   | 0      | 0      | 0      | 0      | 0      | 0      | 0       | 0      | 0      | 0      | 0      | 0      | 0      | 0      | 0      | 0       | 0      | 0      | 0      | 0      | 0      | 0      | 0      | 0      | 0      | 0      | 0      |
| Cameroon Pygmies Baloka  | 88                    | 5                    | 0      | 0      | 0      | 0      | 0      | 0      | 0       | 0      | 0      | 0      | 0      | 0      | 0      | 0      | 0      | 0       | 0      | 0      | 0      | 0      | 0      | 0      | 0      | 0      | 0      | 0      | 0      |
| Guanche Canaries Islands | 71                    | 32                   | 0      | 0      | 0      | 0      | 0      | 0      | 0       | 0      | 0      | 0      | 0      | 0      | 0      | 0      | 0      | 0       | 0      | 0      | 0      | 0      | 0      | 0      | 0      | 0      | 0      | 0      | 0      |
| Egypt Arabs              | 102                   | 44                   | 0      | 0      | 0      | 0      | 0      | 0      | 0       | 0      | 0      | 0      | 0      | 0      | 0      | 0      | 0      | 0       | 0      | 0      | 0      | 0      | 0      | 0      | 0      | 0      | 0      | 0      | 0      |
| Egypt Copt               | 100                   | 30                   | 0      | 0      | 0      | 0      | 0      | 0      | 0       | 0      | 0      | 0      | 0      | 0      | 0      | 0      | 0      | 0       | 0      | 0      | 0      | 0      | 0      | 0      | 0      | 0      | 0      | 0      | 0      |
| Gabon Fong               | 66                    | 35                   | 0      | 0      | 0      | 0      | 0      | 0      | 0       | 0      | 0      | 1      | 0      | 0      | 0      | 0      | 0      | 0       | 0      | 0      | 0      | 1      | 0      | 0      | 0      | 0      | 0      | 0      | 0      |
| Gabon Mitsogo            | 64                    | 33                   | 0      | 0      | 0      | 0      | 0      | 0      | 0       | 0      | 0      | 0      | 0      | 0      | 0      | 0      | 0      | 0       | 0      | 0      | 0      | 0      | 0      | 0      | 0      | 0      | 0      | 0      | 0      |
| Gabon Nzebi              | 63                    | 42                   | 1      | 0      | 0      | 0      | 0      | 0      | 0       | 0      | 0      | 1      | 0      | 0      | 0      | 0      | 0      | 0       | 0      | 0      | 0      | 1      | 0      | 0      | 0      | 0      | 0      | 0      | 0      |
| Guinea Bissau            | 372                   | 176                  | 1      | 0      | 0      | 1      | 0      | 0      | 0       | 0      | 0      | 0      | 0      | 0      | 0      | 0      | 0      | 1       | 0      | 0      | 1      | 0      | 0      | 0      | 0      | 0      | 0      | 0      | 0      |
| Ivory coast Ahizi        | 129                   | 54                   | 0      | 0      | 0      | 0      | 0      | 0      | 0       | 0      | 0      | 0      | 0      | 0      | 0      | 0      | 0      | 0       | 0      | 0      | 0      | 1      | 0      | 0      | 0      | 0      | 0      | 0      | 0      |
| Ivory coast Yacouba      | 61                    | 41                   | 0      | 0      | 0      | 0      | 0      | 0      | 0       | 0      | 0      | 0      | 0      | 0      | 0      | 0      | 0      | 0       | 0      | 0      | 0      | 0      | 0      | 0      | 0      | 0      | 0      | 0      | 0      |
| Kenya swahili            | 200                   | 117                  | 0      | 0      | 0      | 0      | 0      | 1      | 0       | 0      | 0      | 0      | 0      | 0      | 0      | 1      | 0      | 0       | 0      | 0      | 1      | 0      | 0      | 0      | 0      | 0      | 0      | 0      | 0      |
| Mali Malinke             | 60                    | 48                   | 0      | 0      | 0      | 0      | 0      | 0      | 0       | 0      | 0      | 0      | 0      | 0      | 0      | 0      | 0      | 1       | 0      | 0      | 0      | 0      | 0      | 0      | 0      | 0      | 0      | 0      | 0      |
| Moors Mauritania         | 64                    | 107                  | 0      | 0      | 0      | 0      | 0      | 0      | 0       | 0      | 0      | 0      | 0      | 0      | 0      | 0      | 0      | 0       | 0      | 0      | 0      | 0      | 0      | 0      | 0      | 0      | 0      | 0      | 0      |
| Morocco Berbers          | 181                   | 107                  | 0      | 0      | 0      | 0      | 0      | 0      | 0       | 0      | 0      | 0      | 0      | 0      | 1      | 0      | 0      | 0       | 0      | 0      | 0      | 0      | 0      | 0      | 0      | 0      | 0      | 0      | 0      |
| Mozambique               | 416                   | 135                  | 1      | 0      | 0      | 0      | 0      | 1      | 0       | 0      | 1      | 1      | 0      | 0      | 0      | 1      | 0      | 0       | 0      | 0      | 0      | 1      | 0      | 0      | 0      | 0      | 0      | 0      | 0      |





|                          |     |     |   |   |   |   |   |   |   |   |   |   |   |   |   |   |   |   |   |   |   |   |   |   |   |   |   |   |   |   |
|--------------------------|-----|-----|---|---|---|---|---|---|---|---|---|---|---|---|---|---|---|---|---|---|---|---|---|---|---|---|---|---|---|---|
| <b>India Kamataka</b>    | 201 | 60  | 0 | 0 | 0 | 0 | 0 | 0 | 0 | 0 | 0 | 0 | 0 | 0 | 0 | 0 | 0 | 0 | 0 | 0 | 0 | 0 | 0 | 0 | 0 | 0 | 0 | 0 | 0 | 0 |
| <b>India Kerala</b>      | 230 | 72  | 0 | 0 | 0 | 0 | 0 | 0 | 0 | 0 | 0 | 0 | 0 | 0 | 0 | 0 | 0 | 0 | 0 | 0 | 0 | 0 | 0 | 0 | 0 | 0 | 0 | 0 | 0 | 0 |
| <b>Madyah Pradesh</b>    | 82  | 54  | 0 | 0 | 0 | 0 | 0 | 0 | 0 | 0 | 0 | 0 | 0 | 0 | 0 | 0 | 0 | 0 | 0 | 0 | 0 | 0 | 0 | 0 | 0 | 0 | 0 | 0 | 0 | 0 |
| <b>India Maharashtra</b> | 221 | 146 | 0 | 0 | 0 | 0 | 0 | 0 | 0 | 0 | 0 | 0 | 0 | 0 | 0 | 0 | 0 | 0 | 0 | 0 | 0 | 0 | 0 | 0 | 0 | 0 | 0 | 0 | 0 | 0 |
| <b>India Orissa</b>      | 153 | 106 | 0 | 0 | 0 | 0 | 0 | 0 | 0 | 0 | 0 | 0 | 0 | 0 | 0 | 0 | 0 | 0 | 0 | 0 | 0 | 0 | 0 | 0 | 0 | 0 | 0 | 0 | 0 | 0 |
| <b>Punjab</b>            | 362 | 175 | 0 | 0 | 0 | 0 | 0 | 0 | 0 | 0 | 0 | 0 | 0 | 0 | 0 | 0 | 0 | 0 | 0 | 0 | 0 | 0 | 0 | 0 | 0 | 0 | 0 | 0 | 0 | 0 |
| <b>Tamils Nadu</b>       | 427 | 207 | 0 | 0 | 0 | 0 | 0 | 0 | 0 | 0 | 0 | 0 | 0 | 0 | 0 | 0 | 0 | 0 | 0 | 0 | 0 | 0 | 0 | 0 | 0 | 0 | 0 | 0 | 0 | 0 |
| <b>India Tripura</b>     | 134 | 134 | 0 | 0 | 0 | 0 | 0 | 0 | 0 | 0 | 0 | 0 | 0 | 0 | 0 | 0 | 0 | 0 | 0 | 0 | 0 | 0 | 0 | 0 | 0 | 0 | 0 | 0 | 0 | 0 |
| <b>Uttard Pradesh</b>    | 232 | 165 | 0 | 0 | 0 | 0 | 0 | 0 | 0 | 0 | 0 | 0 | 0 | 0 | 0 | 0 | 0 | 0 | 0 | 0 | 0 | 0 | 0 | 0 | 0 | 0 | 0 | 0 | 0 | 0 |
| <b>Western Bengal</b>    | 285 | 133 | 0 | 0 | 0 | 0 | 0 | 0 | 0 | 0 | 0 | 0 | 0 | 0 | 0 | 0 | 0 | 0 | 0 | 0 | 0 | 0 | 0 | 0 | 0 | 0 | 0 | 0 | 0 | 0 |
| <b>Sri Lanka</b>         | 131 | 91  | 0 | 0 | 0 | 0 | 0 | 0 | 0 | 0 | 0 | 0 | 0 | 0 | 0 | 0 | 0 | 0 | 0 | 0 | 0 | 0 | 0 | 0 | 0 | 0 | 0 | 0 | 0 | 0 |
| <b>Hindus India</b>      | 72  | 59  | 0 | 0 | 0 | 0 | 0 | 0 | 0 | 0 | 0 | 0 | 0 | 0 | 0 | 0 | 0 | 0 | 0 | 0 | 0 | 0 | 0 | 0 | 0 | 0 | 0 | 0 | 0 | 0 |
| <b>Sicily</b>            | 226 | 133 | 0 | 0 | 0 | 0 | 0 | 0 | 0 | 0 | 0 | 0 | 0 | 0 | 0 | 0 | 0 | 0 | 0 | 0 | 0 | 0 | 0 | 0 | 0 | 0 | 0 | 0 | 0 | 0 |
| <b>Galicia</b>           | 92  | 51  | 0 | 0 | 0 | 0 | 0 | 0 | 0 | 0 | 0 | 0 | 0 | 0 | 0 | 0 | 0 | 0 | 0 | 0 | 0 | 0 | 0 | 0 | 0 | 0 | 0 | 0 | 0 | 0 |
| <b>Catalan</b>           | 46  | 28  | 0 | 0 | 0 | 0 | 0 | 0 | 0 | 0 | 0 | 0 | 0 | 0 | 0 | 0 | 0 | 0 | 0 | 0 | 0 | 0 | 0 | 0 | 0 | 0 | 0 | 0 | 0 | 0 |
| <b>Andalusia</b>         | 115 | 70  | 0 | 0 | 0 | 0 | 0 | 0 | 0 | 0 | 0 | 0 | 0 | 0 | 0 | 0 | 0 | 0 | 0 | 0 | 0 | 0 | 0 | 0 | 0 | 0 | 0 | 0 | 0 | 0 |
| <b>Portuguese</b>        | 54  | 37  | 0 | 0 | 0 | 0 | 0 | 0 | 0 | 0 | 0 | 0 | 0 | 0 | 0 | 0 | 0 | 0 | 0 | 0 | 0 | 0 | 0 | 0 | 0 | 0 | 0 | 0 | 0 | 0 |
| <b>Corsica</b>           | 53  | 35  | 0 | 0 | 0 | 0 | 0 | 0 | 0 | 0 | 0 | 0 | 0 | 0 | 0 | 0 | 0 | 0 | 0 | 0 | 0 | 0 | 0 | 0 | 0 | 0 | 0 | 0 | 0 | 0 |
| <b>France</b>            | 110 | 72  | 0 | 0 | 0 | 0 | 0 | 0 | 0 | 0 | 0 | 0 | 0 | 0 | 0 | 0 | 0 | 0 | 0 | 0 | 0 | 0 | 0 | 0 | 0 | 0 | 0 | 0 | 0 | 0 |
| <b>England</b>           | 100 | 66  | 0 | 0 | 0 | 0 | 0 | 0 | 0 | 0 | 0 | 0 | 0 | 0 | 0 | 0 | 0 | 0 | 0 | 0 | 0 | 0 | 0 | 0 | 0 | 0 | 0 | 0 | 0 | 0 |
| <b>Greece</b>            | 114 | 55  | 0 | 0 | 0 | 0 | 0 | 0 | 0 | 0 | 0 | 0 | 0 | 0 | 0 | 0 | 0 | 0 | 0 | 0 | 0 | 0 | 0 | 0 | 0 | 0 | 0 | 0 | 0 | 0 |

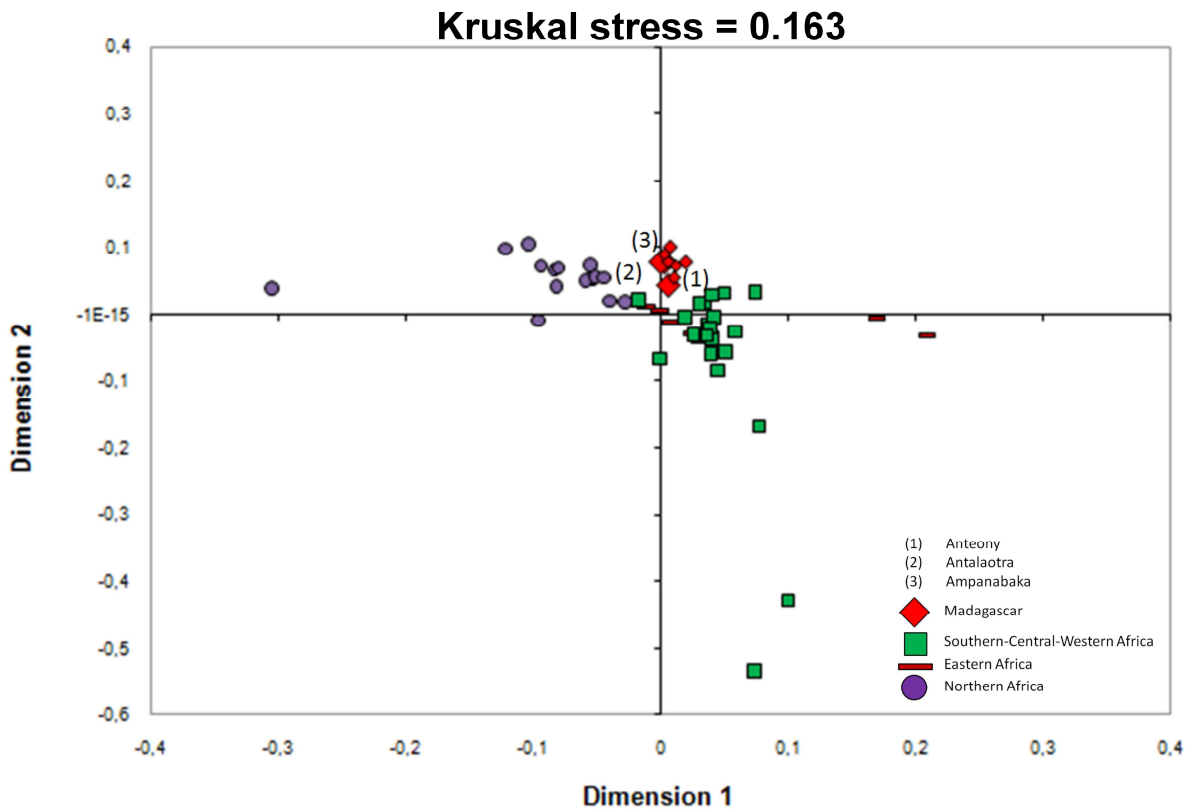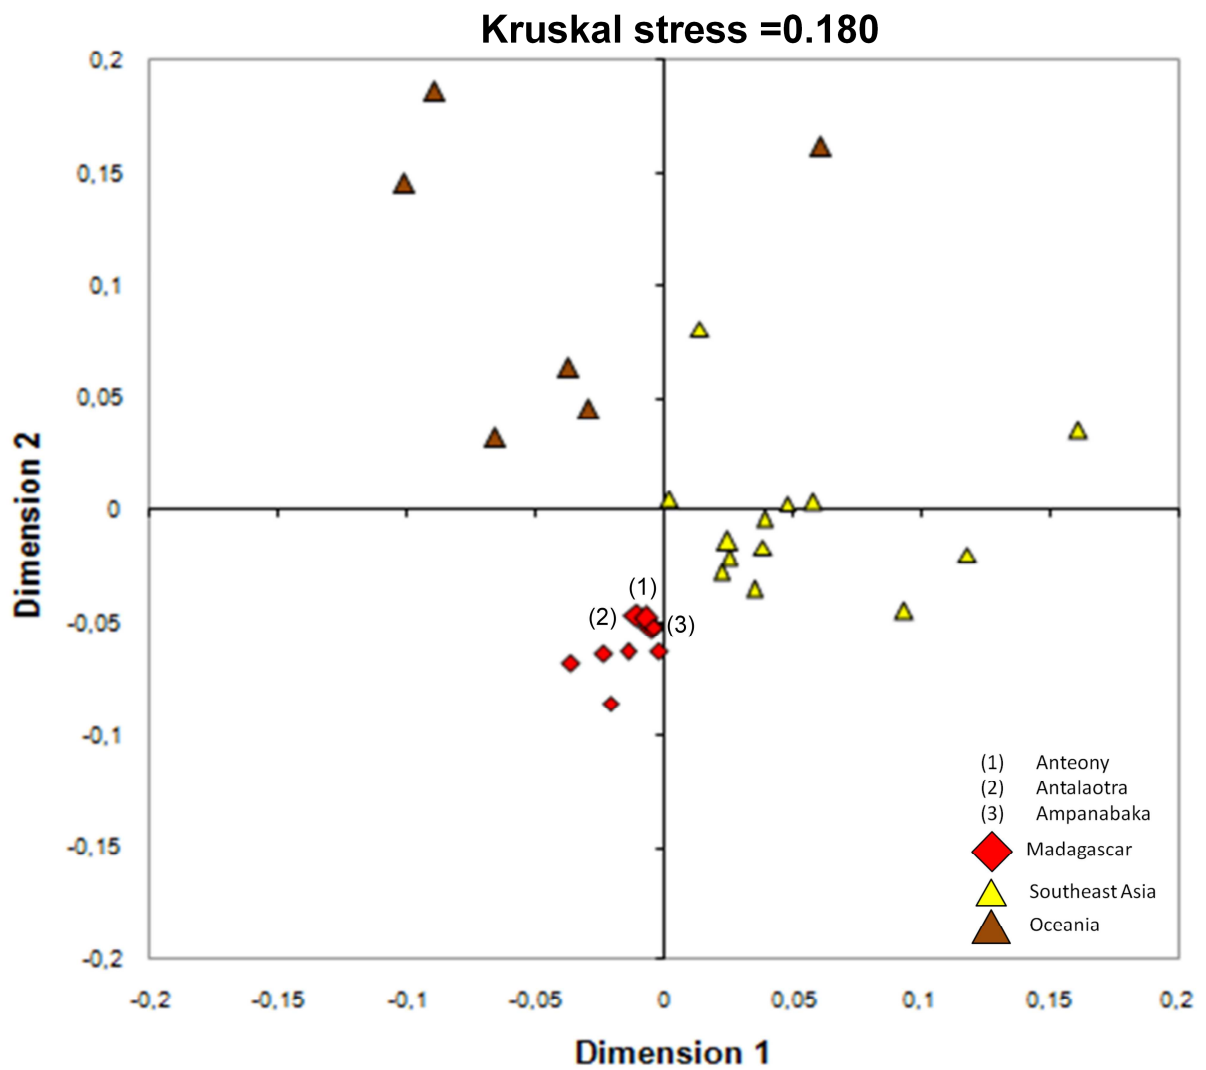

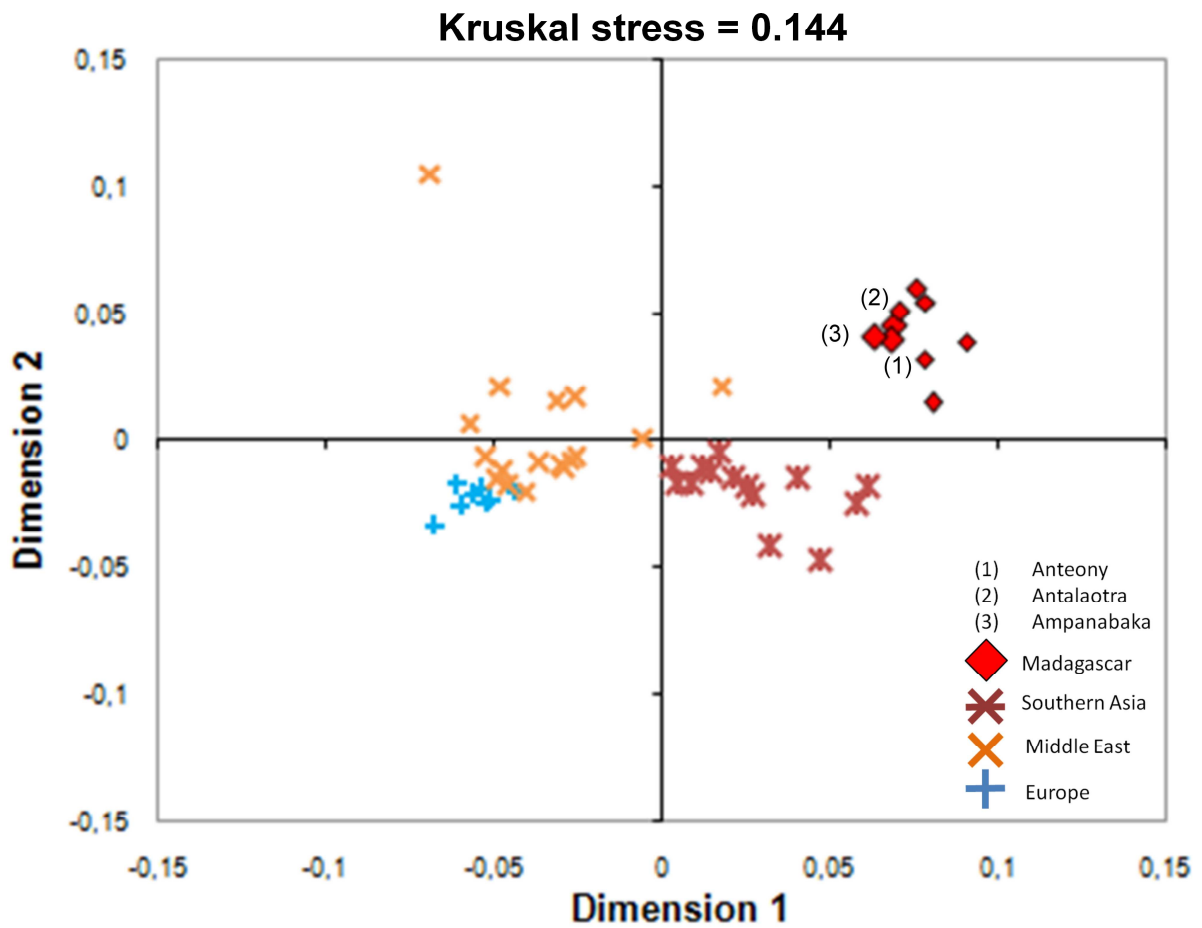

**Figure S5.** MDS plots of  $F_{ST}$  computed from HVI haplotypes between the Antemoro and populations from various geographic regions. (a) African populations, (b) Southeast Asian and Oceanian populations; (c) European and west Eurasian populations.



## References

1. Belezã S, Gusmao L, Amorim A, Carracedo A, Salas A (2005) The genetic legacy of western Bantu migrations. *Hum Genet* 117: 366-375.
2. Coelho M, Sequeira F, Luiselli D, Belezã S, Rocha J (2009) On the edge of Bantu expansions: mtDNA, Y chromosome and lactase persistence genetic variation in southwestern Angola. *BMC Evol Biol* 9: 80.
3. Cruciani F, Santolamazza P, Shen P, Macaulay V, Moral P, et al. (2002) A back migration from Asia to sub-Saharan Africa is supported by high-resolution analysis of human Y-chromosome haplotypes. *Am J Hum Genet* 70: 1197-1214.
4. Luis JR, Rowold DJ, Regueiro M, Caeiro B, Cinnioglu C, et al. (2004) The Levant versus the Horn of Africa: evidence for bidirectional corridors of human migrations. *Am J Hum Genet* 74: 532-544.
5. de Filippo C, Barbieri C, Whitten M, Mpoloka SW, Gunnarsdottir ED, et al. (2011) Y-chromosomal variation in sub-Saharan Africa: insights into the history of Niger-Congo groups. *Mol Biol Evol* 28: 1255-1269.
6. Arroyo-Pardo E, Gusmao L, Lopez-Parra AM, Baeza C, Mesa MS, et al. (2005) Genetic variability of 16 Y-chromosome STRs in a sample from Equatorial Guinea (Central Africa). *Forensic Sci Int* 149: 109-113.
7. Brucato N, Cassar O, Tonasso L, Tortevoeye P, Migot-Nabias F, et al. (2010) The imprint of the Slave Trade in an African American population: mitochondrial DNA, Y chromosome and HTLV-1 analysis in the Noir Marron of French Guiana. *BMC Evol Biol* 10: 314.
8. Goncalves R, Freitas A, Branco M, Rosa A, Fernandes AT, et al. (2005) Y-chromosome lineages from Portugal, Madeira and Acores record elements of Sephardim and Berber ancestry. *Ann Hum Genet* 69: 443-454.
9. Semino O, Santachiara-Benerecetti AS, Falaschi F, Cavalli-Sforza LL, Underhill PA (2002) Ethiopians and Khoisan share the deepest clades of the human Y-chromosome phylogeny. *Am J Hum Genet* 70: 265-268.
10. Knight A, Underhill PA, Mortensen HM, Zhivotovsky LA, Lin AA, et al. (2003) African Y chromosome and mtDNA divergence provides insight into the history of click languages. *Curr Biol* 13: 464-473.
11. Hallenberg C, Simonsen B, Sanchez J, Morling N (2005) Y-chromosome STR haplotypes in Somalis. *Forensic Sci Int* 151: 317-321.
12. Wood ET, Stover DA, Ehret C, Destro-Bisol G, Spedini G, et al. (2005) Contrasting patterns of Y chromosome and mtDNA variation in Africa: evidence for sex-biased demographic processes. *Eur J Hum Genet* 13: 867-876.
13. Gomes V, Alves C, Amorim A, Carracedo A, Sanchez-Diz P, et al. (2009) Nilotes from Karamoja, Uganda: haplotype data defined by 17 Y-chromosome STRs. *Forensic Sci Int Genet* 4: e83-86.
14. Abu-Amero KK, Hellani A, Gonzalez AM, Larruga JM, Cabrera VM, et al. (2009) Saudi Arabian Y-Chromosome diversity and its relationship with nearby regions. *BMC Genet* 10: 59.
15. Robino C, Crobu F, Di Gaetano C, Bekada A, Benhamamouch S, et al. (2008) Analysis of Y-chromosomal SNP haplogroups and STR haplotypes in an Algerian population sample. *Int J Legal Med* 122: 251-255.
16. Immel A-D, Erhuma M, Mustafa T, Kleiber M, Klintshar M (2006) Y-chromosomal STR haplotypes in an Arab population from Lybia. *International Congress Series* 1288: 156-158.
17. Zalloua PA, Platt DE, El Sibai M, Khalife J, Makhoul N, et al. (2008) Identifying genetic traces of historical expansions: Phoenician footprints in the Mediterranean. *Am J Hum Genet* 83: 633-642.
18. Arredi B, Poloni ES, Paracchini S, Zerjal T, Fathallah DM, et al. (2004) A predominantly neolithic origin for Y-chromosomal DNA variation in North Africa. *Am J Hum Genet* 75: 338-345.

19. Thanseem I, Thangaraj K, Chaubey G, Singh VK, Bhaskar LV, et al. (2006) Genetic affinities among the lower castes and tribal groups of India: inference from Y chromosome and mitochondrial DNA. *BMC Genet* 7: 42.
20. Thangaraj K, Naidu BP, Crivellaro F, Tamang R, Upadhyay S, et al. (2010) The influence of natural barriers in shaping the genetic structure of Maharashtra populations. *PLoS One* 5: e15283.
21. Easwarkhanth M, Haque I, Ravesh Z, Romero IG, Meganathan PR, et al. (2009) Traces of sub-Saharan and Middle Eastern lineages in Indian Muslim populations. *Eur J Hum Genet* 18: 354-363.
22. Sengupta S, Zhivotovsky LA, King R, Mehdi SQ, Edmonds CA, et al. (2006) Polarity and temporality of high-resolution y-chromosome distributions in India identify both indigenous and exogenous expansions and reveal minor genetic influence of Central Asian pastoralists. *Am J Hum Genet* 78: 202-221.
23. Adams SM, Bosch E, Balaesque PL, Ballereau SJ, Lee AC, et al. (2008) The genetic legacy of religious diversity and intolerance: paternal lineages of Christians, Jews, and Muslims in the Iberian Peninsula. *Am J Hum Genet* 83: 725-736.
24. Nogueiro I, Manco L, Gomes V, Amorim A, Gusmao L (2010) Phylogeographic analysis of paternal lineages in NE Portuguese Jewish communities. *Am J Phys Anthropol* 141: 373-381.
25. Tofanelli S, Bertocini S, Castri L, Luiselli D, Calafell F, et al. (2009) On the origins and admixture of Malagasy: new evidence from high-resolution analyses of paternal and maternal lineages. *Mol Biol Evol* 26: 2109-2124.
26. Msaidie S, Ducourneau A, Boetsch G, Longepied G, Papa K, et al. (2011) Genetic diversity on the Comoros Islands shows early seafaring as major determinant of human biocultural evolution in the Western Indian Ocean. *Eur J Hum Genet* 19: 89-94.
27. Razafindrazaka H (2010) Le peuplement humain de Madagascar : Anthropologie génétique de trois groupes traditionnels. Toulouse: Université Toulouse III - Paul Sabatier. 399 p.
28. Hurles ME, Sykes BC, Jobling MA, Forster P (2005) The dual origin of the Malagasy in Island Southeast Asia and East Africa: evidence from maternal and paternal lineages. *Am J Hum Genet* 76: 894-901.
29. Shlush LI, Behar DM, Yudkovsky G, Templeton A, Hadid Y, et al. (2008) The Druze: a population genetic refugium of the Near East. *PLoS One* 3: e2105.
30. Mohammad T, Xue Y, Evison M, Tyler-Smith C (2009) Genetic structure of nomadic Bedouin from Kuwait. *Heredity* 103: 425-433.
31. Cerny V, Pereira L, Kujanova M, Vasikova A, Hajek M, et al. (2009) Out of Arabia-the settlement of island Soqatra as revealed by mitochondrial and Y chromosome genetic diversity. *Am J Phys Anthropol* 138: 439-447.
32. Cadenas AM, Zhivotovsky LA, Cavalli-Sforza LL, Underhill PA, Herrera RJ (2008) Y-chromosome diversity characterizes the Gulf of Oman. *Eur J Hum Genet* 16: 374-386.
33. Zalloua PA, Xue Y, Khalife J, Makhoul N, Debiante L, et al. (2008) Y-chromosomal diversity in Lebanon is structured by recent historical events. *Am J Hum Genet* 82: 873-882.
34. Flores C, Maca-Meyer N, Larruga JM, Cabrera VM, Karadsheh N, et al. (2005) Isolates in a corridor of migrations: a high-resolution analysis of Y-chromosome variation in Jordan. *J Hum Genet* 50: 435-441.
35. Sanchez JJ, Hallenberg C, Borsting C, Hernandez A, Morling N (2005) High frequencies of Y chromosome lineages characterized by E3b1, DYS19-11, DYS392-12 in Somali males. *Eur J Hum Genet* 13: 856-866.
36. Al-Zahery N, Semino O, Benuzzi G, Magri C, Passarino G, et al. (2003) Y-chromosome and mtDNA polymorphisms in Iraq, a crossroad of the early human dispersal and of post-Neolithic migrations. *Mol Phylogenet Evol* 28: 458-472.

37. Regueiro M, Cadenas AM, Gayden T, Underhill PA, Herrera RJ (2006) Iran: tricontinental nexus for Y-chromosome driven migration. *Hum Hered* 61: 132-143.
38. El-Sibai M, Platt DE, Haber M, Xue Y, Youhanna SC, et al. (2009) Geographical structure of the Y-chromosomal genetic landscape of the Levant: a coastal-inland contrast. *Ann Hum Genet* 73: 568-581.
39. Haber M, Platt DE, Badro DA, Xue Y, El-Sibai M, et al. (2011) Influences of history, geography, and religion on genetic structure: the Maronites in Lebanon. *Eur J Hum Genet* 19: 334-340.
40. Cinnioglu C, King R, Kivisild T, Kalfoglu E, Atasoy S, et al. (2004) Excavating Y-chromosome haplotype strata in Anatolia. *Hum Genet* 114: 127-148.
41. Karafet TM, Hallmark B, Cox MP, Sudoyo H, Downey S, et al. (2010) Major east-west division underlies Y chromosome stratification across Indonesia. *Mol Biol Evol* 27: 1833-1844.
42. Kayser M, Brauer S, Cordaux R, Casto A, Lao O, et al. (2006) Melanesian and Asian origins of Polynesians: mtDNA and Y chromosome gradients across the Pacific. *Mol Biol Evol* 23: 2234-2244.
43. van Oven M, Hammerle JM, van Schoor M, Kushnick G, Pennekamp P, et al. (2010) Unexpected island effects at an extreme: reduced Y chromosome and mitochondrial DNA diversity in Nias. *Mol Biol Evol* 28: 1349-1361.
44. Mona S, Grunz KE, Brauer S, Pakendorf B, Castri L, et al. (2009) Genetic admixture history of Eastern Indonesia as revealed by Y-chromosome and mitochondrial DNA analysis. *Mol Biol Evol* 26: 1865-1877.
45. Delfin F, Salvador JM, Calacal GC, Perdigon HB, Tabbada KA, et al. (2010) The Y-chromosome landscape of the Philippines: extensive heterogeneity and varying genetic affinities of Negrito and non-Negrito groups. *Eur J Hum Genet* 19: 224-230.
46. Berniell-Lee G, Calafell F, Bosch E, Heyer E, Sica L, et al. (2009) Genetic and demographic implications of the Bantu expansion: insights from human paternal lineages. *Mol Biol Evol* 26: 1581-1589.
47. Lecerf M, Filali M, Gresenguet G, Ndjoyi-Mbiguino A, Le Goff J, et al. (2007) Allele frequencies and haplotypes of eight Y-short tandem repeats in Bantu population living in Central Africa. *Forensic Sci Int* 171: 212-215.
48. Rosa A, Ornelas C, Brehm A, Villems R (2006) Population data on 11 Y-chromosome STRs from Guine-Bissau. *Forensic Sci Int* 157: 210-217.
49. Alves C, Gusmao L, Barbosa J, Amorim A (2003) Evaluating the informative power of Y-STRs: a comparative study using European and new African haplotype data. *Forensic Sci Int* 134: 126-133.
50. Fujihara J, Yuasa I, Muro T, Iida R, Tsubota E, et al. (2009) Allele frequencies and haplotypes for 28 Y-STRs in Ovambo population. *Leg Med (Tokyo)* 11: 205-208.
51. Tishkoff SA, Gonder MK, Henn BM, Mortensen H, Knight A, et al. (2007) History of click-speaking populations of Africa inferred from mtDNA and Y chromosome genetic variation. *Mol Biol Evol* 24: 2180-2195.
52. Quintana-Murci L, Bigham A, Rouba H, Barakat A, McElreavey K, et al. (2004) Y-chromosomal STR haplotypes in Berber and Arabic-speaking populations from Morocco. *Forensic Sci Int* 140: 113-115.
53. Bosch E, Calafell F, Perez-Lezaun A, Comas D, Izaabel H, et al. (2000) Y chromosome STR haplotypes in four populations from northwest Africa. *Int J Legal Med* 114: 36-40.
54. Ayadi I, Ammar-Keskes L, Rebai A (2006) Haplotypes for 13 Y-chromosomal STR loci in South Tunisian population (Sfax region). *Forensic Sci Int* 164: 249-253.
55. Nasidze I, Schadlich H, Stoneking M (2003) Haplotypes from the Caucasus, Turkey and Iran for nine Y-STR loci. *Forensic Sci Int* 137: 85-93.
56. Alshamali F, Pereira L, Budowle B, Poloni ES, Currat M (2009) Local population structure in Arabian Peninsula revealed by Y-STR diversity. *Hum Hered* 68: 45-54.

57. Alakoc YD, Gokcumen O, Tug A, Gultekin T, Gulec E, et al. (2010) Y-chromosome and autosomal STR diversity in four proximate settlements in Central Anatolia. *Forensic Sci Int Genet* 4: e135-137.
58. Dobashi Y, Kido A, Fujitani N, Susukida R, Hara M, et al. (2005) Y-chromosome STR haplotypes in a Bangladeshi population. *Leg Med (Tokyo)* 7: 122-126.
59. Yadav B, Raina A, Dogra TD (2010) Genetic polymorphisms for 17 Y-chromosomal STR haplotypes in Jammu and Kashmir Saraswat Brahmin population. *Leg Med (Tokyo)* 12: 249-255.
60. Balamurugan K, Suhasini G, Vijaya M, Kanthimathi S, Mullins N, et al. (2010) Y chromosome STR allelic and haplotype diversity in five ethnic Tamil populations from Tamil Nadu, India. *Leg Med (Tokyo)* 12: 265-269.
61. Nagy M, Henke L, Henke J, Chatthopadhyay PK, Volgyi A, et al. (2007) Searching for the origin of Romanies: Slovakian Romani, Jats of Haryana and Jat Sikhs Y-STR data in comparison with different Romani populations. *Forensic Sci Int* 169: 19-26.
62. Illeperuma RJ, Markalanda D, Mountain JL, Ratnasooriya WD, Fernandopulle ND, et al. (2009) Haplotype data for 12 Y-chromosome STR loci of Sri Lankans. *Forensic Sci Int Genet* 4: e119-120.
63. Kwak KD, Jin HJ, Shin DJ, Kim JM, Roewer L, et al. (2005) Y-chromosomal STR haplotypes and their applications to forensic and population studies in east Asia. *Int J Legal Med* 119: 195-201.
64. Yong RY, Lee LK, Yap EP (2006) Y-chromosome STR haplotype diversity in three ethnic populations in Singapore. *Forensic Sci Int* 159: 244-257.
65. Chang YM, Perumal R, Keat PY, Kuehn DL (2007) Haplotype diversity of 16 Y-chromosomal STRs in three main ethnic populations (Malays, Chinese and Indians) in Malaysia. *Forensic Sci Int* 167: 70-76.
66. Chang YM, Swaran Y, Phoon YK, Sothirasan K, Sim HT, et al. (2009) Haplotype diversity of 17 Y-chromosomal STRs in three native Sarawak populations (Iban, Bidayuh and Melanau) in East Malaysia. *Forensic Sci Int Genet* 3: e77-80.
67. Souto L, Gusmao L, Ferreira E, Amorim A, Corte-Real F, et al. (2006) Y-chromosome STR haplotypes in East Timor: forensic evaluation and population data. *Forensic Sci Int* 156: 261-265.
68. Rowold DJ, Luis JR, Terreros MC, Herrera RJ (2007) Mitochondrial DNA gene flow indicates preferred usage of the Levant Corridor over the Horn of Africa passageway. *J Hum Genet* 52: 436-447.
69. Brehm A, Pereira L, Bandelt HJ, Prata MJ, Amorim A (2002) Mitochondrial portrait of the Cabo Verde archipelago: the Senegambian outpost of Atlantic slave trade. *Ann Hum Genet* 66: 49-60.
70. Quintana-Murci L, Quach H, Harmant C, Luca F, Massonnet B, et al. (2008) Maternal traces of deep common ancestry and asymmetric gene flow between Pygmy hunter-gatherers and Bantu-speaking farmers. *Proc Natl Acad Sci U S A* 105: 1596-1601.
71. Rosa A, Brehm A, Kivisild T, Metspalu E, Villems R (2004) MtDNA profile of West Africa Guineans: towards a better understanding of the Senegambia region. *Ann Hum Genet* 68: 340-352.
72. Ely B, Wilson JL, Jackson F, Jackson BA (2006) African-American mitochondrial DNAs often match mtDNAs found in multiple African ethnic groups. *BMC Biol* 4: 34.
73. Pereira L, Macaulay V, Torroni A, Scozzari R, Prata MJ, et al. (2001) Prehistoric and historic traces in the mtDNA of Mozambique: insights into the Bantu expansions and the slave trade. *Ann Hum Genet* 65: 439-458.
74. Salas A, Richards M, De la Fe T, Lareu MV, Sobrino B, et al. (2002) The making of the African mtDNA landscape. *Am J Hum Genet* 71: 1082-1111.
75. Castri L, Tofanelli S, Garagnani P, Bini C, Fosella X, et al. (2009) mtDNA variability in two Bantu-speaking populations (Shona and Hutu) from Eastern Africa: implications for peopling and migration patterns in sub-Saharan Africa. *Am J Phys Anthropol* 140: 302-311.

76. Trovoada MJ, Pereira L, Gusmao L, Abade A, Amorim A, et al. (2004) Pattern of mtDNA variation in three populations from Sao Tome e Principe. *Ann Hum Genet* 68: 40-54.
77. Graven L, Passarino G, Semino O, Boursot P, Santachiara-Benerecetti S, et al. (1995) Evolutionary correlation between control region sequence and restriction polymorphisms in the mitochondrial genome of a large Senegalese Mandenka sample. *Mol Biol Evol* 12: 334-345.
78. Rando JC, Pinto F, Gonzalez AM, Hernandez M, Larruga JM, et al. (1998) Mitochondrial DNA analysis of northwest African populations reveals genetic exchanges with European, near-eastern, and sub-Saharan populations. *Ann Hum Genet* 62: 531-550.
79. Chen YS, Olckers A, Schurr TG, Kogelnik AM, Huoponen K, et al. (2000) mtDNA variation in the South African Kung and Khwe-and their genetic relationships to other African populations. *Am J Hum Genet* 66: 1362-1383.
80. Maca-Meyer N, Arnay M, Rando JC, Flores C, Gonzalez AM, et al. (2004) Ancient mtDNA analysis and the origin of the Guanches. *Eur J Hum Genet* 12: 155-162.
81. Goncalves VF, Prosdociimi F, Santos LS, Ortega JM, Pena SDJ (2007) Sex-biased gene flow in African Americans but not in Americans Caucasians. *Genetics and Molecular Research* 6: 256-261.
82. Brakez Z, Bosch E, Izaabel H, Akhayat O, Comas D, et al. (2001) Human mitochondrial DNA sequence variation in the Moroccan population of the Souss area. *Ann Hum Biol* 28: 295-307.
83. Plaza S, Calafell F, Helal A, Bouzerna N, Lefranc G, et al. (2003) Joining the pillars of Hercules: mtDNA sequences show multidirectional gene flow in the western Mediterranean. *Ann Hum Genet* 67: 312-328.
84. Corte-Real HB, Macaulay VA, Richards MB, Hariti G, Issad MS, et al. (1996) Genetic diversity in the Iberian Peninsula determined from mitochondrial sequence analysis. *Ann Hum Genet* 60: 331-350.
85. Ottoni C, Martinez-Labarga C, Loogvali EL, Pennarun E, Achilli A, et al. (2009) First genetic insight into Libyan Tuaregs: a maternal perspective. *Ann Hum Genet* 73: 438-448.
86. Turchi C, Buscemi L, Giacchino E, Onofri V, Fendt L, et al. (2009) Polymorphisms of mtDNA control region in Tunisian and Moroccan populations: an enrichment of forensic mtDNA databases with Northern Africa data. *Forensic Sci Int Genet* 3: 166-172.
87. Coudray C, Olivieri A, Achilli A, Pala M, Melhaoui M, et al. (2009) The complex and diversified mitochondrial gene pool of Berber populations. *Ann Hum Genet* 73: 196-214.
88. Brandstatter A, Peterson CT, Irwin JA, Mpoke S, Koech DK, et al. (2004) Mitochondrial DNA control region sequences from Nairobi (Kenya): inferring phylogenetic parameters for the establishment of a forensic database. *Int J Legal Med* 118: 294-306.
89. Kivisild T, Reidla M, Metspalu E, Rosa A, Brehm A, et al. (2004) Ethiopian mitochondrial DNA heritage: tracking gene flow across and around the gate of tears. *Am J Hum Genet* 75: 752-770.
90. Krings M, Salem AE, Bauer K, Geisert H, Malek AK, et al. (1999) mtDNA analysis of Nile River Valley populations: A genetic corridor or a barrier to migration? *Am J Hum Genet* 64: 1166-1176.
91. Poloni ES, Naciri Y, Bucho R, Niba R, Kervaire B, et al. (2009) Genetic evidence for complexity in ethnic differentiation and history in East Africa. *Ann Hum Genet* 73: 582-600.
92. Nasidze I, Quinque D, Ozturk M, Bendukidze N, Stoneking M (2005) MtDNA and Y-chromosome variation in Kurdish groups. *Ann Hum Genet* 69: 401-412.
93. Comas D, Plaza S, Wells RS, Yuldaseva N, Lao O, et al. (2004) Admixture, migrations, and dispersals in Central Asia: evidence from maternal DNA lineages. *Eur J Hum Genet* 12: 495-504.
94. Vernesi C, Di Benedetto G, Caramelli D, Secchieri E, Simoni L, et al. (2001) Genetic characterization of the body attributed to the evangelist Luke. *Proc Natl Acad Sci U S A* 98: 13460-13463.

95. Macaulay V, Richards M, Hickey E, Vega E, Cruciani F, et al. (1999) The emerging tree of West Eurasian mtDNAs: a synthesis of control-region sequences and RFLPs. *Am J Hum Genet* 64: 232-249.
96. Comas D, Calafell F, Bendukidze N, Fananas L, Bertranpetit J (2000) Georgian and kurd mtDNA sequence analysis shows a lack of correlation between languages and female genetic lineages. *Am J Phys Anthropol* 112: 5-16.
97. Irwin J, Saunier J, Strouss K, Paintner C, Diegoli T, et al. (2008) Mitochondrial control region sequences from northern Greece and Greek Cypriots. *Int J Legal Med* 122: 87-89.
98. Metspalu M, Kivisild T, Metspalu E, Parik J, Hudjashov G, et al. (2004) Most of the extant mtDNA boundaries in south and southwest Asia were likely shaped during the initial settlement of Eurasia by anatomically modern humans. *BMC Genet* 5: 26.
99. Alshamali F, Brandstatter A, Zimmermann B, Parson W (2008) Mitochondrial DNA control region variation in Dubai, United Arab Emirates. *Forensic Sci Int Genet* 2: e9-10.
100. Quintana-Murci L, Chaix R, Wells RS, Behar DM, Sayar H, et al. (2004) Where west meets east: the complex mtDNA landscape of the southwest and Central Asian corridor. *Am J Hum Genet* 74: 827-845.
101. Calafell F, Underhill P, Tolun A, Angelicheva D, Kalaydjieva L (1996) From Asia to Europe: mitochondrial DNA sequence variability in Bulgarians and Turks. *Ann Hum Genet* 60: 35-49.
102. Gonzalez AM, Karadsheh N, Maca-Meyer N, Flores C, Cabrera VM, et al. (2008) Mitochondrial DNA variation in Jordanians and their genetic relationship to other Middle East populations. *Ann Hum Biol* 35: 212-231.
103. Derenko M, Malyarchuk B, Grzybowski T, Denisova G, Dambueva I, et al. (2007) Phylogeographic analysis of mitochondrial DNA in northern Asian populations. *Am J Hum Genet* 81: 1025-1041.
104. Abu-Amero KK, Gonzalez AM, Larruga JM, Bosley TM, Cabrera VM (2007) Eurasian and African mitochondrial DNA influences in the Saudi Arabian population. *BMC Evol Biol* 7: 32.
105. Bamshad MJ, Watkins WS, Dixon ME, Jorde LB, Rao BB, et al. (1998) Female gene flow stratifies Hindu castes. *Nature* 395: 651-652.
106. Mountain JL, Hebert JM, Bhattacharyya S, Underhill PA, Ottolenghi C, et al. (1995) Demographic history of India and mtDNA-sequence diversity. *Am J Hum Genet* 56: 979-992.
107. Cordaux R, Saha N, Bentley GR, Aunger R, Sirajuddin SM, et al. (2003) Mitochondrial DNA analysis reveals diverse histories of tribal populations from India. *Eur J Hum Genet* 11: 253-264.
108. Basu A, Mukherjee N, Roy S, Sengupta S, Banerjee S, et al. (2003) Ethnic India: a genomic view, with special reference to peopling and structure. *Genome Res* 13: 2277-2290.
109. Roychoudhury S, Roy S, Basu A, Banerjee R, Vishwanathan H, et al. (2001) Genomic structures and population histories of linguistically distinct tribal groups of India. *Hum Genet* 109: 339-350.
110. Baig MM, Khan AA, Kulkarni KM (2004) Mitochondrial DNA diversity in tribal and caste groups of Maharashtra (India) and its implication on their genetic origins. *Ann Hum Genet* 68: 453-460.
111. Sahoo S, Kashyap VK (2006) Phylogeography of mitochondrial DNA and Y-chromosome haplogroups reveal asymmetric gene flow in populations of Eastern India. *Am J Phys Anthropol* 131: 84-97.
112. Kivisild T, Bamshad MJ, Kaldma K, Metspalu M, Metspalu E, et al. (1999) Deep common ancestry of Indian and western-Eurasian mitochondrial DNA lineages. *Curr Biol* 9: 1331-1334.
113. Kaur I, Roy S, Chakrabarti S, Sarhadi VK, Majumder PP, et al. (2002) Genomic diversities and affinities among four endogamous groups of Punjab (India) based on autosomal and mitochondrial DNA polymorphisms. *Hum Biol* 74: 819-836.

114. Sharma S, Saha A, Rai E, Bhat A, Bamezai R (2005) Human mtDNA hypervariable regions, HVR I and II, hint at deep common maternal founder and subsequent maternal gene flow in Indian population groups. *J Hum Genet* 50: 497-506.
115. Gan RJ, Pan SL, Mustavich LF, Qin ZD, Cai XY, et al. (2008) Pinghua population as an exception of Han Chinese's coherent genetic structure. *J Hum Genet* 53: 303-313.
116. Fornarino S, Pala M, Battaglia V, Maranta R, Achilli A, et al. (2009) Mitochondrial and Y-chromosome diversity of the Tharus (Nepal): a reservoir of genetic variation. *BMC Evol Biol* 9: 154.
117. Forster P, Cali F, Rohl A, Metspalu E, D'Anna R, et al. (2002) Continental and subcontinental distributions of mtDNA control region types. *Int J Legal Med* 116: 99-108.
118. Salas A, Comas D, Lareu MV, Bertranpetit J, Carracedo A (1998) mtDNA analysis of the Galician population: a genetic edge of European variation. *Eur J Hum Genet* 6: 365-375.
119. Falchi A, Giovannoni L, Calo CM, Piras IS, Moral P, et al. (2006) Genetic history of some western Mediterranean human isolates through mtDNA HVR1 polymorphisms. *J Hum Genet* 51: 9-14.
120. Sampietro ML, Caramelli D, Lao O, Calafell F, Comas D, et al. (2005) The genetics of the pre-Roman Iberian Peninsula: a mtDNA study of ancient Iberians. *Ann Hum Genet* 69: 535-548.
121. Varesi L, Memmi M, Cristofari MC, Mameli GE, Calo CM, et al. (2000) Mitochondrial control-region sequence variation in the Corsican population, France. *Am J Hum Biol* 12: 339-351.
122. Dubut V, Chollet L, Murail P, Cartault F, Beraud-Colomb E, et al. (2004) mtDNA polymorphisms in five French groups: importance of regional sampling. *Eur J Hum Genet* 12: 293-300.
123. Piercy R, Sullivan KM, Benson N, Gill P (1993) The application of mitochondrial DNA typing to the study of white Caucasian genetic identification. *Int J Legal Med* 106: 85-90.
124. Jin HJ, Tyler-Smith C, Kim W (2009) The peopling of Korea revealed by analyses of mitochondrial DNA and Y-chromosomal markers. *PLoS One* 4: e4210.
125. Li H, Cai X, Winograd-Cort ER, Wen B, Cheng X, et al. (2007) Mitochondrial DNA diversity and population differentiation in southern East Asia. *Am J Phys Anthropol* 134: 481-488.
126. Hill C, Soares P, Mormina M, Macaulay V, Clarke D, et al. (2007) A mitochondrial stratigraphy for island southeast Asia. *Am J Hum Genet* 80: 29-43.
127. Macaulay V, Hill C, Achilli A, Rengo C, Clarke D, et al. (2005) Single, rapid coastal settlement of Asia revealed by analysis of complete mitochondrial genomes. *Science* 308: 1034-1036.
128. Thangaraj K, Singh L, Reddy AG, Rao VR, Sehgal SC, et al. (2003) Genetic affinities of the Andaman Islanders, a vanishing human population. *Curr Biol* 13: 86-93.
129. Sykes B, Leiboff A, Low-Beer J, Tetzner S, Richards M (1995) The origins of the Polynesians: an interpretation from mitochondrial lineage analysis. *Am J Hum Genet* 57: 1463-1475.
130. Tajima A, Hayami M, Tokunaga K, Juji T, Matsuo M, et al. (2004) Genetic origins of the Ainu inferred from combined DNA analyses of maternal and paternal lineages. *J Hum Genet* 49: 187-193.
131. Simonson TS, Xing J, Barrett R, Jerah E, Loa P, et al. (2011) Ancestry of the Iban is predominantly Southeast Asian: genetic evidence from autosomal, mitochondrial, and Y chromosomes. *PLoS One* 6: e16338.
132. Maruyama S, Nohira-Koike C, Minaguchi K, Nambiar P (2010) MtDNA control region sequence polymorphisms and phylogenetic analysis of Malay population living in or around Kuala Lumpur in Malaysia. *Int J Legal Med* 124: 165-170.
133. Wong HY, Tang JS, Budowle B, Allard MW, Syn CK, et al. (2007) Sequence polymorphism of the mitochondrial DNA hypervariable regions I and II in 205 Singapore Malays. *Leg Med (Tokyo)* 9: 33-37.
134. Tommaseo-Ponzetta M, Attimonelli M, De Robertis M, Tanzariello F, Saccone C (2002) Mitochondrial DNA variability of West New Guinea populations. *Am J Phys Anthropol* 117: 49-67.

135. Friedlaender JS, Gentz F, Green K, Merriwether DA (2002) A cautionary tale on ancient migration detection: mitochondrial DNA variation in Santa Cruz Islands, Solomon Islands. *Hum Biol* 74: 453-471.
136. Kayser M, Choi Y, van Oven M, Mona S, Brauer S, et al. (2008) The impact of the Austronesian expansion: evidence from mtDNA and Y chromosome diversity in the Admiralty Islands of Melanesia. *Mol Biol Evol* 25: 1362-1374.
137. Ohashi J, Naka I, Tokunaga K, Inaoka T, Ataka Y, et al. (2006) Brief communication: mitochondrial DNA variation suggests extensive gene flow from Polynesian ancestors to indigenous Melanesians in the northwestern Bismarck Archipelago. *Am J Phys Anthropol* 130: 551-556.
138. Ricaut FX, Thomas T, Arganini C, Staughton J, Leavesley M, et al. (2008) Mitochondrial DNA variation in Karkar Islanders. *Ann Hum Genet* 72: 349-367.
139. Hagelberg E, Goldman N, Lio P, Whelan S, Schiefenovel W, et al. (1999) Evidence for mitochondrial DNA recombination in a human population of island Melanesia. *Proc Biol Sci* 266: 485-492.
140. Chiaroni J, King RJ, Myres NM, Henn BM, Ducourneau A, et al. (2009) The emergence of Y-chromosome haplogroup J1e among Arabic-speaking populations. *Eur J Hum Genet* 18: 348-353.
141. Tofanelli S, Ferri G, Bulayeva K, Caciagli L, Onofri V, et al. (2009) J1-M267 Y lineage marks climate-driven pre-historical human displacements. *Eur J Hum Genet* 17: 1520-1524.
142. Mirabal S, Varljen T, Gayden T, Rugeley M, Vujovic S, et al. (2010) Human Y-chromosome short tandem repeats: a tale of acculturation and migrations as mechanisms for the diffusion of agriculture in the Balkan Peninsula. *Am J Phys Anthropol* 142: 380-390.
143. Coelho M, Sequeira F, Luiselli D, Beza S, Rocha J (2009) On the edge of Bantu expansions: mtDNA, Y chromosome and lactase persistence genetic variation in southwestern Angola. *BMC Evol Biol* 9: 80.
144. Blanco-Verea A, Jaime JC, Brion M, Carracedo A (2009) Y-chromosome lineages in native South American population. *Forensic Sci Int Genet* 4: 187-193.
145. King TE, Bowden GR, Balaesque PL, Adams SM, Shanks ME, et al. (2007) Thomas Jefferson's Y chromosome belongs to a rare European lineage. *Am J Phys Anthropol* 132: 584-589.
146. Zhong H, Shi H, Qi XB, Duan ZY, Tan PP, et al. (2011) Extended Y chromosome investigation suggests postglacial migrations of modern humans into East Asia via the northern route. *Mol Biol Evol* 28: 717-727.
